# Supplementary material
Source: PubMed Central journal article supplement (PMC4669536)

# Dearomative Indole (3+2) Reactions with Azaoxyallyl Cations – New Method for the Synthesis of Pyrroloindolines

## Supporting Information

Maria C. DiPoto, Russell P. Hughes, and Jimmy Wu\*

*Department of Chemistry, Dartmouth College, Hanover, New Hampshire 03755, United States*

|                                                                                 |           |
|---------------------------------------------------------------------------------|-----------|
| <b>1. General Information.....</b>                                              | <b>2</b>  |
| <b>2. Optimization Table.....</b>                                               | <b>3</b>  |
| <b>3. Experimental Procedures.....</b>                                          | <b>4</b>  |
| <b>a. General procedure for synthesis of <math>\alpha</math>-haloamide.....</b> | <b>4</b>  |
| <b>b. Synthesis of 3-substituted indoles.....</b>                               | <b>5</b>  |
| <b>c. General procedure for (3+2) annulation reaction.....</b>                  | <b>9</b>  |
| <b>d. General procedure for N–O bond cleavage.....</b>                          | <b>17</b> |
| <b>e. General procedure for Protodehalogenation reaction.....</b>               | <b>17</b> |
| <b>4. DFT Calculations.....</b>                                                 | <b>18</b> |
| <b>5. NMR Spectra.....</b>                                                      | <b>25</b> |

## 1. General Information

<sup>1</sup>H-NMR data were recorded on a Bruker Avance III 500 MHz spectrometer (TBI probe) and a Bruker Avance III 600 MHz spectrometer (BBFO probe) with calibration of spectra to CHCl<sub>3</sub> (7.26 ppm) or CH<sub>2</sub>Cl<sub>2</sub> (5.32 ppm). <sup>13</sup>C-NMR data were recorded at 125 MHz on a Bruker Avance III 500 MHz spectrometer (TBI probe) and at 150 MHz on a Bruker Avance III 600 MHz spectrometer (BBFO probe) at ambient temperature (unless otherwise noted) and are expressed in ppm using solvent as the internal standard (CDCl<sub>3</sub> at 77.16 ppm, CD<sub>2</sub>Cl<sub>2</sub> at 53.84 ppm). Two-dimensional NMR spectra, including CO-SY, HSQC, HMBC and NOESY were recorded on a Bruker Avance III 500 MHz spectrometer (TBI probe) and a Bruker Avance III 600 MHz spectrometer (BBFO probe). Infrared spectra were recorded on a JASCO FT/IRM4100 Fourier Transform Infrared Spectrometer. Chemical shift values (δ) are expressed in ppm downfield relative to internal standard (tetramethylsilane at 0 ppm). Multiplicities are indicated as s (singlet), d (doublet), t (triplet), q (quartet), m (multiplet) and br s (broad singlet). Coupling constants are reported in hertz (Hz). Analytical thin layer chromatography (TLC) was performed on SILICYCLE pre-coated TLC plates (silica gel 60 F-254, 0.25 mm). Visualization was accomplished with UV light and/or with ceric ammonium molybdate (CAM) or KMnO<sub>4</sub> staining solutions. Flash column chromatography was performed using Biotage<sup>®</sup> Isolera System on Biotage<sup>®</sup> SNAP Ultra 10 g or 25 g columns (part No. FSUL-0442-0010 and FSUL-0442-0025). High resolution mass spectra were acquired from the Mass Spectrometry Laboratory of University of Illinois (Urbana-Champaign, IL). Melting points were determined using a Stanford Research Systems DigiMelt MPA-160 capillary melting point apparatus.

All reactions were carried out in oven or flame-dried glassware with magnetic stirring. Toluene, tetrahydrofuran (THF), diethyl ether (Et<sub>2</sub>O) and methylene chloride (CH<sub>2</sub>Cl<sub>2</sub>) were dried and purified using the Glass Contour Solvent Purification System<sup>®</sup> (from Pure Process Technology, LLC) by passing the solvents through two drying columns after being purged with nitrogen. All reagents and starting materials, unless otherwise noted, were purchased from commercial vendors and used without further purification.

## 2. Full Optimization Table

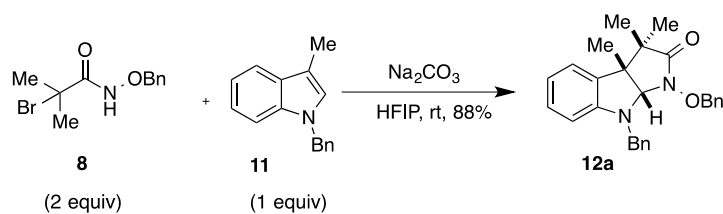

| Entry           | Base                     | Solvent                              | Conc. <sup>a</sup> | Temp. <sup>b</sup> | Time <sup>c</sup> | Yield <sup>d</sup> |
|-----------------|--------------------------|--------------------------------------|--------------------|--------------------|-------------------|--------------------|
| 1               | $\text{Na}_2\text{CO}_3$ | TFE                                  | 0.25               | rt                 | 4                 | 94                 |
| 2               | $\text{Na}_2\text{CO}_3$ | TFE                                  | 0.25               | 0                  | 6                 | 61                 |
| 3 <sup>e</sup>  | $\text{Na}_2\text{CO}_3$ | TFE                                  | 0.25               | rt                 | 6                 | 91                 |
| 4               | $\text{Na}_2\text{CO}_3$ | THF                                  | 0.25               | rt                 | 18                | No rxn             |
| 5               | $\text{NEt}_3$           | HFIP                                 | 0.25               | rt                 | 16                | 42                 |
| 6               | $\text{K}_2\text{CO}_3$  | HFIP                                 | 0.25               | rt                 | 8                 | 40                 |
| 7               | $\text{Cs}_2\text{CO}_3$ | HFIP                                 | 0.25               | rt                 | 12                | 46                 |
| 8               | $\text{Na}_2\text{CO}_3$ | HFIP                                 | 0.25               | rt                 | 4                 | 89                 |
| 9 <sup>e</sup>  | $\text{Na}_2\text{CO}_3$ | HFIP                                 | 0.25               | rt                 | 18                | 66                 |
| 10              | $\text{Na}_2\text{CO}_3$ | HFIP                                 | 0.50               | rt                 | 6                 | 39                 |
| 11              | $\text{K}_2\text{CO}_3$  | HFIP                                 | 0.25               | 0                  | 8                 | 40                 |
| 12 <sup>f</sup> | $\text{Na}_2\text{CO}_3$ | HFIP                                 | 0.25               | 0                  | 10+               | 64                 |
| 13              | $\text{NEt}_3$           | $\text{LiClO}_4/\text{Et}_2\text{O}$ | 0.25               | rt                 | 48                | 50                 |
| 14              | $\text{Na}_2\text{CO}_3$ | $\text{LiClO}_4/\text{Et}_2\text{O}$ | 0.25               | rt                 | 48                | No rxn             |
| 15              | $\text{Na}_2\text{CO}_3$ | $\text{LiClO}_4/\text{THF}$          | 0.25               | rt                 | 48                | 30                 |
| 16              | $\text{Na}_2\text{CO}_3$ | $\text{LiClO}_4/\text{CHCl}_3$       | 0.25               | rt                 | 48                | 50                 |
| 17              | $\text{Na}_2\text{CO}_3$ | MeOH                                 | 0.25               | rt                 | 36                | trace              |
| 18              | $\text{Na}_2\text{CO}_3$ | $\text{CH}_2\text{Cl}_2$             | 0.25               | rt                 | 48                | No rxn             |
| 19              | $\text{Na}_2\text{CO}_3$ | TFE                                  | 0.1                | rt                 | 6                 | 53                 |
| 20              | $\text{Na}_2\text{CO}_3$ | TFE                                  | 1                  | rt                 | 4                 | 61                 |

<sup>a</sup>(M), <sup>b</sup>(°C), <sup>c</sup>(h), <sup>d</sup>(% isolated yield), <sup>e</sup> 2 equiv indole, 1 equiv haloamide, <sup>f</sup> 1 equiv indole, 1 equiv haloamide

### 3. Experimental Procedures

#### a. General procedure A for synthesis of $\alpha$ -haloamide<sup>1</sup>

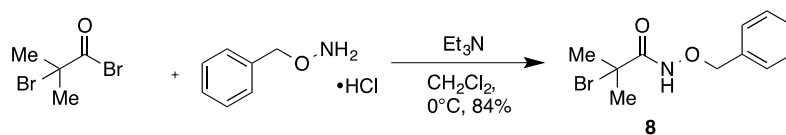

To a solution of *O*-benzylhydroxylamine HCl (2 g, 12.5 mmol, 1 eq.) in dichloromethane (50 mL), triethylamine (1.75 mL, 12.5 mmol, 1 eq.) was added. The reaction mixture was then cooled to  $0^\circ\text{C}$ . Next, 2-bromo-2-methylpropanoyl bromide (1.5 mL, 12.5 mmol, 1 eq.) was added dropwise to the reaction mixture. The reaction was stirred for 4 h at  $0^\circ\text{C}$ . After 4 h, the reaction mixture was then allowed to warm to room temperature and was quenched with water. The resulting mixture was then washed with brine (x3). The organic layer was dried over anhydrous sodium sulfate, filtered, and concentrated under vacuum. The crude reaction mixture was purified by silica gel chromatography (ethyl acetate/hexanes) to give haloamide **8** as a white solid (2.8 g, 84%).<sup>1</sup>

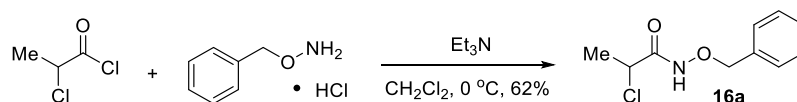

To a solution of *O*-benzylhydroxylamine HCl (2 g, 12.5 mmol, 1 eq.) in dichloromethane (50 mL), triethylamine (1.75 mL, 12.5 mmol, 1 eq.) was added. The reaction mixture was then cooled to  $0^\circ\text{C}$ . Next, 2-chloropropionyl chloride (1.2 mL, 12.5 mmol, 1 eq.) was added dropwise to the reaction mixture. The reaction was stirred for 8 h at  $0^\circ\text{C}$ . After 8 h, the reaction mixture was then allowed to warm to room temperature and was quenched with water. The resulting mixture was then washed with brine (x3). The organic layer was dried over anhydrous sodium sulfate, filtered, and concentrated under vacuum. The crude reaction mixture was purified by silica gel chromatography (ethyl acetate/hexanes) to give haloamide **16a** as a white solid (1.6 g, 62%).

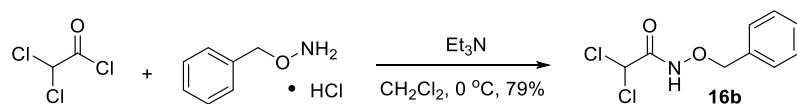

To a solution of *O*-benzylhydroxylamine HCl (2.1 g, 13.6 mmol, 1 eq.) in dichloromethane (54 mL), triethylamine (1.9 mL, 13.6 mmol, 1 eq.) was added. The reaction mixture was then cooled to  $0^\circ\text{C}$ . Next, dichloroacetyl chloride (1.3 mL, 13.6 mmol, 1 eq.) was added dropwise to the reaction mixture. The reaction was stirred for 4 h at  $0^\circ\text{C}$ . After 4 h, the reaction mixture was then allowed to warm to room temperature and was quenched with water. The resulting mixture was washed with brine (x3). The organic layer was dried over anhydrous sodium sulfate, filtered, and concentrated under vacuum. The crude reaction mixture was purified by silica gel chromatography (ethyl acetate/hexanes) to give haloamide **16b** as a white solid (2.5 g, 79%).<sup>1</sup>

<sup>1</sup> Jeffrey, C. S.; Barnes, K.; Eickhoff, J.; Carson, C. *J. Am. Chem. Soc.* **2011**, *133*, 7688–7691.

## b. Synthesis of 3-Substituted Indoles

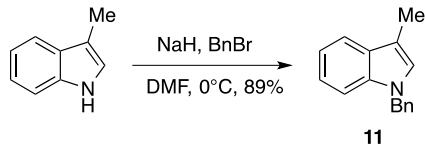

To a flame-dried flask containing 3-methylindole (500 mg, 3.9 mmol, 1 eq.), dry DMF (8 mL) was added. The solution was cooled to 0 °C. NaH (273 mg, 11.44 mmol, 3 eq.) in dry DMF (2 mL) was then added dropwise. The reaction was stirred at 0 °C for 45 min. After 45 min, benzyl bromide (0.6 mL, 4.96 mmol, 1.2 eq) was added dropwise. The reaction was allowed to warm to room temperature. Once reaction was determined to be complete via thin layer chromatographic analysis, the reaction was quenched with saturated aqueous ammonium chloride. The resulting mixture was washed with water (x3), followed by brine (x1). The organic layer was then dried over anhydrous sodium sulfate, filtered, and concentrated under vacuum. The crude reaction mixture was purified by silica gel chromatography (ethyl acetate/hexanes) to give N-benzylindole product **11** as a white solid (769 mg, 89%).<sup>2</sup>

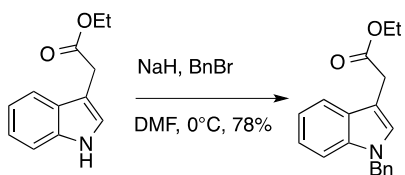

By following the general procedure B described above, a mixture of ethyl-3-indole acetate (203 mg, 1.00 mmol, 1 eq), NaH (71.9 mg, 3.00 mmol, 3 eq), and BnBr (0.3 mL, 2.60 mmol) in DMF (10 mL) afforded N-benzyl-ethyl-3-indole acetate as a white solid (228 mg, 78%).<sup>3</sup>

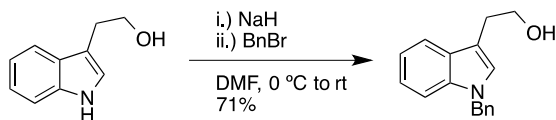

By following the general procedure B described above, a mixture of tryptophol (1g, 6.2 mmol), NaH (446 mg, 18.6 mmol), benzyl bromide (0.8 mL, 6.8 mmol) in dry DMF (56 mL) afforded N-benzyltryptophol as a yellow oil (1.0 g, 71%).<sup>4</sup>

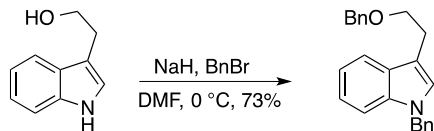

By following the general procedure B described above, a mixture of tryptophol (500 mg, 3.102 mmol), NaH (223 mg, 9.305 mmol), benzyl bromide (0.96 mL, 8.065 mmol) in dry DMF (30 mL) afforded O-benzyl-N-methyl tryptamine (772 mg, 73%).<sup>5</sup>

<sup>2</sup> Cheng, H-G.; Lu, L-Q.; Wang, T.; Yang, Q-Q.; Liu, X-P.; Deng, Q-H.; Chen, J-R.; Xiao, W-J. *Angew. Chem. Int. Ed.* **2013**, *52*, 3250–3254.

<sup>3</sup> Alemany et al. *Anales de Quimica* **1974**, *70*, 1102–1105.

<sup>4</sup> Han, L.; Liu, C.; Zhang, W.; Shi, X-X.; You, S-L. *Chem. Commun.* **2014**, *50*, 1231–1233.

<sup>5</sup> Davis, F. A.; Melamed, J.Y.; Sharik, S.S. *J. Org. Chem.* **2006**, *71*, 8761–8766.

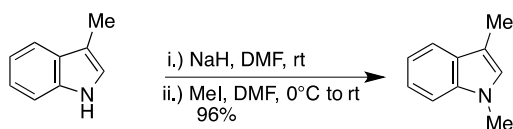

By following the general procedure B described above, a mixture of 3-methylindole (500 mg, 3.91 mmol, 1 eq.), NaH (273 mg, 11.44 mmol, 3 eq.), and MeI (308  $\mu$ L, 4.98 mmol, 1.2 eq) in dry DMF (10 mL) afforded 1,3-dimethylindole as a colorless oil (0.54 g, 96%).<sup>6</sup>

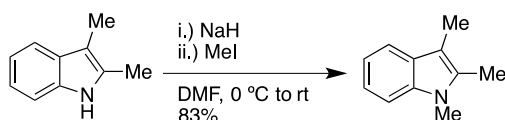

By following the general procedure B described above, a mixture of 2,3-methylindole (290 mg, 4 mmol, 1 eq.), NaH (288 mg, 12 mmol, 3 eq.) in dry DMF (2 mL), and MeI (374  $\mu$ L, 6 mmol, 1.5 eq) in dry DMF (10 mL) afforded 1,2,3-trimethylindole as a colorless oil (527 mg, 83%).<sup>7</sup>

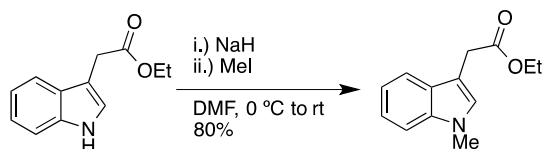

By following the general procedure B described above, a mixture of indole-3-ethyl acetate (500 mg, 2.46 mmol, 1 eq.), NaH (177 mg, 7.39 mmol, 3 eq.), and MeI (400  $\mu$ L, 6.40 mmol, 2.6 eq) in dry DMF (22 mL) afforded N-methylindole-3-ethyl acetate as a colorless oil (425 mg, 80%).<sup>8</sup>

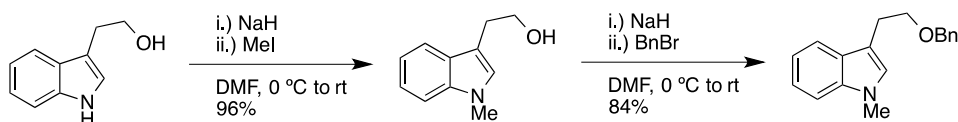

To a flame-dried flask containing tryptophol (230 mg, 1.42 mmol, 1 eq.), dry DMF (2 mL) was added. The solution was cooled to 0 °C. NaH (102 mg, 4.26 mmol, 3 eq.) in dry DMF (1 mL) was then added dropwise. The reaction was stirred at 0 °C for 45 min. After 45 min, MeI (96  $\mu$ L, 1.56 mmol, 1 eq) was then added dropwise. The reaction was allowed to warm to room temperature. Once the reaction was determined to be complete via thin layer chromatographic analysis, the reaction was quenched with saturated aqueous ammonium chloride. The resulting mixture was washed with water (x3), followed by brine (x1). The organic layer was then dried over anhydrous sodium sulfate, filtered, and concentrated under vacuum. The crude reaction mixture was purified by silica gel chromatography (ethyl acetate/hexanes) to give N-methyltryptophol (240 mg, 96%). Next, to a flame-dried flask containing N-methyltryptophol (215 mg, 1.29 mmol, 1 eq.), dry DMF (10 mL) was added. The solution was cooled to 0 °C. NaH (88 mg, 3.68 mmol, 3 eq.) in dry DMF (2 mL) was then added dropwise and reaction was stirred at 0 °C for 45 min. After 45 min, benzyl bromide (0.4 mL, 3.20 mmol, 2.6 eq) was added dropwise, and the reaction was allowed to warm to room temperature. Once the reaction was determined to be complete via thin layer chromatographic analysis, the reaction was quenched with saturated aqueous ammonium chloride.

<sup>6</sup> Klare, H. F. T.; Oestreich, M.; Ito, J-I.; Nishiyama, H.; Ohki, Y.; Tatsumi, K. *J. Am. Chem. Soc.* **2011**, *133*, 3312–3315.

<sup>7</sup> Liu, Y.; Yao, B.; Deng, C-L.; Tang, R-Y.; Zhang, X-G.; Li, J-H. *Org. Lett.* **2011**, *13*, 1126–1129.

<sup>8</sup> Greulich, T. W.; Daniliuc, C.G.; Studer, A. *Org. Lett.* **2015**, *17*, 254–257.

The resulting mixture was washed with water (x3), followed by brine (x1). The organic layer was then dried over anhydrous sodium sulfate, filtered, and concentrated under vacuum. The crude reaction mixture was purified by silica gel chromatography (ethyl acetate/hexanes) to give O-benzyl-N-methyltryptamine product (271 mg, 84 %).<sup>9</sup>

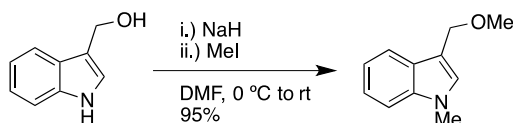

By following the general procedure B described above, a mixture of 3-indole methanol (500 mg, 3.4 mmol, 1 eq.), NaH (245 mg, 10.2 mmol, 3 eq.), and MeI (0.55 mL, 8.84 mmol, 2.6 eq) in dry DMF (43 mL) afforded N,O-dimethylindole product (169 mg, 95%).<sup>10</sup>

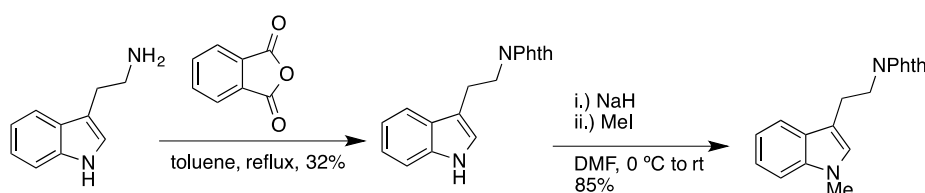

To a round bottom flask containing tryptamine (365 mg, 2.28 mmol, 1 eq) in toluene (5 mL), phthalic anhydride was added (404 mg, 2.73 mmol, 1.2 eq). The reaction was then stirred at reflux for 12 h. Once reaction was determined to be complete via thin layer chromatographic analysis, the reaction mixture was concentrated under vacuum. The product was then recrystallized using ethyl acetate (212 mg, 32 %). Then, to a flame-dried flask containing indole N'-phthalyltryptamine (35 mg, 0.12 mmol, 1 eq.), dry DMF (0.1 mL) was added. The solution was cooled to 0 °C. Then, NaH (8 mg, 0.24 mmol, 3 eq.) in dry DMF (0.1 mL) was added dropwise. The reaction was stirred at 0 °C for 45 min. After 45 min, MeI (7  $\mu$ L, 0.1 mmol, 1.2 eq) was added. The reaction was allowed to warm to room temperature. Once reaction was determined to be complete via thin layer chromatographic analysis, the reaction was quenched with saturated aqueous ammonium chloride. The resulting mixture was washed with water (x3), followed by brine (x1). The organic layer was then dried over anhydrous sodium sulfate, filtered, and concentrated under vacuum. The crude reaction mixture was purified by silica gel chromatography (ethyl acetate/hexanes) to give N-methyl-N'-phthalyltryptamine (588 mg, 85%).<sup>2</sup>

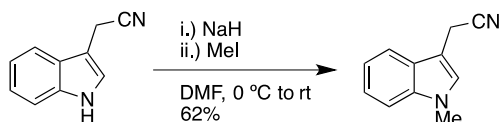

Following general procedure B as described above, a mixture of indole-3-acetonitrile (1 g, 6.4 mmol, 1 eq.), NaH (200 mg, 8.33 mmol, 3 eq.), and MeI (0.6 mL, 9.58 mmol, 1.5 eq) in dry DMF (7 mL) afforded N-methylindole-3-acetonitrile as a colorless oil (672 mg, 62 %).<sup>11</sup>

<sup>9</sup> Yadav, J.S.; Reddy, B. V. S.; Reddy, C. S.; Kishna A. D. *Tet. Lett.* **2007**, *41*, 2029–2032.

<sup>10</sup> Lown, J. W.; Weir, G. L. *Can. J. Chem.* **1978**, *58*, 249–255.

<sup>11</sup> Morales-Rios, M. S.; Santos-Sanchez, N.F.; Mora-Perez, Y.; Joseph-Nathan, P. *Heterocycles* **2004**, *63*, 1331–1142.

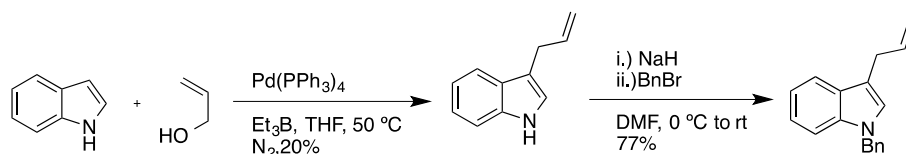

To a flame-dried flask under nitrogen containing indole (1g, 8.5 mmol, 1 eq) in THF (20 mL),  $\text{Ph}(\text{PPh}_3)_4$  (295 mg, 0.25 mmol, 0.03 eq) was added, followed by allyl alcohol (0.6 mL, 9.4 mmol, 1.1 eq) and  $\text{Et}_3\text{B}$  (1M in hexanes, 2.5 mL, 2.5 mmol, 0.3 eq). The reaction was stirred at 50 °C. When the reaction was determined to be complete via thin layer chromatographic analysis, the reaction was diluted with ethyl acetate. The mixture was then washed with saturated aqueous sodium bicarbonate (1x), followed by brine (1x). The organic layer was dried over anhydrous sodium sulfate and concentrated under rotary evaporation. The resulting residue was purified by silica gel chromatography (ethyl acetate/hexanes) to give 3-allylindole (260 mg, 20%). Next, to a flame-dried flask containing 3-allylindole (105 mg, 0.66 mmol, 1 eq.), dry DMF (1 mL) was added. The solution was cooled to 0 °C. Then, NaH (21 mg, 0.87 mmol, 1.3 eq.) in dry DMF (0.5 mL) was added dropwise. The reaction was stirred at 0 °C for 45 min. After 45 min, benzyl bromide (63  $\mu\text{L}$ , 1.0 mmol, 1.5 eq) was added dropwise. The reaction was allowed to warm to room temperature. Once reaction was determined to be complete via thin layer chromatographic analysis, the reaction was quenched with saturated aqueous ammonium chloride. The resulting mixture was washed with water (x3), followed by brine (x1). The organic layer was then dried over anhydrous sodium sulfate, filtered, and concentrated under vacuum. The crude reaction mixture was purified by silica gel chromatography (ethyl acetate/hexanes) to give N-benzyl-3-allylindole as a colorless oil (87.5 mg, 77 %).<sup>12</sup>

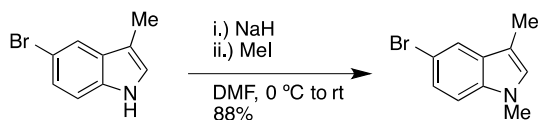

Following general procedure B as described above, a mixture of 5-bromo-3-methylindole (180 mg, 0.86 mmol, 1 eq.), NaH (62 mg, 2.58 mmol, 3 eq.), and MeI (107  $\mu\text{L}$ , 1.72 mmol, 2 eq) in dry DMF (2 mL) afforded 5-bromo-1,3-dimethylindole as a colorless oil (168 mg, 88 %).<sup>13</sup>

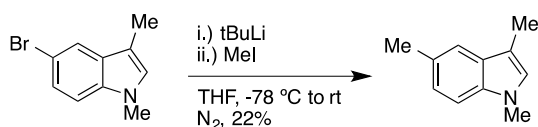

To a flame-dried round bottom flask under nitrogen containing 1,3-dimethyl-5-bromoindole (80 mg, 0.35 mmol, 1 eq) in dry THF (1.5 mL) at -78 °C, *t*-BuLi in 18% hexanes (480  $\mu\text{L}$ , 0.89 mmol, 2.5 eq) was added dropwise. The reaction was stirred for 15 min at -78 °C, then the reaction mixture was treated with MeI (27  $\mu\text{L}$ , 0.43, 1.2 eq). The reaction was then allowed to warm to room temperature and was stirred for 4 h. Once reaction was determined to be complete via thin layer chromatographic analysis, the reaction was quenched with saturated aqueous ammonium chloride. The mixture was extracted with ethyl acetate (x3), then dried over anhydrous sodium sulfate, filtered, and concentrated under rotary evaporation. The resulting residue was purified by silica gel chromatography (ethyl acetate/hexanes) to afford 1,3,5-trimethylindole as a colorless oil (56 mg, 22%).<sup>13</sup>

<sup>12</sup> Kimura, M.; Futamata, M.; Mukai, K.; Tamaru, Y. *J. Am. Chem. Soc.* **2005**, *127*, 4592–4593.

<sup>13</sup> Repka, L. M.; Ni, J.; Reisman, S. E. *J. Am. Chem. Soc.* **2010**, *132*, 14418–14420.



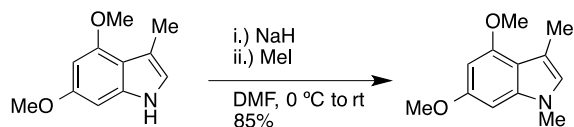

Following general procedure B as described above, a mixture of 3-methyl-4,6-dimethoxyindole (300 mg, 1.57 mmol, 1 eq.), NaH (113 mg, 4.71 mmol, 3 eq), and MeI (147  $\mu$ L, 2.35 mmol, 1.5 eq) in dry DMF (3.5 mL) afforded 4,5-dimethoxy-1,3-dimethylindole as a colorless oil (272 mg, 85 %).<sup>14</sup>

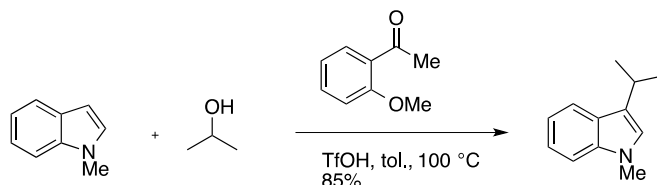

To a round bottom flask containing 1-methylindole (125  $\mu$ L, 1 mmol, 1 eq) in toluene (5 mL), isopropanol (150  $\mu$ L, 2 mmol, 2 eq) and 2-methoxyacetophenone (10  $\mu$ L, 0.05 mmol, 0.05 eq) was added, followed by triflic acid (9  $\mu$ L, 0.1 mmol, 0.1 eq). The reaction was then heated to 100 °C and stirred for 2 hours. Once the reaction was determined to be complete via thin layer chromatographic analysis, the reaction mixture was then warmed to room temperature and concentrated under vacuum. The resulting residue was purified by silica gel chromatography (ethyl acetate/hexanes) to afford 1-methyl-3-isopropylindole as a colorless oil (147 mg, 85%).<sup>15</sup>

### c. General Procedure C for (3+2) Annulation reaction

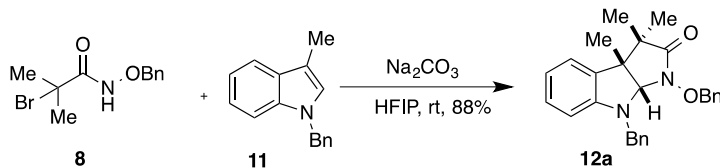

To a solution of indole **11** (37 mg, 0.25 mmol, 1 eq.) in HFIP (1 mL),  $\alpha$ -haloamide **8** (137 mg, 0.5 mmol, 2 eq.) and  $\text{Na}_2\text{CO}_3$  (106 mg, 1 mmol, 4 eq.) was added. The reaction was stirred at room temperature. Once the reaction was complete as judged by thin layer chromatography analysis, the reaction mixture was diluted with ethyl acetate, filtered through celite and washed with ethyl acetate. The filtrate was then concentrated under rotary evaporation. The resulting residue was purified by silica gel chromatography (ethyl acetate/hexane) to afford indoline **12a** as a colorless oil (84 mg, 88%).

<sup>1</sup>H NMR (600 MHz,  $\text{CD}_2\text{Cl}_2$ ):  $\delta$ , ppm 7.27–7.15 (10H, m), 6.93 (2H, ddd,  $J = 7.2, 7.2, 14.8$  Hz), 6.61 (1H, t,  $J = 7.5$  Hz), 6.25 (1H, d,  $J = 7.9$  Hz), 5.24 (2H, d,  $J = 8.2$  Hz), 4.98 (1H, d,  $J = 10.9$  Hz), 4.82 (1H, d,  $J = 10.0$  Hz), 4.54 (2H, d,  $J = 17.3$  Hz), 4.37 (1H, d,  $J = 17.3$  Hz), 1.13 (3H, s), 1.10 (3H, s), 0.95 (3H, s).

<sup>13</sup>C NMR (150 MHz,  $\text{CD}_2\text{Cl}_2$ ): 174.1, 149.7, 138.3, 135.1, 132.3, 129.6, 128.8, 128.6, 128.5, 128.3, 127.2, 127.1, 124.3, 118.2, 107.4, 86.0, 76.7, 53.8, 51.5, 43.5, 24.1, 21.7, 21.6.

IR (film,  $\text{cm}^{-1}$ ), 3396, 2973, 1698, 1605, 1486, 1285, 744, 699.

HRMS (ESI) calcd. for  $\text{C}_{27}\text{H}_{28}\text{N}_2\text{O}_2$  ( $m/z$   $\text{M}+\text{H}^+$ ): 413.2229, found: 413.2224.

<sup>14</sup> Keawin, T.; Rajviroongit, S.; Black, D. S. *Tetrahedron* **2006**, *61*, 863–861.

<sup>15</sup> Han, X.; Wu, J. *Angew. Chem. Int. Ed.* **2013**, *52*, 4637–4640.

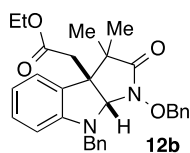

By following the general procedure C described above, a mixture of N-benzyl-3-ethyl acetate (73 mg, 0.25 mmol),  $\alpha$ -haloamide **8** (137 mg, 0.5 mmol), and  $\text{Na}_2\text{CO}_3$  (106 mg, 1 mmol) in HFIP (1 mL) afforded indoline **12b** as a colorless oil (78 mg, 65 %).

**$^1\text{H NMR}$**  (600 MHz,  $\text{CD}_2\text{Cl}_2$ ):  $\delta$ , ppm 7.46–7.35 (10H, m), 7.32 (1H, dd,  $J = 7.1, 7.1$  Hz), 7.07 (1H, ddd,  $J = 7.9, 7.9, 1.1$  Hz), 7.03 (1H, d,  $J = 6.8$  Hz), 6.73 (1H, dd,  $J = 7.4, 7.4$  Hz), 6.34 (1H, d,  $J = 8.0$  Hz), 5.26 (1H, s), 5.13 (1H, d,  $J = 12.6$  Hz), 4.92 (1H, d,  $J = 11.4$  Hz), 4.66 (1H, d,  $J = 16.7$  Hz), 4.50 (1H, d,  $J = 16.7$  Hz), 3.93 (2H, q,  $J = 7.1$  Hz), 2.87 (1H, d,  $J = 15.3$  Hz), 2.50 (1H, d,  $J = 15.5$  Hz), 1.26 (3H, s), 1.07 (6H, t,  $J = 8.7$  Hz).

**$^{13}\text{C NMR}$**  (150 MHz,  $\text{CD}_2\text{Cl}_2$ ): 173.8, 170.2, 151.1, 138.5, 135.0, 129.6, 128.9, 128.8, 128.7, 128.5, 128.4, 127.2, 127.0, 124.3, 118.0, 107.3, 84.6, 76.6, 60.4, 52.7, 44.0, 39.0, 25.4, 23.7, 21.3, 13.7.

**IR** (film,  $\text{cm}^{-1}$ ): 3437, 3061, 2979, 1712, 1605, 1488, 1186, 746, 700.

**HRMS (ESI) calcd. for  $\text{C}_{30}\text{H}_{32}\text{N}_2\text{O}_4$  ( $m/z$   $\text{M}+\text{H}^+$ ): 485.2440, found: 485.2444.**

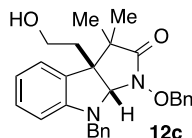

By following the general procedure C described above, a mixture of N-benzyl-tryptophol (63 mg, 0.25 mmol),  $\alpha$ -haloamide **8** (137 mg, 0.5 mmol), and  $\text{Na}_2\text{CO}_3$  (106 mg, 1 mmol) in HFIP (1 mL) afforded indoline **12c** as a white solid (70 mg, 63%).

**$^1\text{H NMR}$**  (600 MHz,  $\text{CD}_2\text{Cl}_2$ ):  $\delta$ , ppm 7.29–7.17 (10H, m), 6.98 (1H, ddd,  $J = 7.7, 7.7, 1.0$  Hz), 6.89 (1H, d,  $J = 7.1$  Hz), 6.62 (1H, dd,  $J = 7.4, 7.4$  Hz), 6.32 (1H, d,  $J = 7.9$  Hz), 4.98 (1H, d,  $J = 10.5$  Hz), 4.81 (1H, d,  $J = 10.5$  Hz), 4.80 (1H, s), 4.53 (1H, d,  $J = 15.5$  Hz), 4.37 (1H, d,  $J = 16.0$  Hz), 3.15 (1H, ddd,  $J = 5.8, 10.8, 13.2$  Hz), 3.07 (1H, ddd,  $J = 11.9, 11.9, 6.9$  Hz), 1.93 (1H, ddd,  $J = 5.8, 8.0, 14.1$  Hz), 1.63 (1H, ddd,  $J = 6.6, 7.7, 14.3$  Hz), 1.12 (3H, s), 0.95 (3H, s).

**$^{13}\text{C NMR}$**  (150 MHz,  $\text{CD}_2\text{Cl}_2$ ): 173.8, 150.4, 138.0, 135.1, 129.7, 129.0, 128.8, 128.6, 128.5, 128.4, 127.5, 127.2, 125.0, 118.2, 107.7, 82.9, 76.5, 59.4, 54.0, 51.4, 44.1, 36.3, 24.1, 21.9.

**IR** (film,  $\text{cm}^{-1}$ ): 3419, 3062, 2976, 2359, 1686, 1485, 1265, 1037, 734.

**MELTING POINT:** 48.1–48.4 °C

**HRMS (ESI) calcd. for  $\text{C}_{28}\text{H}_{30}\text{N}_2\text{O}_3$  ( $m/z$   $\text{M}+\text{H}^+$ ): 443.2335, found: 443.2338.**

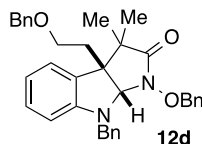

By following the general procedure C described above, a mixture of N-benzyl-O-benzyl tryptophol (85 mg, 0.25 mmol),  $\alpha$ -haloamide **8** (137 mg, 0.5 mmol), and  $\text{Na}_2\text{CO}_3$  (106 mg, 1 mmol) in HFIP (1 mL) afforded indoline **12d** as a colorless oil (83 mg, 62%).

**<sup>1</sup>H NMR** (600 MHz, CD<sub>2</sub>Cl<sub>2</sub>): δ, ppm 7.26–7.14 (13H, m), 7.09 (2H, dd, J = 2.1, 7.5 Hz), 6.98 (1H, ddd, J = 7.7, 7.7, 1.5 Hz), 6.86 (1H, dd, J = 1.2, 7.3 Hz), 6.62 (1H, ddd, J = 7.5, 7.5, 1.0 Hz), 6.28 (1H, d, J = 7.6 Hz), 4.93 (1H, d, J = 11.7 Hz), 4.83 (1H, s), 4.79 (1H, d, J = 9.9 Hz), 4.46 (1H, d, J = 14.4 Hz), 4.27 (1H, d, J = 14.4 Hz), 4.12 (2H, dd, J = 9.5, 25.7 Hz), 3.03 (1H, ddd, J = 5.3, 7.9, 9.2 Hz), 2.95 (1H, ddd, J = 6.9, 7.9, 9.2 Hz), 2.02 (1H, ddd, J = 5.1, 7.9, 14.0 Hz), 1.73 (1H, ddd, J = 6.2, 7.7, 14.0 Hz), 1.11 (3H, s), 0.91 (3H, s).

**<sup>13</sup>C NMR** (150 MHz, CD<sub>2</sub>Cl<sub>2</sub>): 173.9, 150.7, 138.4, 138.2, 135.1, 129.6, 128.9, 128.8, 128.6, 128.5, 128.4, 128.2, 127.5, 127.4, 127.1, 124.8, 118.2, 118.0, 107.5, 83.3, 76.5, 72.9, 67.4, 54.1, 51.7, 44.2, 33.6, 24.6, 21.6.

**IR** (film, cm<sup>-1</sup>): 3418, 2985, 2252, 1696, 1643, 1265, 907, 732, 649.

**HRMS (ESI) calcd. for C<sub>35</sub>H<sub>36</sub>N<sub>2</sub>O<sub>3</sub> (m/z M+H<sup>+</sup>): 533.2804, found: 533.2808.**

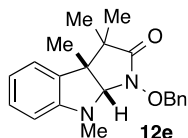

By following the general procedure C described above, a mixture of N-benzyl-3-methylindole (50 mg, 0.225 mmol), α-haloamide **8** (123 mg, 0.452 mmol), and Na<sub>2</sub>CO<sub>3</sub> (95.7 mg, 0.903 mmol) in HFIP afforded indoline **12e** (118 mg, 93%) as a colorless oil.

**<sup>1</sup>H NMR** (600 MHz, CD<sub>2</sub>Cl<sub>2</sub>): δ, ppm 7.52 (2H, dd, J = 1.8, 7.6 Hz), 7.49–7.40 (3H, m), 7.16 (1H, ddd, J = 7.7, 7.7, 1.0 Hz), 7.01 (1H, d, J = 7.6 Hz), 6.74 (1H, t, J = 7.7 Hz), 6.49 (1H, d, J = 7.9 Hz), 5.15 (1H, d, J = 10.7 Hz), 5.03 (1H, d, J = 11.5 Hz), 4.41 (1H, s), 2.98 (3H, s), 1.26 (3H, s), 1.23 (3H, s), 1.00 (3H, s).

**<sup>13</sup>C NMR** (150 MHz, CD<sub>2</sub>Cl<sub>2</sub>): 174.1, 150.7, 135.3, 132.2, 129.6, 128.9, 128.5, 128.4, 124.0, 118.1, 107.1, 88.0, 76.8, 51.3, 43.5, 34.6, 24.1, 21.9, 21.4.

**IR** (film, cm<sup>-1</sup>): 3434, 2972, 1707, 1605, 1488, 1282, 1089, 1020, 746.

**HRMS (ESI) calcd. for C<sub>21</sub>H<sub>24</sub>N<sub>2</sub>O<sub>2</sub> (m/z M+H<sup>+</sup>): 337.1916, found: 337.1911.**

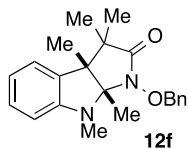

By following the general procedure C described above, a mixture of 1,2,3-trimethylindole (40 mg, 0.25 mmol), α-haloamide **8** (137 mg, 0.5 mmol), and Na<sub>2</sub>CO<sub>3</sub> (106 mg, 1 mmol) in HFIP (1 mL) afforded indoline **12f** as a colorless oil (38 mg, 42%).

**<sup>1</sup>H NMR** (600 MHz, CD<sub>2</sub>Cl<sub>2</sub>): δ, ppm 7.37 (2H, dd, J = 1.7, 7.4 Hz), 7.32–7.27 (3H, m), 7.02 (1H, ddd, J = 7.8, 7.8, 1.4 Hz), 6.95 (1H, dd, J = 1.2, 7.4 Hz), 6.59 (1H, dd, J = 7.6, 7.6 Hz), 6.29 (1H, d, J = 8.1 Hz), 4.98 (1H, d, J = 9.7 Hz), 4.83 (1H, d, J = 9.8 Hz), 2.83 (3H, s), 1.38 (3H, s), 1.16 (3H, s), 1.13 (3H, s), 1.05 (3H, s).

**<sup>13</sup>C NMR** (150 MHz, CD<sub>2</sub>Cl<sub>2</sub>): 173.7, 149.0, 135.2, 132.2, 129.3, 128.6, 128.4, 128.3, 125.0, 117.3, 105.9, 87.7, 78.2, 77.4, 43.2, 29.3, 23.9, 22.6, 18.3, 16.0.

**IR** (film, cm<sup>-1</sup>): 3419, 3053, 2986, 1698, 1604, 1491, 1265, 1104, 1039, 737, 702.

**HRMS (ESI) calcd. for C<sub>22</sub>H<sub>26</sub>N<sub>2</sub>O<sub>2</sub> (m/z M+H<sup>+</sup>): 351.2073, found: 351.2071.**

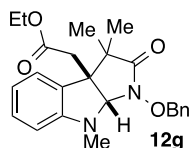

By following the general procedure C described above, a mixture of N-methyl-3-indole-ethyl acetate (54 mg, 0.25 mmol),  $\alpha$ -haloamide **8** (137 mg, 0.5 mmol), and  $\text{Na}_2\text{CO}_3$  (106 mg, 1 mmol) in HFIP (1 mL) afforded indoline **12g** as a colorless oil (69 mg, 68%).

**$^1\text{H}$  NMR** (600 MHz,  $\text{CD}_2\text{Cl}_2$ ):  $\delta$ , ppm 7.40 (2H, dd,  $J = 1.5, 7.2$  Hz), 7.34–7.27 (3H, m), 7.04 (1H, ddd,  $J = 7.8, 7.8, 1.3$  Hz), 6.86 (1H, d,  $J = 7.6$  Hz), 6.59 (1H, dd,  $J = 7.6, 7.6$  Hz), 6.34 (1H, d,  $J = 8.3$  Hz), 5.06 (1H, d,  $J = 9.7$  Hz), 4.93 (2H, d,  $J = 11.9$  Hz), 4.92 (2H, s), 3.77 (2H, dq,  $J = 2.2, 7.2$  Hz), 2.87 (3H, s), 2.71 (1H, d,  $J = 15.2$  Hz), 2.36 (1H, d,  $J = 15.2$  Hz), 1.11 (3H, s), 0.91 (3H, t,  $J = 7.0$  Hz), 0.89 (3H, s).

**$^{13}\text{C}$  NMR** (150 MHz,  $\text{CD}_2\text{Cl}_2$ ): 173.4, 170.1, 151.6, 135.2, 129.6, 128.9, 128.8, 128.6, 128.5, 124.5, 117.7, 107.1, 85.6, 76.4, 60.3, 53.1, 43.8, 39.2, 34.9, 29.6, 24.9, 21.6, 13.6.

**IR** (film,  $\text{cm}^{-1}$ ): 3427, 2979, 2878, 1708, 1644, 1607, 1490, 1283, 1184, 1028, 736, 700.

**HRMS (ESI) calcd. for  $\text{C}_{24}\text{H}_{28}\text{N}_2\text{O}_4$  ( $m/z$   $\text{M}+\text{H}^+$ ): 409.2127, found: 409.2130.**

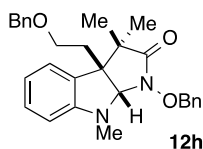

By following the general procedure C described above, a mixture of O-benzyl-N-methyltryptophol (66 mg, 0.25 mmol),  $\alpha$ -haloamide **8** (137 mg, 0.5 mmol), and  $\text{Na}_2\text{CO}_3$  (106 mg, 1 mmol) in HFIP (1 mL) afforded indoline **12h** as a colorless oil (86 mg, 76%).

**$^1\text{H}$  NMR** (600 MHz,  $\text{CD}_2\text{Cl}_2$ ):  $\delta$ , ppm 7.35 (2H, q,  $J = 3.3$  Hz), 7.32–7.25 (3H, m), 7.21 (2H, dd,  $J = 7.2, 7.2$  Hz), 7.16 (1H, dd,  $J = 7.4, 7.4$  Hz), 7.09 (2H, d,  $J = 7.4$  Hz), 7.04 (1H, ddd,  $J = 7.6, 7.6, 1.2$  Hz), 6.83 (1H, d,  $J = 7.4$  Hz), 6.60 (1H, dd,  $J = 7.4, 7.4$  Hz), 6.34 (1H, d,  $J = 7.8$  Hz), 4.97 (1H, d,  $J = 10.9$  Hz), 4.86 (1H, d,  $J = 12.0$  Hz), 4.67 (1H, s), 4.15 (2H, dd,  $J = 12.6, 18.3$  Hz), 3.06 (1H, ddd,  $J = 5.3, 7.2, 9.4$  Hz), 2.98 (1H, ddd,  $J = 7.1, 7.1, 9.3$  Hz), 2.79 (3H, s), 1.95 (1H, ddd,  $J = 5.1, 6.9, 14.0$  Hz), 1.79 (1H, ddd,  $J = 7.1, 7.1, 14.3$  Hz), 1.11 (3H, s), 0.91 (3H, s).

**$^{13}\text{C}$  NMR** (150 MHz,  $\text{CD}_2\text{Cl}_2$ ): 173.7, 151.3, 138.4, 135.3, 129.6, 129.0, 128.9, 128.6, 128.5, 128.2, 127.6, 127.5, 127.4, 124.9, 117.8, 107.0, 85.1, 76.7, 72.9, 67.3, 54.2, 44.0, 34.3, 33.6, 24.1, 22.2.

**IR** (film,  $\text{cm}^{-1}$ ): 3440, 3060, 3030, 2973, 2871, 1706, 1604, 1490, 1282, 1097, 1026, 744, 699.

**HRMS (ESI) calcd. for  $\text{C}_{29}\text{H}_{32}\text{N}_2\text{O}_3$  ( $m/z$   $\text{M}+\text{H}^+$ ): 457.2491, found: 457.2497.**

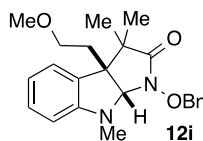

By following the general procedure C described above, a mixture of N, O-dimethyl-tryptophol (47 mg, 0.25 mmol),  $\alpha$ -haloamide **8** (137 mg, 0.5 mmol), and  $\text{Na}_2\text{CO}_3$  (106 mg, 1 mmol) in HFIP (1 mL) afforded indoline **12i** as a colorless oil (62 mg, 66%).

**$^1\text{H}$  NMR** (600 MHz,  $\text{CD}_2\text{Cl}_2$ ):  $\delta$ , ppm 7.39 (2H, dd,  $J = 1.7, 7.1$  Hz), 7.34–7.28 (3H, m), 7.05 (1H, ddd,  $J = 7.6, 7.6, 1.1$  Hz), 6.85 (1H, dd,  $J = 1.0, 7.3$  Hz), 6.61 (1H, ddd,  $J = 7.4, 7.4, 0.7$  Hz), 6.35 (1H, d,  $J =$

7.3 Hz), 5.01 (1H, d,  $J = 11.1$  Hz), 4.89 (1H, d,  $J = 10.0$  Hz), 4.61, (1H, s), 3.01 (3H, s), 2.91 (1H, ddd,  $J = 5.2, 7.7, 9.5$  Hz), 2.86 (3H, s), 2.81 (1H, ddd,  $J = 7.1, 7.1, 9.4$  Hz), 1.89 (1H, ddd,  $J = 5.9, 8.3, 13.3$  Hz), 1.75 (1H, ddd,  $J = 7.2, 7.2, 14.1$  Hz), 1.13 (3H, s), 0.94 (3H, s).

$^{13}\text{C}$  NMR (150 MHz,  $\text{CD}_2\text{Cl}_2$ ): 173.6, 151.2, 135.3, 129.6, 129.1, 128.8, 128.6, 128.5, 125.0, 117.8, 107.0, 85.0, 76.6, 69.4, 58.2, 54.2, 43.9, 34.4, 33.6, 23.9, 22.2.

IR (film,  $\text{cm}^{-1}$ ): 3438, 3053, 2975, 2927, 2877, 2832, 2810, 1703, 1604, 1490, 1282, 1115, 1026, 745, 700.

HRMS (ESI) calcd. for  $\text{C}_{23}\text{H}_{28}\text{N}_2\text{O}_3$  ( $m/z$   $\text{M}+\text{H}^+$ ): 381.2178, found: 381.2177.

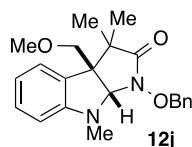

By following the general procedure C described above, a mixture of N-methyl-tryptophol (44 mg, 0.25 mmol),  $\alpha$ -haloamide **8** (137 mg, 0.5 mmol), and  $\text{Na}_2\text{CO}_3$  (106 mg, 1 mmol) in HFIP (1 mL) afforded indoline **12j** as a white solid (57 mg, 63%).

$^1\text{H}$  NMR (600 MHz,  $\text{CD}_2\text{Cl}_2$ ):  $\delta$ , ppm 7.41 (2H, dd,  $J = 1.3, 8.4$  Hz), 7.35–7.28 (3H, m), 7.06 (1H, ddd,  $J = 7.7, 7.7, 1.1$  Hz), 6.86 (1H, dd,  $J = 0.8, 7.3$  Hz), 6.61 (1H, ddd,  $J = 7.4, 7.4, 0.7$  Hz), 6.37 (1H, d,  $J = 8.1$  Hz), 5.02 (1H, d,  $J = 11.4$  Hz), 4.95 (1H, d,  $J = 10.5$  Hz), 4.70 (1H, s), 3.42 (2H, dd,  $J = 9.1, 24.1$  Hz), 3.17 (3H, s), 2.83 (3H, s), 1.15 (3H, s), 0.80 (3H, s).

$^{13}\text{C}$  NMR (150 MHz,  $\text{CD}_2\text{Cl}_2$ ): 174.5, 152.0, 135.5, 129.5, 128.8, 128.7, 128.4, 128.1, 123.7, 118.0, 107.3, 84.5, 76.8, 74.4, 58.7, 55.5, 42.7, 35.0, 29.6, 25.6, 19.2.

IR (film,  $\text{cm}^{-1}$ ): 3425, 2924, 2095, 1642, 1488, 1278, 1095, 1024, 745, 698.

MELTING POINT: 59.9–60.8  $^\circ\text{C}$

HRMS (ESI) calcd. for  $\text{C}_{22}\text{H}_{26}\text{N}_2\text{O}_3$  ( $m/z$   $\text{M}+\text{H}^+$ ): 367.2022, found: 367.2015.

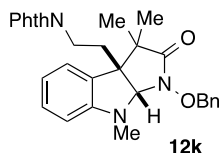

By following the general procedure C described above, a mixture of N-methyl-N'-phthalimide-tryptamine (76 mg, 0.25 mmol),  $\alpha$ -haloamide **8** (137 mg, 0.5 mmol), and  $\text{Na}_2\text{CO}_3$  (106 mg, 1 mmol) in HFIP (1 mL) afforded indoline **12k** as a yellow solid (66 mg, 54%).

$^1\text{H}$  NMR (600 MHz,  $\text{CD}_2\text{Cl}_2$ ):  $\delta$ , ppm 7.64–7.61 (2H, m), 7.61–7.57 (2H, m), 7.43 (2H, d,  $J = 7.5$  Hz), 7.36–7.29 (3H, m), 6.91 (1H, ddd,  $J = 7.7, 7.7, 0.9$  Hz), 6.88 (1H, d,  $J = 7.6$  Hz), 6.30 (1H, d,  $J = 7.2$  Hz), 6.47 (1H, dd,  $J = 7.9, 7.9$  Hz), 5.06 (1H, d,  $J = 10.1$  Hz), 4.93 (1H, d,  $J = 10.6$  Hz), 4.79 (1H, s), 3.29 (1H, ddd,  $J = 4.1, 10.3, 14.2$  Hz), 3.13 (1H, ddd,  $J = 6.9, 9.3, 13.9$  Hz), 2.91 (3H, s), 2.19 (1H, ddd,  $J = 7.3, 10.2, 13.8$  Hz), 1.66 (1H, ddd,  $J = 4.1, 9.6, 13.6$  Hz), 1.10 (3H, s), 0.88 (3H, s).

$^{13}\text{C}$  NMR (150 MHz,  $\text{CD}_2\text{Cl}_2$ ): 173.6, 167.7, 151.1, 135.2, 133.7, 132.0, 129.6, 128.9, 128.7, 128.6, 128.1, 124.5, 122.8, 118.0, 107.2, 84.3, 76.8, 54.0, 44.2, 34.3, 34.2, 31.6, 24.1, 21.5.

IR (film,  $\text{cm}^{-1}$ ): 3424, 3058, 2974, 1770, 1709, 1489, 1401, 1372, 1286, 1034, 732.

MELTING POINT: 95.2–96.7  $^\circ\text{C}$

HRMS (ESI) calcd. for  $\text{C}_{30}\text{H}_{29}\text{N}_3\text{O}_4$  ( $m/z$   $\text{M}+\text{H}^+$ ): 496.2236, found: 496.2241.

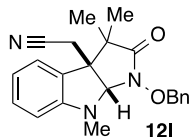

By following the general procedure C described above, a mixture of N-methylindole-3-acetonitrile (43 mg, 0.25 mmol),  $\alpha$ -haloamide **8** (137 mg, 0.5 mmol), and  $\text{Na}_2\text{CO}_3$  (106 mg, 1 mmol) in HFIP (1 mL) afforded indoline **12l** as a white solid (67 mg, 75%).

**$^1\text{H NMR}$**  (500 MHz,  $\text{CD}_2\text{Cl}_2$ ):  $\delta$ , ppm 7.52 (2H, ddd,  $J = 3.3, 3.3, 3.3$  Hz), 7.47 (3H, ddd,  $J = 4.2, 4.2, 1.7$  Hz), 7.27 (1H, ddd,  $J = 7.6, 7.6, 1.3$  Hz), 7.19 (1H, dd,  $J = 0.9, 7.5$  Hz), 6.83 (1H, ddd,  $J = 7.6, 7.6, 1.1$  Hz), 6.57 (1H, d,  $J = 7.7$  Hz), 5.19 (1H, d,  $J = 11.7$  Hz), 5.04 (1H, d,  $J = 11.7$  Hz), 4.64 (1H, s), 3.04 (3H, s), 2.78 (1H, d,  $J = 18.4$  Hz), 2.50 (1H, d,  $J = 18.4$  Hz), 1.31 (3H, s), 1.17 (3H, s).

**$^{13}\text{C NMR}$**  (150 MHz,  $\text{CD}_2\text{Cl}_2$ ): 172.4, 150.4, 134.8, 129.8, 129.7, 129.1, 128.6, 127.4, 124.7, 118.5, 116.8, 107.7, 85.0, 76.9, 52.7, 43.4, 34.2, 24.0, 23.9, 21.8.

**IR** (film,  $\text{cm}^{-1}$ ): 3435, 3056, 2978, 2879, 2252, 1705, 1606, 1490, 1283, 1030, 987, 735, 700.

**MELTING POINT**: 94.8–95.2 °C

**HRMS (ESI) calcd. for  $\text{C}_{22}\text{H}_{23}\text{N}_3\text{O}_2$  ( $m/z$   $\text{M}+\text{H}^+$ ): 362.1869, found: 362.1870.**

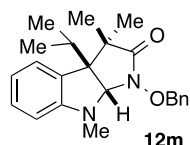

By following the general procedure C described above, a mixture of N-methyl-3-isopropylindole (39 mg, 0.25 mmol),  $\alpha$ -haloamide **8** (137 mg, 0.5 mmol), and  $\text{Na}_2\text{CO}_3$  (106 mg, 1 mmol) in HFIP (1 mL) afforded indoline **12m** as a colorless oil (45 mg, 54 %).

**$^1\text{H NMR}$**  (600 MHz,  $\text{CD}_2\text{Cl}_2$ ):  $\delta$ , ppm 7.39 (2H, dd,  $J = 2.3, 7.3$  Hz), 7.35–7.29 (3H, m), 7.06 (1H, ddd,  $J = 7.7, 7.7, 1.2$  Hz), 6.91 (1H, d,  $J = 7.5$  Hz), 6.61 (1H, dd,  $J = 7.5, 7.5$  Hz), 6.35 (1H, d,  $J = 8.6$  Hz), 5.02 (1H, d,  $J = 10.0$  Hz), 4.88 (1H, d,  $J = 10.0$  Hz), 4.54 (1H, s), 2.87 (3H, s), 2.21–2.10 (1H, m), 1.20 (4H, s), 1.03 (3H, s), 0.74 (3H, d,  $J = 8.5$  Hz), 0.58 (3H, d,  $J = 6.3$  Hz).

**$^{13}\text{C NMR}$**  (150 MHz,  $\text{CD}_2\text{Cl}_2$ ): 174.6, 151.3, 135.3, 129.4, 128.7, 128.5, 128.4, 128.1, 125.9, 117.4, 106.8, 83.4, 76.8, 59.2, 44.0, 34.0, 30.9, 25.5, 21.3, 18.8, 17.5.

**IR** (film,  $\text{cm}^{-1}$ ): 3461, 2972, 2872, 1706, 1605, 1488, 1281, 1105, 1020, 745, 700.

**HRMS (ESI) calcd. for  $\text{C}_{21}\text{H}_{24}\text{N}_2\text{O}_2$  ( $m/z$   $\text{M}+\text{H}^+$ ): 337.1916, found: 337.1916.**

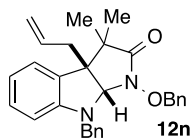

By following the general procedure C described above, a mixture of N-benzyl-3-allylindole (61mg, 0.25 mmol),  $\alpha$ -haloamide **8** (137 mg, 0.5 mmol), and  $\text{Na}_2\text{CO}_3$  (106 mg, 1 mmol) in HFIP (1 mL) afforded indoline **12n** as a colorless oil (27 mg, 25%).

**$^1\text{H NMR}$**  (600 MHz,  $\text{CDCl}_3$ ):  $\delta$ , ppm 7.36–7.24 (10H, m), 7.04 (1H, ddd,  $J = 7.6, 7.6, 0.8$  Hz), 6.99 (1H, dd,  $J = 0.9, 7.3$  Hz), 6.71 (1H, ddd,  $J = 7.4, 7.4, 1.0$  Hz), 6.35 (1H, d,  $J = 8.3$  Hz), 5.29–5.21 (1H, m), 5.06 (1H, d,  $J = 11.4$  Hz), 4.86 (3H, ddd,  $J = 13.0, 13.0, 3.4$  Hz), 4.81 (1H, s), 4.60 (1H, d,  $J = 19.4$

Hz), 4.43 (1H, d,  $J = 14.8$  Hz), 2.63 (1H, dd,  $J = 5.1, 14.3$  Hz), 2.17 (1H, q,  $J = 7.6$  Hz), 1.25 (3H, s), 1.02 (3H, s).

$^{13}\text{C NMR}$  (150 MHz,  $\text{CD}_2\text{Cl}_2$ ): 174.2, 151.0, 138.1, 135.2, 134.2, 129.6, 128.9, 128.6, 128.5, 127.5, 127.1, 124.7, 118.6, 118.1, 107.4, 82.9, 76.6, 55.0, 51.7, 44.0, 38.7, 25.1, 21.2.

**IR** (film,  $\text{cm}^{-1}$ ): 3433, 3062, 2936, 2869, 1706, 1606, 1266, 1027, 949, 736, 699.

**HRMS (ESI) calcd. for  $\text{C}_{29}\text{H}_{30}\text{N}_2\text{O}_2$  ( $m/z$   $\text{M}+\text{H}^+$ ): 439.2386, found: 439.2383.**

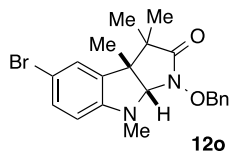

By following the general procedure C described above, a mixture of N-methyl-3-methyl-5-bromoindole (56 mg, 0.25 mmol),  $\alpha$ -haloamide **8** (137 mg, 0.5 mmol), and  $\text{Na}_2\text{CO}_3$  (106 mg, 1 mmol) in HFIP (1 mL) afforded indoline **12o** as a yellow oil (77 mg, 72%).

$^1\text{H NMR}$  (600 MHz,  $\text{CD}_2\text{Cl}_2$ ):  $\delta$ , ppm 7.47 (2H, dd,  $J = 1.9, 7.3$  Hz), 7.40–7.38 (3H, m), 7.21 (1H, dd,  $J = 2.1, 8.9$  Hz), 7.05 (1H, d,  $J = 1.8$  Hz), 6.30 (1H, d,  $J = 8.4$  Hz), 5.01 (1H, d,  $J = 10.5$  Hz), 4.97 (1H, d,  $J = 10.5$  Hz), 4.35 (1H, s), 2.92 (3H, s), 1.18 (3H, s), 1.17 (3H, s), 0.98 (3H, s).

$^{13}\text{C NMR}$  (150 MHz,  $\text{CD}_2\text{Cl}_2$ ): 173.8, 149.7, 135.2, 134.6, 131.1, 129.7, 129.0, 128.6, 127.0, 109.6, 108.5, 87.9, 76.9, 51.4, 43.4, 34.4, 24.1, 21.7, 21.5.

**IR** (film,  $\text{cm}^{-1}$ ): 3429, 3054, 2978, 2937, 2875, 2304, 1706, 1600, 1487, 1266, 1018, 808, 734, 701.

**HRMS (ESI) calcd. for  $\text{C}_{21}\text{H}_{23}\text{N}_2\text{O}_2\text{Br}$  ( $m/z$   $\text{M}+\text{H}^+$ ): 415.1021, found: 415.1022.**

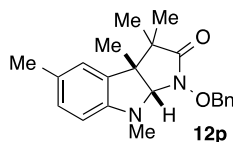

By following the general procedure C described above, a mixture of 1,3,5-trimethylindole (39 mg, 0.25 mmol),  $\alpha$ -haloamide **8** (137 mg, 0.5 mmol), and  $\text{Na}_2\text{CO}_3$  (106 mg, 1 mmol) in HFIP (1 mL) afforded indoline **12p** as a colorless oil (56 mg, 65%).

$^1\text{H NMR}$  (600 MHz,  $\text{CD}_2\text{Cl}_2$ ):  $\delta$ , ppm 7.52 (2H, dd,  $J = 1.7, 7.6$  Hz), 7.47–7.41 (3H, m), 6.98 (1H, d,  $J = 8.2$  Hz), 6.83 (1H, s), 6.40 (1H, d,  $J = 8.2$  Hz), 5.16 (1H, d,  $J = 11.3$  Hz), 5.04 (1H, d,  $J = 10.0$  Hz), 4.37 (1H, s), 2.96 (3H, s), 2.28 (3H, s), 1.26 (3H, s), 1.22 (3H, s), 1.00 (3H, s).

$^{13}\text{C NMR}$  (150 MHz,  $\text{CD}_2\text{Cl}_2$ ): 174.2, 148.8, 135.3, 132.3, 129.6, 128.8, 128.6, 128.5, 127.6, 124.7, 107.1, 88.6, 76.8, 51.3, 43.4, 35.1, 24.3, 22.0, 21.2, 20.5.

**IR** (film,  $\text{cm}^{-1}$ ): 3461, 2973, 2933, 2689, 2300, 1706, 1616, 1498, 1455, 1373, 1278, 1093, 1019, 807, 749, 701.

**HRMS (ESI) calcd. for  $\text{C}_{22}\text{H}_{26}\text{N}_2\text{O}_2$  ( $m/z$   $\text{M}+\text{H}^+$ ): 351.2073, found: 351.2075.**

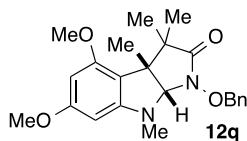

By following the general procedure C described above, a mixture of N-methyl-4, 6-dimethoxyindole (51 mg, 0.25 mmol),  $\alpha$ -haloamide **8** (137 mg, 0.5 mmol), and  $\text{Na}_2\text{CO}_3$  (106 mg, 1 mmol) in HFIP (1 mL) afforded indoline **12q** as a white solid (65 mg, 72%).

**<sup>1</sup>H NMR** (600 MHz, CD<sub>2</sub>Cl<sub>2</sub>): δ, ppm 7.41–7.38 (2H, m), 7.34–7.29 (3H, m), 5.79 (1H, d, J = 2.3 Hz), 5.61 (1H, d, J = 2.0 Hz), 5.03 (1H, d, J = 10.5 Hz), 4.94 (1H, d, J = 10.4 Hz), 4.14 (1H, s), 3.66 (6H, s), 2.78 (3H, s), 1.22 (3H, s), 1.13 (3H, s), 0.74 (3H, s).

**<sup>13</sup>C NMR** (150 MHz, CD<sub>2</sub>Cl<sub>2</sub>): 175.1, 162.1, 157.2, 153.7, 135.2, 129.6, 128.8, 128.5, 128.3, 126.8, 110.2, 89.8, 88.8, 87.0, 76.9, 55.2, 54.9, 50.8, 43.8, 35.3, 25.3, 22.3, 20.1.

**IR** (film, cm<sup>-1</sup>): 3447, 2971, 2938, 1707, 1609, 1455, 1208, 1149, 1058, 804, 746, 700.

**MELTING POINT**: 109.3–110.4°C

**HRMS (ESI) calcd. for** C<sub>23</sub>H<sub>28</sub>N<sub>2</sub>O<sub>4</sub> (*m/z* M+H<sup>+</sup>): 397.2127, found: 397.2129.

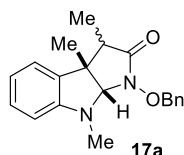

By following the general procedure C described above but at 50 °C, a mixture of 1,3-dimethylindole (108 mg, 0.75 mmol), α-haloamide **16a** (213 mg, 1.25 mmol), and Na<sub>2</sub>CO<sub>3</sub> (265 mg, 2.50 mmol) in HFIP (3 mL) afforded an inseparable 1:1 diastereomeric mixture of indoline **17a** as a colorless oil (131 mg, 54 %).

As a 1:1 diastereomer mixture:

**<sup>1</sup>H NMR** (600 MHz, CD<sub>2</sub>Cl<sub>2</sub>): δ, ppm 7.38 (4H, d, J = 8.0 Hz), 7.35–7.27 (5H, m), 7.23–7.14 (1H, m), 7.05–7.00 (2H, m), 6.88 (2H, d, J = 7.5 Hz), 6.61 (2H, dt, J = 4.3, 7.2 Hz), 6.34 (2H, t, J = 7.7 Hz), 5.00 (2H, dd, J = 10.5, 15.7 Hz), 4.87 (2H, dd, J = 3.8, 11.2 Hz), 4.33 (1H, s), 4.26 (1H, s), 2.87 (3H, s), 2.86 (3H, s), 2.48 (1H, q, J = 7.1 Hz), 2.33 (1H, q, J = 7.7 Hz), 1.24 (3H, s), 1.14 (3H, d, J = 9.8 Hz), 1.08 (3H, s), 0.95 (3H, d, J = 8.3 Hz).

**<sup>13</sup>C NMR** (150 MHz, CD<sub>2</sub>Cl<sub>2</sub>): ppm, 171.6, 171.5, 150.5, 149.4, 135.6, 135.3, 130.8, 129.7, 129.6, 128.94, 128.90, 128.6, 128.5, 128.4, 124.6, 121.8, 118.3, 117.8, 107.1, 107.0, 88.1, 87.9, 76.9, 48.0, 47.2, 44.2, 43.3, 34.3, 34.1, 26.6, 19.6, 13.7, 11.4.

**IR (film, cm<sup>-1</sup>):** 3460, 3032, 2973, 2301, 1708, 1607, 1490, 1276, 1058, 954, 747, 710.

**HRMS (ESI) calcd. for** C<sub>20</sub>H<sub>22</sub>N<sub>2</sub>O<sub>2</sub> (*m/z* M+H<sup>+</sup>): 323.1760, found: 323.1758.

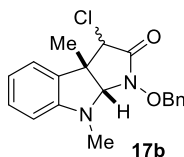

By following the general procedure C described above, a mixture of 1,3-dimethylindole (36 mg, 0.25 mmol), α-haloamide **16b** (137 mg, 0.5 mmol), and Na<sub>2</sub>CO<sub>3</sub> (106 mg, 1 mmol) in HFIP (1 mL) afforded a 1:1 diastereomeric mixture indoline **17b** as a colorless oil (36 mg, 42 %). Purification by silica gel flash chromatography provided an analytically pure sample of the following diastereomer.

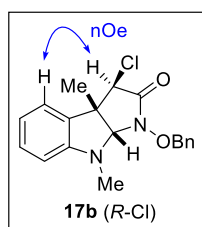

**<sup>1</sup>H NMR** (600 MHz, CD<sub>2</sub>Cl<sub>2</sub>): δ, ppm 7.54–7.50 (2H, m), 7.50–7.45 (3H, m), 7.21 (1H, ddd, J = 7.9, 7.9, 1.2 Hz), 7.08 (1H, d, J = 7.5 Hz), 6.79 (1H, dd, J = 7.3, 7.3 Hz), 6.50 (1H, d, J = 7.7 Hz), 5.12 (1H, d, J = 10.9 Hz), 4.99 (1H, d, J = 14.5 Hz), 4.56 (1H, s), 4.43 (1H, s), 2.98 (3H, s), 1.34 (3H, s).

**<sup>13</sup>C NMR** (150 MHz, CD<sub>2</sub>Cl<sub>2</sub>): 134.7, 130.0, 129.7, 129.2, 128.6, 122.7, 118.7, 107.4, 86.0, 76.7, 60.5, 33.2, 29.3, 20.8, 13.8.

**IR** (film, cm<sup>-1</sup>): 3418, 2926, 2851, 2196, 1721, 1640, 1609, 993, 711, 678.

**HRMS (ESI) calcd. for** C<sub>19</sub>H<sub>19</sub>ClN<sub>2</sub>O<sub>4</sub> (*m/z* M+H<sup>+</sup>): 343.1213, found: 343.1210.



#### d. General Procedure D for N–O bond cleavage reaction<sup>16</sup>

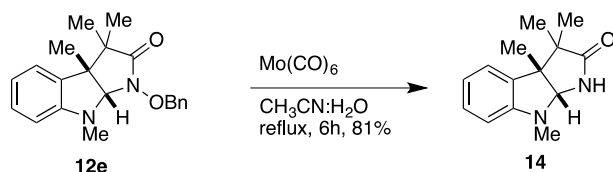

To a solution of indoline **12e** (100 mg, 0.2 mmol, 1 eq) in acetonitrile/water (9:1, 2 mL),  $\text{Mo}(\text{CO})_6$  (95 mg, 0.357 mmol, 1.2 eq) was added. The reaction was stirred at reflux for 6 h. Once the reaction was determined to be complete via thin layer chromatographic analysis, the reaction mixture was cooled to room temperature. The mixture was filtered through celite and washed with ethyl acetate. Then, filtrate was concentrated under rotary evaporation, and the resulting residue was purified by silica gel chromatography (ethyl acetate/hexane) to afford **14** as a white solid (41 mg, 81%).

**<sup>1</sup>H NMR** (600 MHz,  $\text{CD}_2\text{Cl}_2$ ):  $\delta$ , ppm 7.11 (1H, s), 7.03 (1H, ddd,  $J = 7.9, 7.9, 1.4$  Hz), 6.93 (1H, dd,  $J = 1.0, 7.2$  Hz), 6.62 (1H, ddd,  $J = 7.3, 7.3, 0.7$  Hz), 6.36 (1H, d,  $J = 7.4$  Hz), 4.55 (1H, d,  $J = 0.9$  Hz), 2.72 (3H, s), 1.26 (3H, s), 1.10 (3H, s), 0.93 (3H, s).

**<sup>13</sup>C NMR** (150 MHz,  $\text{CD}_2\text{Cl}_2$ ): 182.8, 150.5, 132.8, 128.2, 124.2, 117.9, 107.0, 84.4, 54.2, 45.5, 32.3, 23.3, 21.7, 21.2.

**IR** (film,  $\text{cm}^{-1}$ ): 3422, 2970, 2919, 2869, 2824, 2359, 1694, 1487, 1288, 1024, 740.

**MELTING POINT**: 147.2–148.0°C

**HRMS (ESI) calcd. for  $\text{C}_{14}\text{H}_{18}\text{N}_2\text{O}$  ( $m/z$   $\text{M}+\text{H}^+$ ): 231.1497, found: 231.1502.**

#### e. General Procedure E for Protodehalogenation reaction<sup>17</sup>

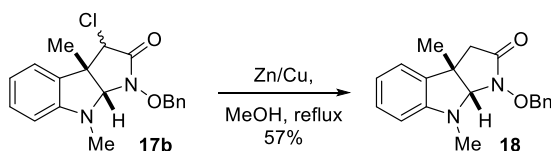

To a round bottom flask containing indoline **17b** (36 mg, 0.105 mmol) in  $\text{MeOH}$  (3 mL),  $\text{Zn}/\text{Cu}$  couple (290 mg, 2.22 mmol) was added. The reaction mixture was stirred at reflux for 7 h. Once the reaction was determined to be complete via thin layer chromatographic analysis, the reaction mixture was filtered and repeatedly washed with  $\text{MeOH}$ . The filtrate was then diluted with water, extracted with  $\text{CH}_2\text{Cl}_2$  (x3), dried over anhydrous sodium sulfate, and concentrated under rotary evaporation. The resulting residue was purified by silica gel chromatography (ethyl acetate/hexanes) to afford **18** (18 mg, 57%).

**<sup>1</sup>H NMR** (600 MHz,  $\text{CD}_2\text{Cl}_2$ ):  $\delta$ , ppm 7.37 (2H, dd,  $J = 2.1, 7.7$  Hz), 7.34–7.28 (3H, m), 7.03 (1H, ddd,  $J = 7.7, 7.7, 1.2$  Hz), 6.93 (1H, dd,  $J = 0.7, 7.3$  Hz), 6.63 (1H, ddd,  $J = 7.5, 7.5, 0.8$  Hz), 6.35 (1H, d,  $J = 8.1$  Hz), 5.02 (1H, d,  $J = 10.8$  Hz), 4.83 (1H, d,  $J = 10.4$  Hz), 4.43 (1H, s), 2.91 (3H, s), 2.57 (1H, d,  $J = 17.3$  Hz), 2.40 (1H, d,  $J = 16.2$  Hz), 1.25 (3H, s).

**<sup>13</sup>C NMR** (150 MHz,  $\text{CD}_2\text{Cl}_2$ ): 168.5, 149.0, 135.2, 135.1, 129.6, 128.8, 128.6, 128.5, 122.1, 118.3, 106.9, 88.0, 76.8, 43.7, 41.4, 33.6, 25.9.

**IR** (film,  $\text{cm}^{-1}$ ): 3430, 3055, 2926, 2097, 1641, 1492, 1265, 736, 702.

**HRMS (ESI) calcd. for  $\text{C}_{19}\text{H}_{20}\text{N}_2\text{O}_2$  ( $m/z$   $\text{M}+\text{H}^+$ ): 309.1603, found: 309.1602.**

<sup>16</sup> Zhao, G.-L.; Lin, S.; Korotvicka, A.; Deiana, L.; Kullberg, M.; Cordova, *Adv. Synth. Cat.* **2010**, *352*, 2291–2298.

<sup>17</sup> Sondengam, B.L.; Fomum, Z.T.; Charles, G.; Akam, T.M. *J. Chem. Soc. Perkin. Trans. I* **1983**, 1219–1221.

## SUPPORTING INFORMATION

### DFT Calculation Details.

Full-molecule calculations were carried out using the hybrid B3LYP-D3 functional<sup>1</sup> with the zero-damping, two-body only D3 correction of Grimme et al.,<sup>2</sup> and the 6-311++G\*\* basis,<sup>3</sup> as implemented in the Jaguar<sup>4</sup> suite of programs. All computations were carried out using the Poisson-Boltzmann solver<sup>5</sup> implemented as part of the Jaguar suite, and using an implicit trifluoroethanol solvent model with settings: dielectric constant 26.7; molecular weight 100.04 g/mol; density 1.39 g/mL; probe radius 2.43Å. Computed structures were confirmed as stationary points by calculating the vibrational frequencies using second derivative analytic methods, and confirming the absence of imaginary frequencies for minima, and the presence of a single imaginary frequency for transition states. Thermodynamic quantities were calculated assuming an ideal gas, and are zero point energy corrected. Graphical representations of structures were made using the CYLView program.<sup>6</sup>

### Material Relevant to all DFT output

Jaguar version 7.9, release 23  
Copyright Schrodinger, LLC  
All Rights Reserved.  
Jaguar, version 7.9, Schrodinger, LLC, New York, NY, 2011

Non-default options chosen:

SCF calculation type: DFT(b3lyp-d3)  
DFT=Becke\_3\_Parameter/HF+Slater+Becke88+VWN+LYP (B3LYP)  
Solvation energy will be computed using PBF  
Vibrational frequencies and related properties computed from analytic second derivatives  
Molecular symmetry not used  
Energy convergence criterion: 1.00E-05 hartrees  
RMS density matrix convergence criterion: 1.00E-06  
Highest accuracy cutoffs used in SCF

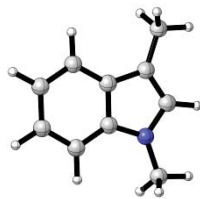

15

|   |          |          |          |
|---|----------|----------|----------|
| C | -1.21670 | 1.69910  | 0.13790  |
| C | -2.53040 | 1.80950  | 0.62520  |
| C | -3.51440 | 0.97370  | 0.10650  |
| C | -3.21000 | 0.02440  | -0.89320 |
| C | -1.91850 | -0.10720 | -1.39650 |
| C | -0.93170 | 0.73840  | -0.87530 |
| C | 0.01670  | 2.37840  | 0.43800  |
| C | 0.96840  | 1.82040  | -0.38110 |
| N | 0.40780  | 0.83620  | -1.18200 |
| H | -2.77420 | 2.53540  | 1.39570  |
| H | -4.53320 | 1.04850  | 0.47420  |
| H | -3.99850 | -0.61580 | -1.27650 |
| H | -1.69010 | -0.84040 | -2.16340 |
| H | 2.02290  | 2.05200  | -0.46630 |
| C | 1.11780  | -0.00470 | -2.13190 |
| H | 2.12960  | 0.37940  | -2.26470 |
| H | 1.17570  | -1.03880 | -1.77610 |
| H | 0.61310  | 0.00650  | -3.10200 |
| C | 0.20650  | 3.47820  | 1.43980  |
| H | 1.24810  | 3.80820  | 1.47430  |
| H | -0.41240 | 4.35080  | 1.20140  |
| H | -0.07510 | 3.15600  | 2.44880  |

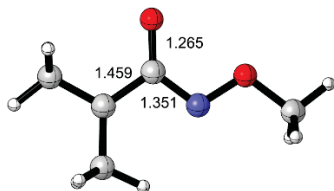

9-Me

|   |          |         |          |
|---|----------|---------|----------|
| C | -0.21990 | 5.03400 | -1.17580 |
| N | 1.93660  | 4.35980 | -1.52140 |
| C | -1.33320 | 5.96150 | -1.44060 |
| H | -1.03140 | 6.97200 | -1.12600 |
| H | -2.25440 | 5.67380 | -0.93440 |
| C | 1.03420  | 5.30320 | -1.87030 |
| O | 1.19040  | 6.27700 | -2.66290 |
| C | -0.45900 | 3.92310 | -0.22950 |
| H | -0.80280 | 4.34720 | 0.72700  |
| H | -1.31130 | 3.32970 | -0.59640 |
| H | 0.40400  | 3.28460 | -0.07100 |
| H | -1.49260 | 6.04670 | -2.52380 |
| O | 3.11850  | 4.56150 | -2.14240 |
| C | 4.08110  | 3.54840 | -1.76150 |
| H | 4.99850  | 3.80770 | -2.28920 |
| H | 4.24200  | 3.57150 | -0.68100 |
| H | 3.72830  | 2.56170 | -2.07130 |

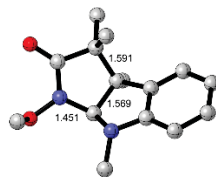

12

|   |          |          |          |
|---|----------|----------|----------|
| C | -1.34150 | 2.06290  | -0.21100 |
| C | -2.60710 | 2.08320  | 0.35320  |
| C | -3.52110 | 1.07030  | 0.02570  |
| C | -3.14600 | 0.05140  | -0.85260 |
| C | -1.86780 | 0.01820  | -1.42340 |
| C | -0.97330 | 1.04150  | -1.10050 |
| C | -0.18230 | 3.01860  | -0.02200 |
| C | 0.96650  | 2.27680  | -0.79190 |
| N | 0.33190  | 1.21720  | -1.57790 |
| H | -2.89170 | 2.86840  | 1.04740  |
| H | -4.51490 | 1.07370  | 0.46110  |
| H | -3.85360 | -0.73600 | -1.09580 |
| H | -1.59010 | -0.78380 | -2.09860 |
| H | 1.73190  | 1.85910  | -0.12540 |
| C | 1.13600  | 0.04690  | -1.92210 |
| H | 2.12870  | 0.36880  | -2.23830 |
| H | 1.24590  | -0.64010 | -1.07000 |
| H | 0.67810  | -0.49500 | -2.75200 |
| C | 0.19200  | 3.18540  | 1.45750  |
| H | 1.10330  | 3.77930  | 1.57480  |
| H | -0.61020 | 3.67160  | 2.01650  |
| H | 0.36510  | 2.20260  | 1.90290  |
| C | -0.33510 | 4.40250  | -0.79090 |
| N | 1.57400  | 3.33390  | -1.57950 |
| C | -1.37960 | 4.33220  | -1.93050 |
| H | -2.38670 | 4.26270  | -1.51490 |
| H | -1.21560 | 3.46570  | -2.57410 |
| C | 1.02300  | 4.56960  | -1.48530 |
| O | 1.49960  | 5.60020  | -1.95260 |
| C | -0.65280 | 5.60870  | 0.09930  |
| H | -0.70640 | 6.50860  | -0.51790 |
| H | -1.62250 | 5.47510  | 0.58740  |
| H | 0.10340  | 5.77650  | 0.86780  |
| H | -1.31960 | 5.23640  | -2.54090 |
| O | 2.81200  | 3.12530  | -2.16920 |
| C | 2.69040  | 3.01010  | -3.61120 |
| H | 3.70420  | 2.81460  | -3.96490 |
| H | 2.03020  | 2.18100  | -3.87240 |
| H | 2.31520  | 3.94460  | -4.03610 |

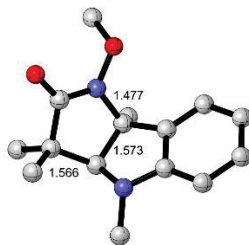

21

|   |          |         |         |
|---|----------|---------|---------|
| C | -0.34610 | 1.89330 | 0.37610 |
| C | -0.19900 | 1.75280 | 1.74710 |

|   |          |          |          |
|---|----------|----------|----------|
| C | -1.22140 | 1.13310  | 2.48080  |
| C | -2.35800 | 0.65530  | 1.82140  |
| C | -2.51190 | 0.79150  | 0.43750  |
| C | -1.49650 | 1.43410  | -0.28150 |
| C | 0.61000  | 2.47570  | -0.64550 |
| C | -0.13020 | 2.23190  | -2.01140 |
| N | -1.45680 | 1.70770  | -1.64400 |
| H | 0.69660  | 2.10750  | 2.24690  |
| H | -1.12540 | 1.01390  | 3.55470  |
| H | -3.14020 | 0.16260  | 2.39150  |
| H | -3.39940 | 0.40910  | -0.05390 |
| H | 0.40710  | 1.48810  | -2.61130 |
| C | -2.12250 | 0.80880  | -2.57980 |
| H | -2.03390 | 1.19720  | -3.59340 |
| H | -1.68920 | -0.20240 | -2.55420 |
| H | -3.18650 | 0.73990  | -2.34550 |
| C | 2.01710  | 1.88080  | -0.55800 |
| H | 2.66650  | 2.28380  | -1.33900 |
| H | 2.46400  | 2.09280  | 0.41670  |
| H | 1.96150  | 0.79590  | -0.67310 |
| C | -0.15620 | 3.61040  | -2.75390 |
| N | 0.64420  | 3.95100  | -0.59590 |
| C | 1.02460  | 3.69790  | -3.74550 |
| H | 0.88590  | 2.96400  | -4.54480 |
| H | 1.98080  | 3.49160  | -3.25760 |
| C | 0.10630  | 4.62860  | -1.63550 |
| O | -0.06260 | 5.84630  | -1.68600 |
| C | -1.46800 | 3.93900  | -3.47180 |
| H | -1.44070 | 4.97680  | -3.81250 |
| H | -1.60230 | 3.29990  | -4.34870 |
| H | -2.32520 | 3.81020  | -2.80890 |
| H | 1.07770  | 4.69340  | -4.19360 |
| O | 0.98120  | 4.58250  | 0.58950  |
| C | 2.28370  | 5.21370  | 0.50530  |
| H | 2.43890  | 5.67300  | 1.48300  |
| H | 3.06080  | 4.47090  | 0.31180  |
| H | 2.28380  | 5.97940  | -0.27290 |

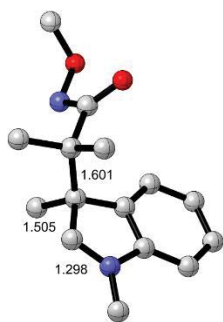

19a

|   |          |          |          |
|---|----------|----------|----------|
| C | -1.38840 | 2.09190  | 0.00020  |
| C | -2.59420 | 2.53220  | 0.53030  |
| C | -3.67740 | 1.64530  | 0.54340  |
| C | -3.55930 | 0.34150  | 0.04600  |
| C | -2.34740 | -0.12090 | -0.47710 |
| C | -1.29540 | 0.78400  | -0.47890 |
| C | -0.03540 | 2.76830  | -0.14800 |
| C | 0.75500  | 1.65400  | -0.77870 |
| N | 0.04850  | 0.57630  | -0.93490 |
| H | -2.69470 | 3.53640  | 0.92270  |

|   |          |          |          |
|---|----------|----------|----------|
| H | -4.62870 | 1.97640  | 0.94790  |
| H | -4.41770 | -0.32180 | 0.06930  |
| H | -2.24620 | -1.13220 | -0.85590 |
| H | 1.80640  | 1.67460  | -1.05080 |
| C | 0.52190  | -0.70660 | -1.47470 |
| H | 1.56190  | -0.60180 | -1.78040 |
| H | 0.42990  | -1.47040 | -0.69860 |
| H | -0.09910 | -0.97480 | -2.33220 |
| C | 0.60830  | 3.01420  | 1.24850  |
| H | 1.66690  | 3.26480  | 1.16000  |
| H | 0.08110  | 3.84460  | 1.71580  |
| H | 0.51480  | 2.11800  | 1.86720  |
| C | -0.07230 | 4.05200  | -1.10380 |
| N | -0.93390 | 5.59190  | 0.55220  |
| C | 1.30330  | 4.74870  | -1.12410 |
| H | 2.09760  | 4.06860  | -1.45200 |
| H | 1.56290  | 5.15480  | -0.14830 |
| C | -1.18060 | 5.08920  | -0.64770 |
| O | -2.12960 | 5.35460  | -1.43770 |
| C | -0.40560 | 3.58290  | -2.53300 |
| H | -0.50790 | 4.44360  | -3.19380 |
| H | 0.39540  | 2.94930  | -2.92930 |
| H | -1.34510 | 3.02910  | -2.56760 |
| H | 1.27020  | 5.58220  | -1.83120 |
| O | -1.96420 | 6.55400  | 0.93710  |
| C | -1.55630 | 7.85800  | 0.53080  |
| H | -2.30170 | 8.56190  | 0.91170  |
| H | -0.57320 | 8.11250  | 0.95010  |
| H | -1.50750 | 7.93520  | -0.56180 |

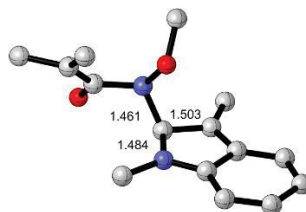

19b

|   |          |          |          |
|---|----------|----------|----------|
| C | -1.04910 | 1.55350  | 0.13530  |
| C | -2.31180 | 1.32590  | 0.77080  |
| C | -3.27120 | 0.63000  | 0.09190  |
| C | -3.01830 | 0.12830  | -1.22980 |
| C | -1.82470 | 0.31760  | -1.88480 |
| C | -0.81430 | 1.04930  | -1.20940 |
| C | 0.07940  | 2.21260  | 0.55070  |
| C | 1.09350  | 2.16970  | -0.55790 |
| N | 0.41260  | 1.37720  | -1.61220 |
| H | -2.49300 | 1.70630  | 1.77040  |
| H | -4.23910 | 0.44260  | 0.54380  |
| H | -3.80830 | -0.42540 | -1.72840 |
| H | -1.66970 | -0.07780 | -2.88150 |
| H | 2.01940  | 1.65710  | -0.25920 |
| C | 1.07330  | 0.98030  | -2.84750 |
| H | 1.80560  | 0.19010  | -2.65240 |
| H | 0.33880  | 0.62020  | -3.56990 |
| H | 1.59710  | 1.84090  | -3.26800 |
| C | 0.35350  | 2.90500  | 1.82850  |

|   |          |         |          |
|---|----------|---------|----------|
| H | 0.88800  | 3.84030 | 1.63760  |
| H | -0.55580 | 3.10650 | 2.39620  |
| H | 1.01970  | 2.29300 | 2.45060  |
| C | 2.77650  | 4.16690 | -3.00410 |
| N | 1.50400  | 3.51100 | -0.96610 |
| C | 1.60770  | 4.52060 | -3.89910 |
| H | 1.31750  | 5.58030 | -3.82220 |
| H | 0.71190  | 3.93470 | -3.71180 |
| C | 2.74590  | 3.60420 | -1.74720 |
| O | 3.74410  | 3.15020 | -1.06370 |
| C | 4.11730  | 4.50390 | -3.60510 |
| H | 4.31070  | 3.91140 | -4.51230 |
| H | 4.15280  | 5.55820 | -3.91830 |
| H | 4.93590  | 4.32800 | -2.90620 |
| H | 1.89480  | 4.36050 | -4.94580 |
| O | 0.34330  | 4.17830 | -1.47180 |
| C | 0.27400  | 5.51180 | -0.96130 |
| H | -0.62020 | 5.94840 | -1.41200 |
| H | 0.17710  | 5.52000 | 0.12690  |
| H | 1.15280  | 6.08720 | -1.26110 |

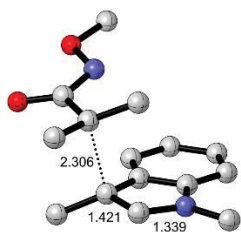

TS1‡

|   |          |          |          |
|---|----------|----------|----------|
| C | -1.33760 | 2.15840  | 0.19360  |
| C | -2.40640 | 2.88020  | 0.72600  |
| C | -3.69380 | 2.35800  | 0.59390  |
| C | -3.92380 | 1.14000  | -0.06690 |
| C | -2.86980 | 0.40380  | -0.61140 |
| C | -1.59230 | 0.93450  | -0.45980 |
| C | 0.09960  | 2.41010  | 0.11670  |
| C | 0.62230  | 1.24920  | -0.51370 |
| N | -0.35550 | 0.41060  | -0.88040 |
| H | -2.24270 | 3.82600  | 1.23000  |
| H | -4.53660 | 2.90140  | 1.00870  |
| H | -4.93750 | 0.76200  | -0.15420 |
| H | -3.04560 | -0.53790 | -1.12060 |
| H | 1.65970  | 1.00140  | -0.70380 |
| C | -0.19620 | -0.85970 | -1.58790 |
| H | 0.86190  | -1.03040 | -1.78390 |
| H | -0.58460 | -1.67200 | -0.96820 |
| H | -0.74430 | -0.83480 | -2.53280 |
| C | 0.88010  | 3.18150  | 1.15270  |
| H | 1.95230  | 3.12130  | 0.95370  |
| H | 0.58600  | 4.23050  | 1.18410  |
| H | 0.70060  | 2.74280  | 2.14020  |
| C | 0.24580  | 3.81670  | -1.70500 |
| N | -1.80780 | 4.89160  | -1.55690 |
| C | 1.72560  | 4.04220  | -1.76740 |
| H | 2.28880  | 3.11700  | -1.89590 |
| H | 2.08560  | 4.60790  | -0.91060 |
| C | -0.54420 | 4.98140  | -1.16950 |

|   |          |         |          |
|---|----------|---------|----------|
| O | 0.01490  | 5.89790 | -0.47980 |
| C | -0.32960 | 2.97690 | -2.81160 |
| H | -0.43120 | 3.61620 | -3.69680 |
| H | 0.33350  | 2.14920 | -3.07100 |
| H | -1.32490 | 2.60360 | -2.57820 |
| H | 1.90520  | 4.66650 | -2.65670 |
| O | -2.55390 | 6.00320 | -1.11590 |
| C | -3.92310 | 5.78510 | -1.46760 |
| H | -4.46790 | 6.67470 | -1.14720 |
| H | -4.03660 | 5.65390 | -2.54890 |
| H | -4.31580 | 4.90020 | -0.95740 |

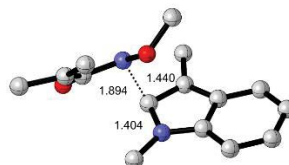

TS1A‡

|   |          |         |          |
|---|----------|---------|----------|
| C | -0.83040 | 1.90760 | 0.09670  |
| C | -2.14460 | 1.84060 | 0.62930  |
| C | -3.14420 | 1.28900 | -0.14240 |
| C | -2.87390 | 0.79710 | -1.45040 |
| C | -1.60600 | 0.84600 | -2.00730 |
| C | -0.57830 | 1.39940 | -1.22630 |
| C | 0.37900  | 2.41130 | 0.59100  |
| C | 1.35000  | 2.27690 | -0.46380 |
| N | 0.74880  | 1.54270 | -1.49920 |
| H | -2.35430 | 2.21870 | 1.62490  |
| H | -4.15650 | 1.22590 | 0.24320  |
| H | -3.68930 | 0.37250 | -2.02780 |
| H | -1.42160 | 0.47280 | -3.00870 |
| H | 2.41440  | 2.13040 | -0.29670 |
| C | 1.40610  | 1.19080 | -2.74940 |
| H | 2.47730  | 1.09310 | -2.57450 |
| H | 1.02290  | 0.23440 | -3.11000 |
| H | 1.23920  | 1.95630 | -3.51200 |
| C | 0.65700  | 3.09360 | 1.88140  |
| H | 1.07790  | 4.08770 | 1.68640  |
| H | -0.24430 | 3.20630 | 2.48670  |
| H | 1.40180  | 2.54690 | 2.47070  |
| C | 2.75860  | 4.45850 | -3.22590 |
| N | 1.57430  | 4.05220 | -1.08480 |
| C | 1.60670  | 4.97530 | -4.04790 |
| H | 1.05950  | 5.77630 | -3.54220 |
| H | 0.86210  | 4.20490 | -4.27090 |
| C | 2.74540  | 3.99710 | -1.89780 |
| O | 3.78240  | 3.58220 | -1.26220 |
| C | 4.09420  | 4.56430 | -3.89980 |
| H | 4.04160  | 4.11920 | -4.90250 |
| H | 4.37250  | 5.61810 | -4.05360 |
| H | 4.88430  | 4.07750 | -3.33120 |
| H | 1.98040  | 5.36740 | -4.99780 |
| O | 0.41640  | 4.34740 | -1.77940 |
| C | -0.44370 | 5.20300 | -1.00500 |
| H | -1.33880 | 5.34060 | -1.61320 |
| H | -0.71270 | 4.73390 | -0.05740 |
| H | 0.04210  | 6.16550 | -0.82190 |

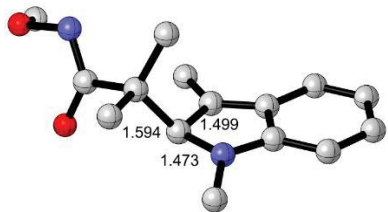

20a

|   |          |         |          |
|---|----------|---------|----------|
| C | -0.16960 | 1.50310 | 0.28670  |
| C | -0.21570 | 1.27460 | 1.69920  |
| C | -1.38950 | 0.84270 | 2.24940  |
| C | -2.54890 | 0.62000 | 1.43080  |
| C | -2.55650 | 0.82790 | 0.07230  |
| C | -1.35170 | 1.28840 | -0.51940 |
| C | 0.85040  | 1.88890 | -0.55460 |
| C | 0.30110  | 2.00870 | -1.94460 |
| N | -1.09070 | 1.54830 | -1.80230 |
| H | 0.66300  | 1.44480 | 2.31250  |
| H | -1.46320 | 0.66010 | 3.31600  |
| H | -3.45850 | 0.27470 | 1.91430  |
| H | -3.45170 | 0.66150 | -0.51600 |
| H | 0.83980  | 1.34450 | -2.63380 |
| C | -1.96710 | 1.13920 | -2.90410 |
| H | -1.38210 | 1.04680 | -3.81720 |
| H | -2.40190 | 0.16300 | -2.67470 |
| H | -2.77150 | 1.86300 | -3.06060 |
| C | 2.25490  | 2.18470 | -0.19390 |
| H | 2.47390  | 3.24600 | -0.36540 |
| H | 2.46330  | 1.94800 | 0.84970  |
| H | 2.93730  | 1.62320 | -0.84050 |
| C | 0.44750  | 3.48550 | -2.52620 |
| N | 2.44040  | 4.83530 | -2.55570 |
| C | -0.34840 | 3.64880 | -3.83800 |
| H | -1.42530 | 3.63150 | -3.66280 |
| H | -0.08730 | 2.88230 | -4.56860 |
| C | 1.95120  | 3.66280 | -2.93040 |
| O | 2.49930  | 2.73640 | -3.59430 |
| C | -0.08130 | 4.50330 | -1.50320 |
| H | -0.08940 | 5.50300 | -1.93800 |
| H | -1.10820 | 4.24840 | -1.22060 |
| H | 0.52670  | 4.54430 | -0.59910 |
| H | -0.10170 | 4.62340 | -4.26750 |
| O | 3.78960  | 5.03050 | -3.08110 |
| C | 4.74740  | 4.50960 | -2.16140 |
| H | 5.73540  | 4.76210 | -2.55580 |
| H | 4.62990  | 4.96350 | -1.16910 |
| H | 4.65720  | 3.42200 | -2.07270 |

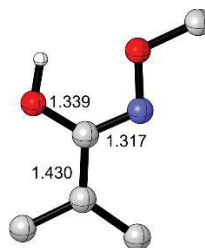

22

|   |          |         |          |
|---|----------|---------|----------|
| C | -0.38120 | 4.89870 | -1.12400 |
| N | 1.22530  | 3.82480 | -2.42850 |
| C | -1.46720 | 4.08270 | -1.69150 |
| H | -1.98990 | 3.58310 | -0.85950 |
| H | -1.14740 | 3.35520 | -2.43170 |
| C | 0.98520  | 4.74580 | -1.51880 |
| O | 1.91190  | 5.52860 | -0.95300 |
| C | -0.70830 | 5.91310 | -0.11020 |
| H | -0.36050 | 6.89990 | -0.45370 |
| H | -1.77380 | 5.94330 | 0.11580  |
| H | -0.12820 | 5.71590 | 0.80470  |
| H | -2.21820 | 4.76650 | -2.11940 |
| O | 2.51610  | 3.76020 | -2.72070 |
| C | 2.82070  | 2.74530 | -3.72710 |
| H | 3.90090  | 2.80730 | -3.85070 |
| H | 2.52000  | 1.76560 | -3.35080 |
| H | 2.30000  | 2.99290 | -4.65410 |
| H | 2.80700  | 5.34080 | -1.29690 |

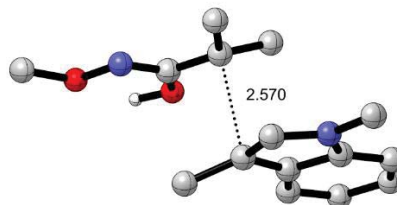

TS1‡(H<sup>+</sup>)

|   |          |          |          |
|---|----------|----------|----------|
| C | -1.68950 | 2.14650  | 0.03940  |
| C | -3.06140 | 2.23390  | 0.30090  |
| C | -3.89480 | 1.22310  | -0.17740 |
| C | -3.37920 | 0.13470  | -0.90340 |
| C | -2.01400 | 0.02430  | -1.17250 |
| C | -1.19500 | 1.04050  | -0.69000 |
| C | -0.55540 | 2.99410  | 0.35870  |
| C | 0.56880  | 2.31510  | -0.16400 |
| N | 0.19850  | 1.18930  | -0.79930 |
| H | -3.47060 | 3.06950  | 0.85900  |
| H | -4.96190 | 1.27270  | 0.01450  |
| H | -4.05460 | -0.63710 | -1.25850 |
| H | -1.61770 | -0.81860 | -1.72880 |
| H | 1.61380  | 2.58490  | -0.07620 |
| C | 1.09100  | 0.21700  | -1.43170 |
| H | 2.10970  | 0.60290  | -1.41200 |
| H | 1.05030  | -0.72770 | -0.88330 |
| H | 0.78780  | 0.04640  | -2.46700 |
| C | -0.49270 | 3.99680  | 1.46870  |
| H | 0.37230  | 4.65570  | 1.36780  |
| H | -1.39970 | 4.60370  | 1.51090  |

|   |          |         |          |
|---|----------|---------|----------|
| H | -0.40550 | 3.47610 | 2.42970  |
| C | -0.52080 | 4.53070 | -1.70050 |
| N | -0.22650 | 6.54630 | -0.52380 |
| C | 0.91630  | 4.59820 | -2.12270 |
| H | 1.24770  | 3.64280 | -2.53060 |
| H | 1.58210  | 4.92280 | -1.32520 |
| C | -1.06520 | 5.64520 | -0.94520 |
| O | -2.39600 | 5.68390 | -0.74850 |
| C | -1.43920 | 3.74580 | -2.56550 |
| H | -1.50600 | 4.28570 | -3.52510 |
| H | -1.02260 | 2.76250 | -2.79640 |
| H | -2.44430 | 3.65010 | -2.16090 |
| H | 0.98360  | 5.34220 | -2.92990 |
| O | -0.88110 | 7.56170 | 0.12750  |
| C | 0.04680  | 8.58760 | 0.54700  |
| H | -0.56370 | 9.33030 | 1.05910  |
| H | 0.79050  | 8.16750 | 1.22830  |
| H | 0.53540  | 9.03170 | -0.32460 |
| H | -2.64540 | 6.49550 | -0.26740 |

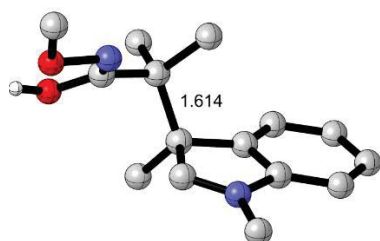

**19a(H<sup>+</sup>)**

|   |          |          |          |
|---|----------|----------|----------|
| C | -1.48710 | 2.05440  | -0.03630 |
| C | -2.75080 | 2.41130  | 0.41720  |
| C | -3.79820 | 1.49310  | 0.26340  |
| C | -3.58910 | 0.23800  | -0.31950 |
| C | -2.31670 | -0.14750 | -0.75260 |
| C | -1.30340 | 0.78500  | -0.58780 |

|   |          |          |          |
|---|----------|----------|----------|
| C | -0.15270 | 2.79050  | -0.05250 |
| C | 0.74000  | 1.72180  | -0.62820 |
| N | 0.08690  | 0.64170  | -0.91650 |
| H | -2.94110 | 3.37280  | 0.88040  |
| H | -4.79350 | 1.76120  | 0.60360  |
| H | -4.42110 | -0.44990 | -0.42890 |
| H | -2.14300 | -1.12500 | -1.18920 |
| H | 1.81480  | 1.78320  | -0.76810 |
| C | 0.65430  | -0.59610 | -1.47350 |
| H | 1.72410  | -0.46080 | -1.62950 |
| H | 0.47460  | -1.41060 | -0.76820 |
| H | 0.15600  | -0.80760 | -2.42220 |
| C | 0.32720  | 3.09690  | 1.39210  |
| H | 1.29620  | 3.59570  | 1.38770  |
| H | -0.40220 | 3.73870  | 1.88920  |
| H | 0.40140  | 2.16970  | 1.96660  |
| C | -0.16070 | 4.07710  | -1.02620 |
| N | 1.67410  | 4.11330  | -2.61990 |
| C | -0.99710 | 3.76620  | -2.28720 |
| H | -2.04930 | 3.66390  | -2.01980 |
| H | -0.67340 | 2.85130  | -2.78610 |
| C | 1.27450  | 4.41490  | -1.43840 |
| O | 2.03700  | 5.01680  | -0.50440 |
| C | -0.77610 | 5.30220  | -0.31950 |
| H | -0.79690 | 6.14110  | -1.02100 |
| H | -1.80500 | 5.09720  | -0.01950 |
| H | -0.20750 | 5.61330  | 0.55500  |
| H | -0.90500 | 4.58350  | -3.00370 |
| O | 3.02640  | 4.49050  | -2.80160 |
| C | 3.31420  | 4.56120  | -4.20640 |
| H | 4.37810  | 4.79040  | -4.27870 |
| H | 3.10310  | 3.60330  | -4.68950 |
| H | 2.72980  | 5.35420  | -4.68300 |
| H | 2.91230  | 5.22100  | -0.88670 |

## References.

- (1) (a) Becke, A. D. *J. Chem. Phys.* **1993**, *98*, 5648-5652; (b) Becke, A. D. *J. Chem. Phys.* **1993**, *98*, 1372-1377; (c) Lee, C.; Yang, W.; Parr, R. G. *Phys. Rev. B* **1988**, *37*, 785-789; (d) Stephens, P. J.; Devlin, F. J.; Chabalowski, C. F.; Frisch, M. J. *J. Phys. Chem.* **1994**, *98*, 11623-11627.
- (2) (a) Grimme, S.; Antony, J.; Ehrlich, S.; Krieg, H. *J. Chem. Phys.* **2010**, *132*, 154104; (b) Goerigk, L.; Grimme, S. *Phys. Chem. Chem. Phys.* **2011**, *13*, 6670-6688.
- (3) (a) Frisch, M. J.; Pople, J. A.; Binkley, J. S. *J. Chem. Phys.* **1984**, *80*, 3265-3269; (b) Clark, T.; Chandrasekhar, J.; Spitznagel, G. W.; Schleyer, P. v. R. *J. Comput. Chem.* **1983**, *4*, 294-301; (c) McLean, A. D.; Chandler, G. S. *J. Chem. Phys.* **1980**, *72*, 5639-5648; (d) Krishnan, R.; Binkley, J. S.; Seeger, R.; Pople, J. A. *J. Chem. Phys.* **1980**, *72*, 650-654.
- (4) *Jaguar, versions 7.0-8.3*, Schrödinger, LLC, New York, NY: 2007-2014.
- (5) (a) Marten, B.; Kim, K.; Cortis, C.; Friesner, R. A.; Murphy, R. B.; Ringnalda, M. N.; Sitkoff, D.; Honig, B. *J. Phys. Chem.* **1996**, *100*, 11775-11788; (b) Tannor, D. J.; Marten, B.; Murphy, R.; Friesner, R. A.; Sitkoff, D.; Nicholls, A.; Honig, B.; Ringnalda, M.; Goddard, W. A. *J. Am. Chem. Soc.* **1994**, *116*, 11875-11882.
- (6) Legault, C. Y. *CYLview, 1.0b*, Université de Sherbrooke: Université de Sherbrooke, 2009.



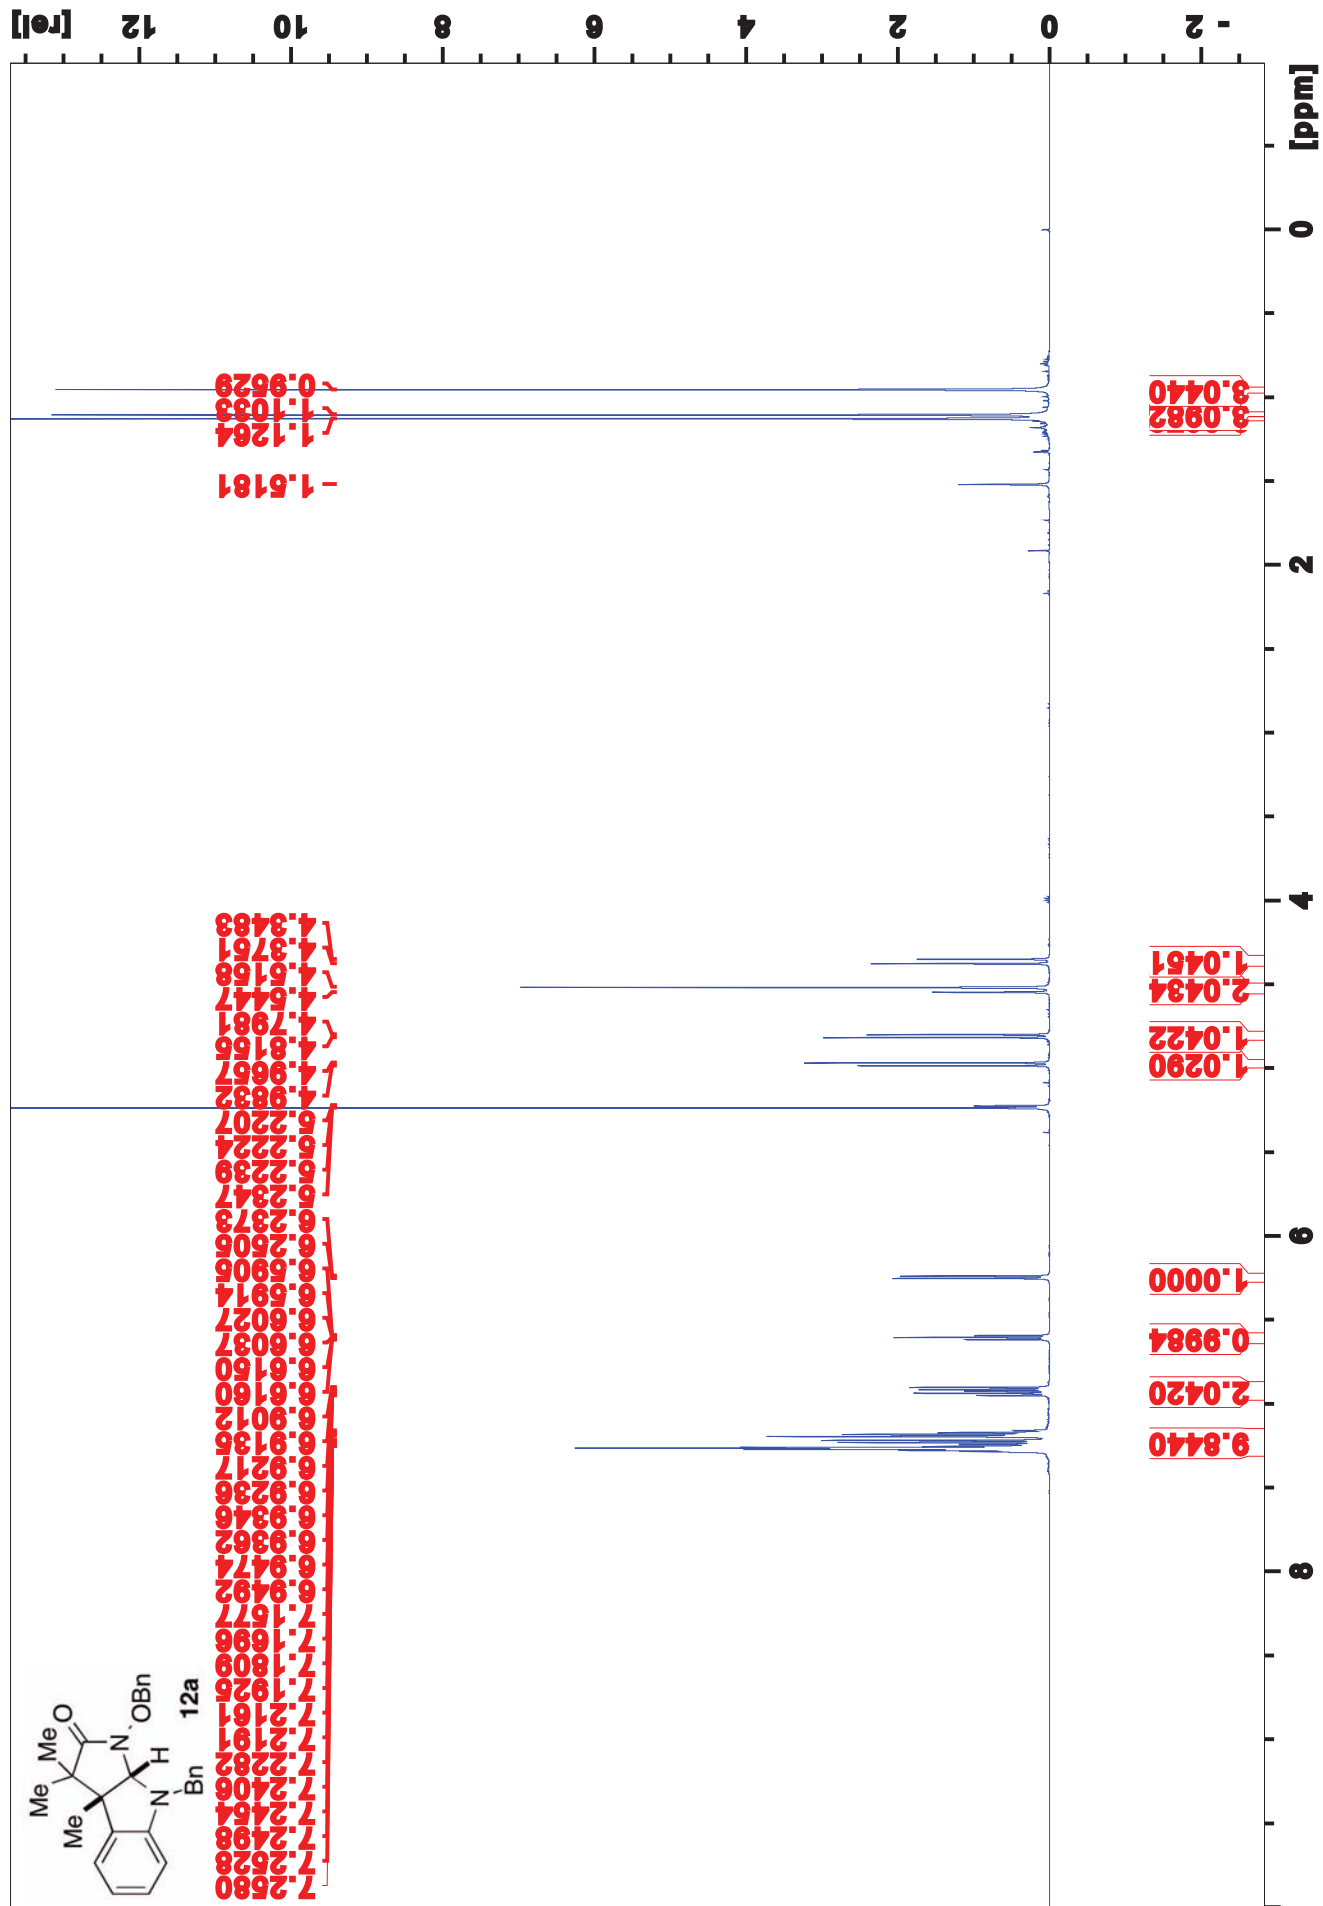

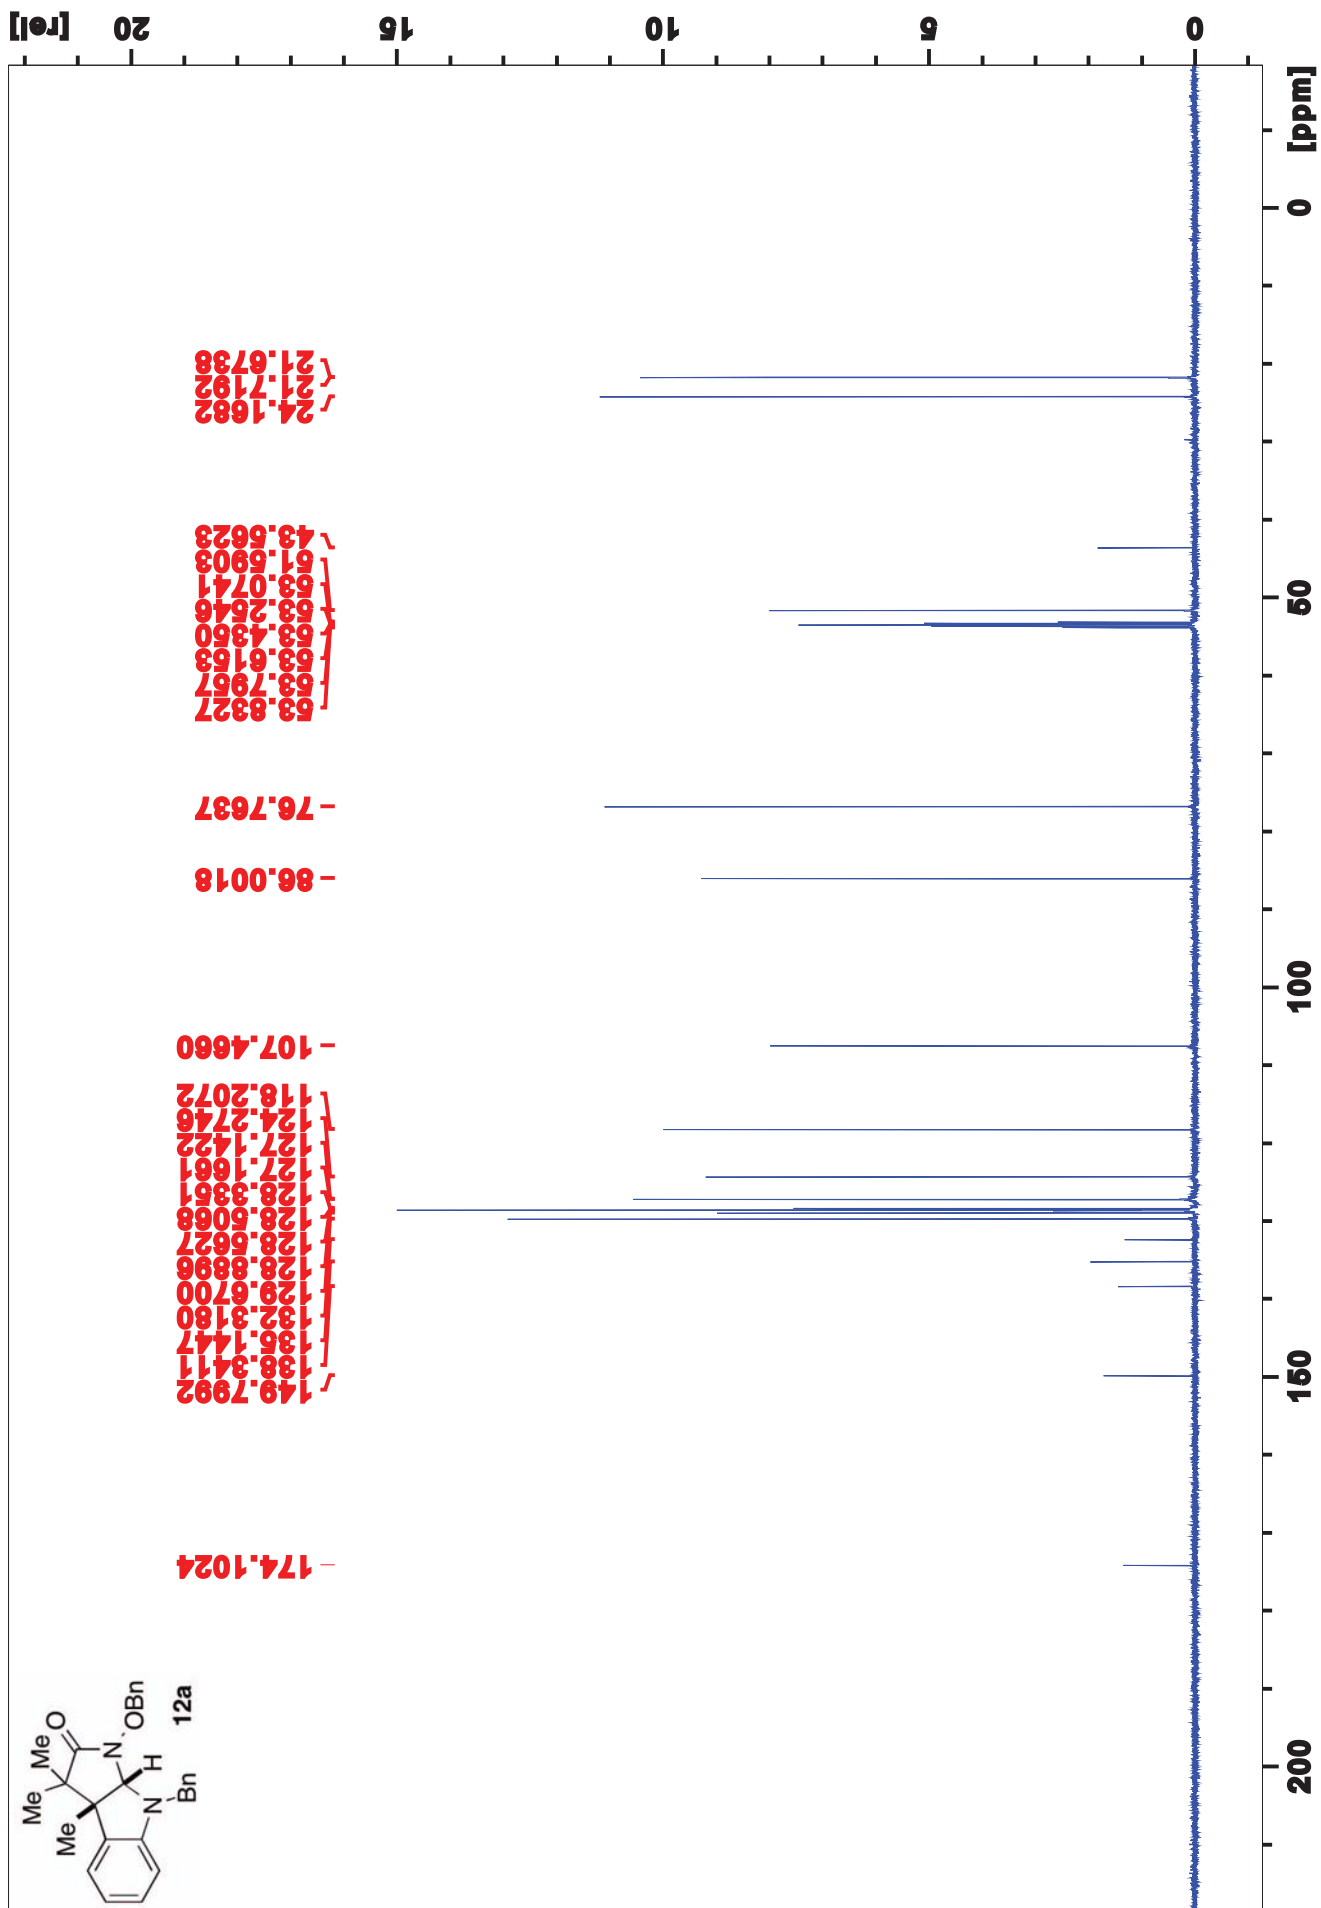



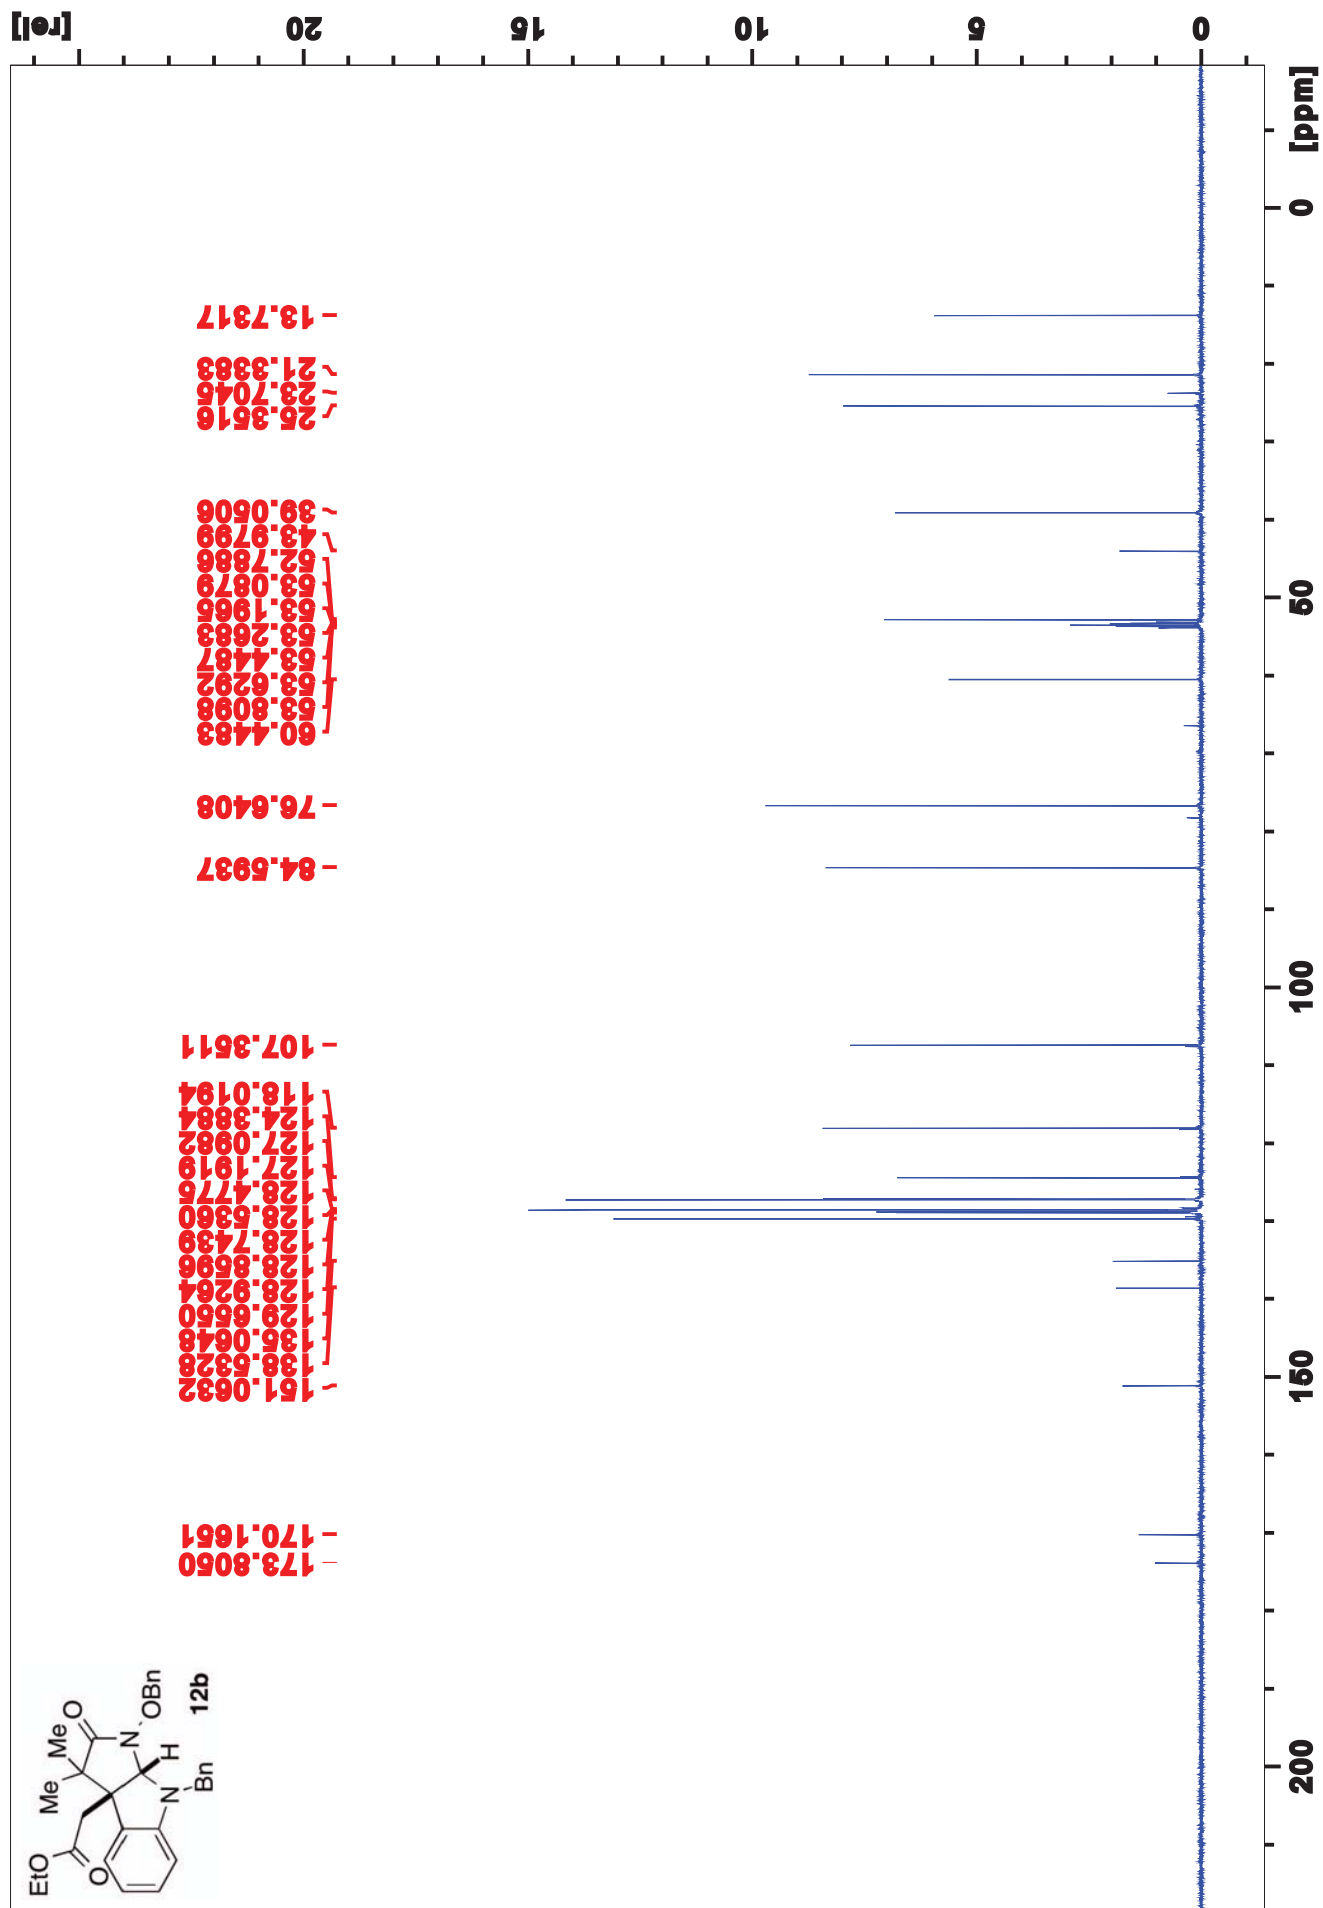



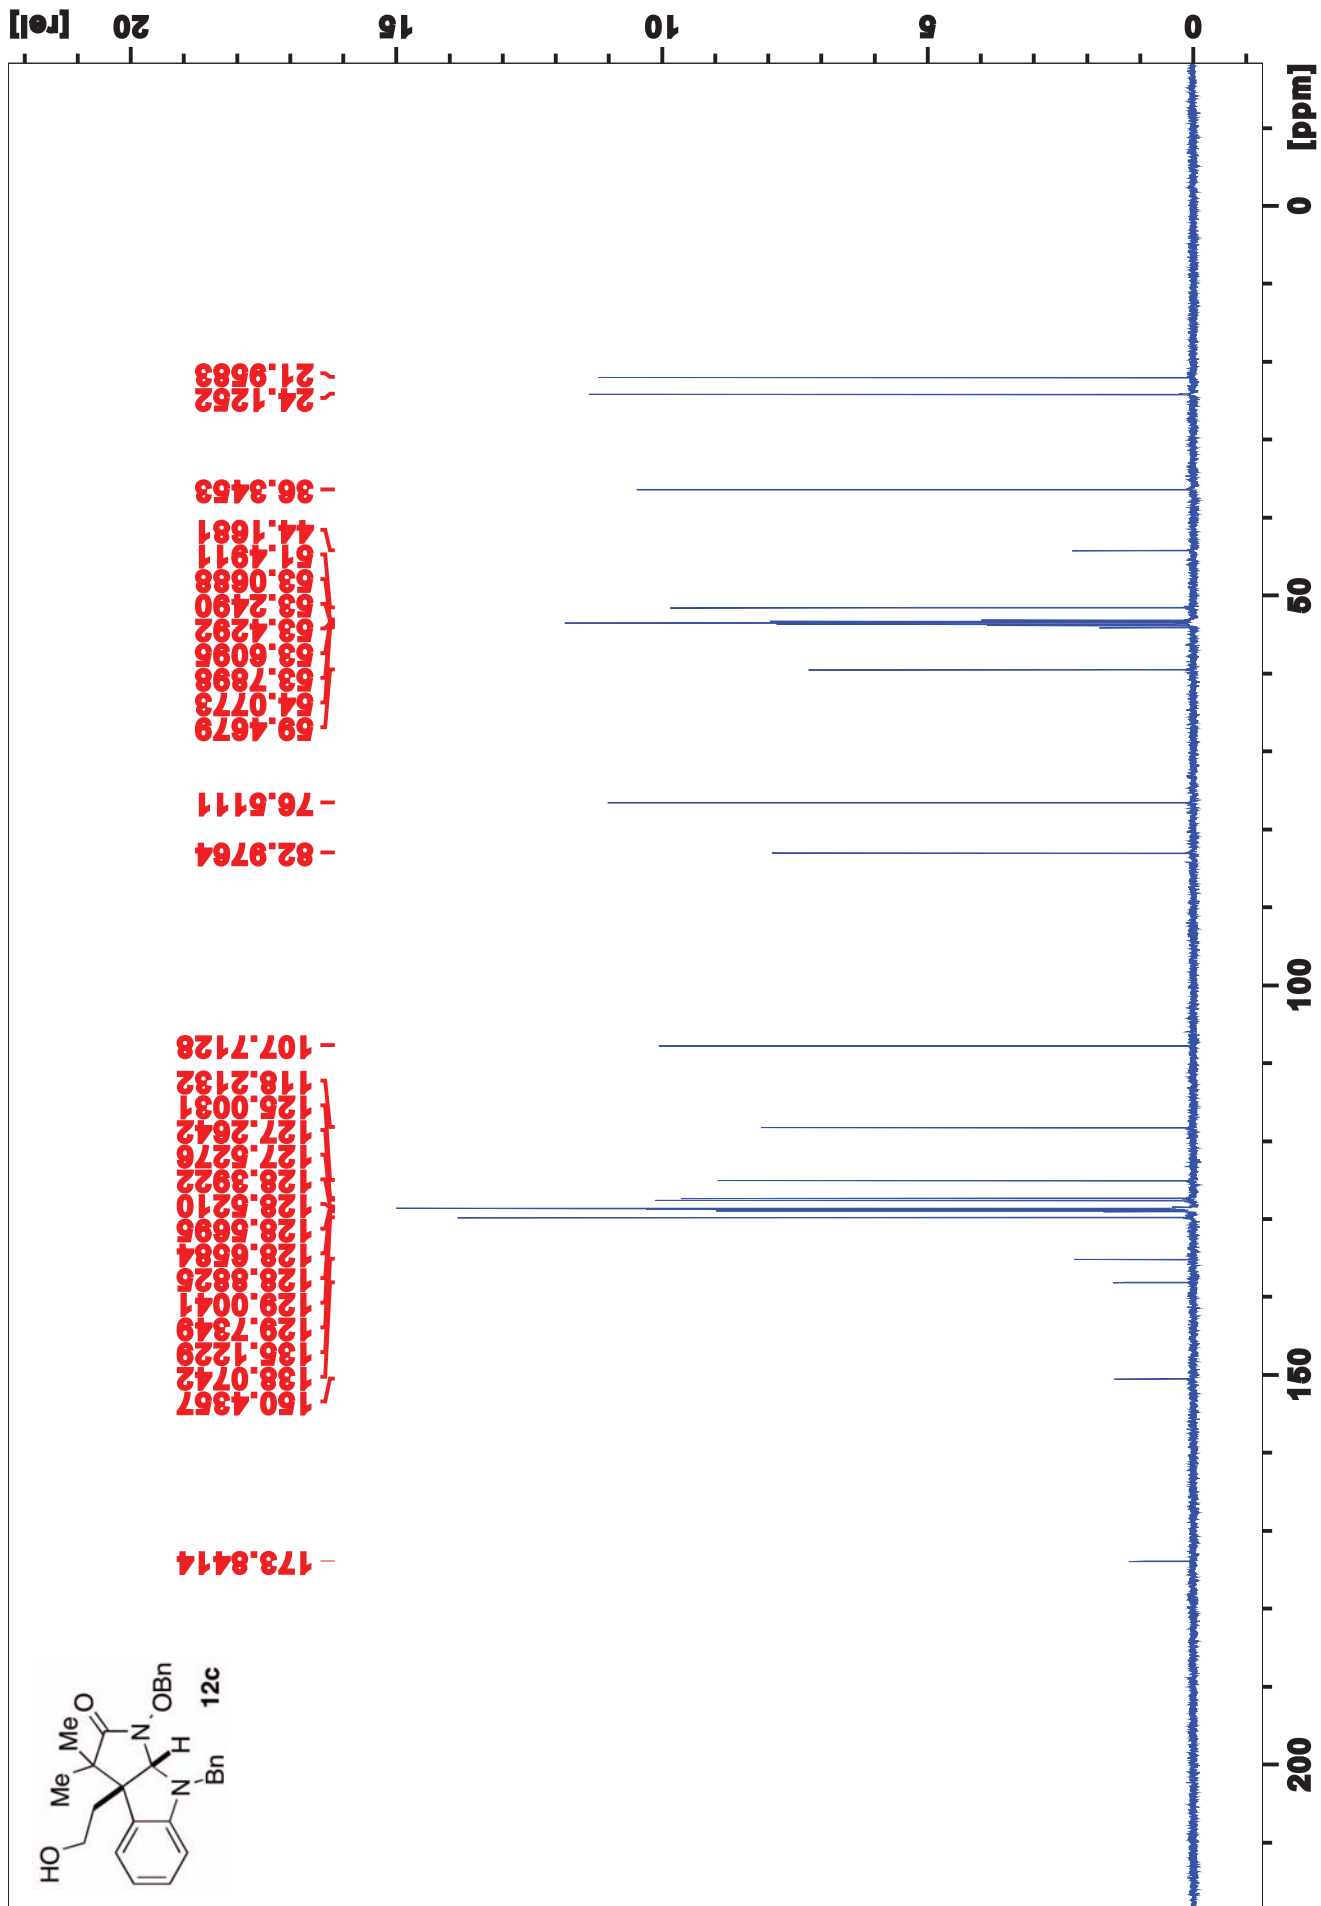

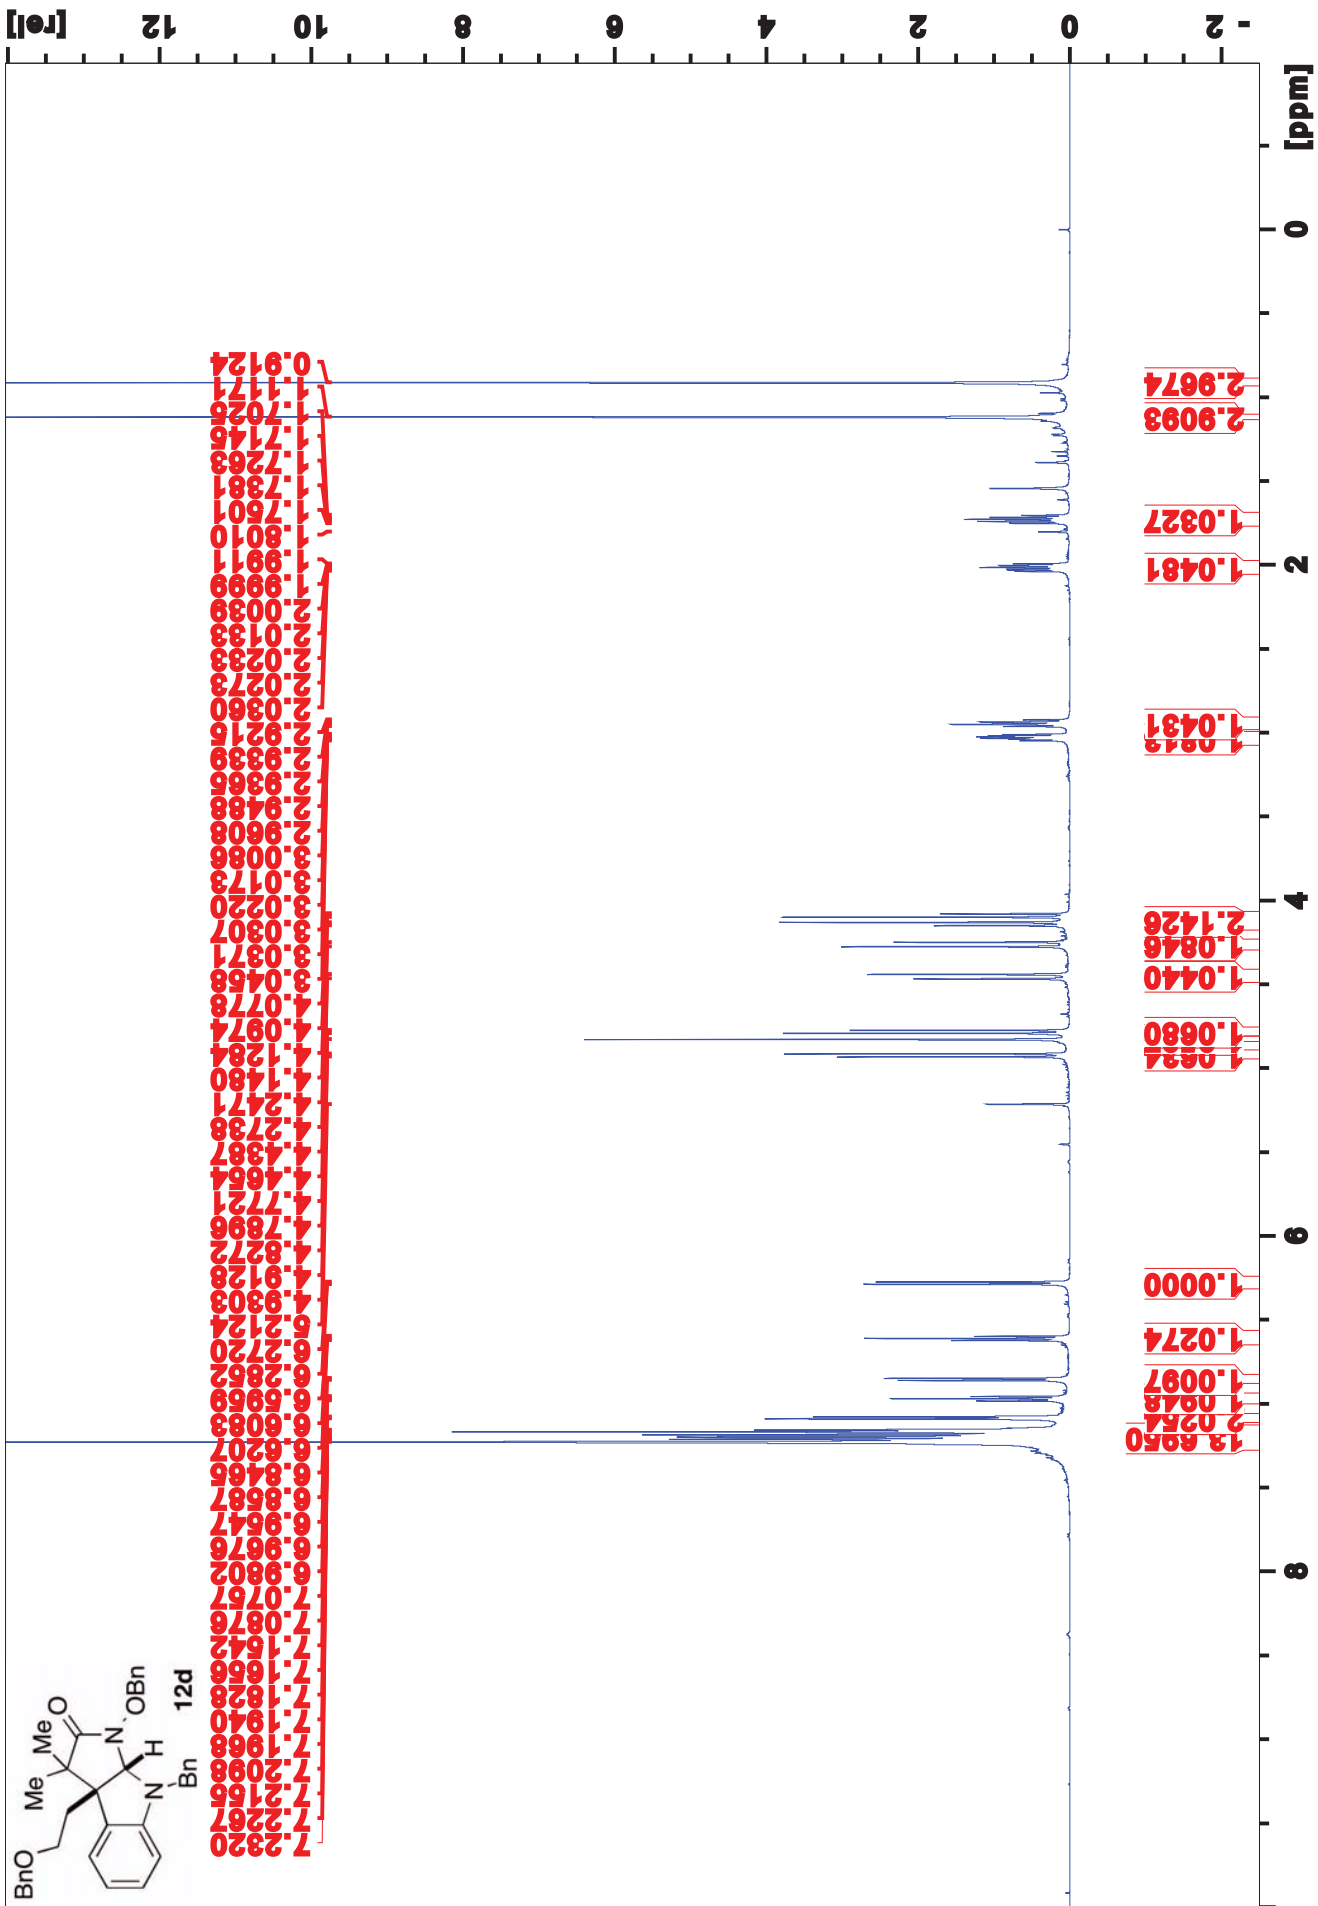

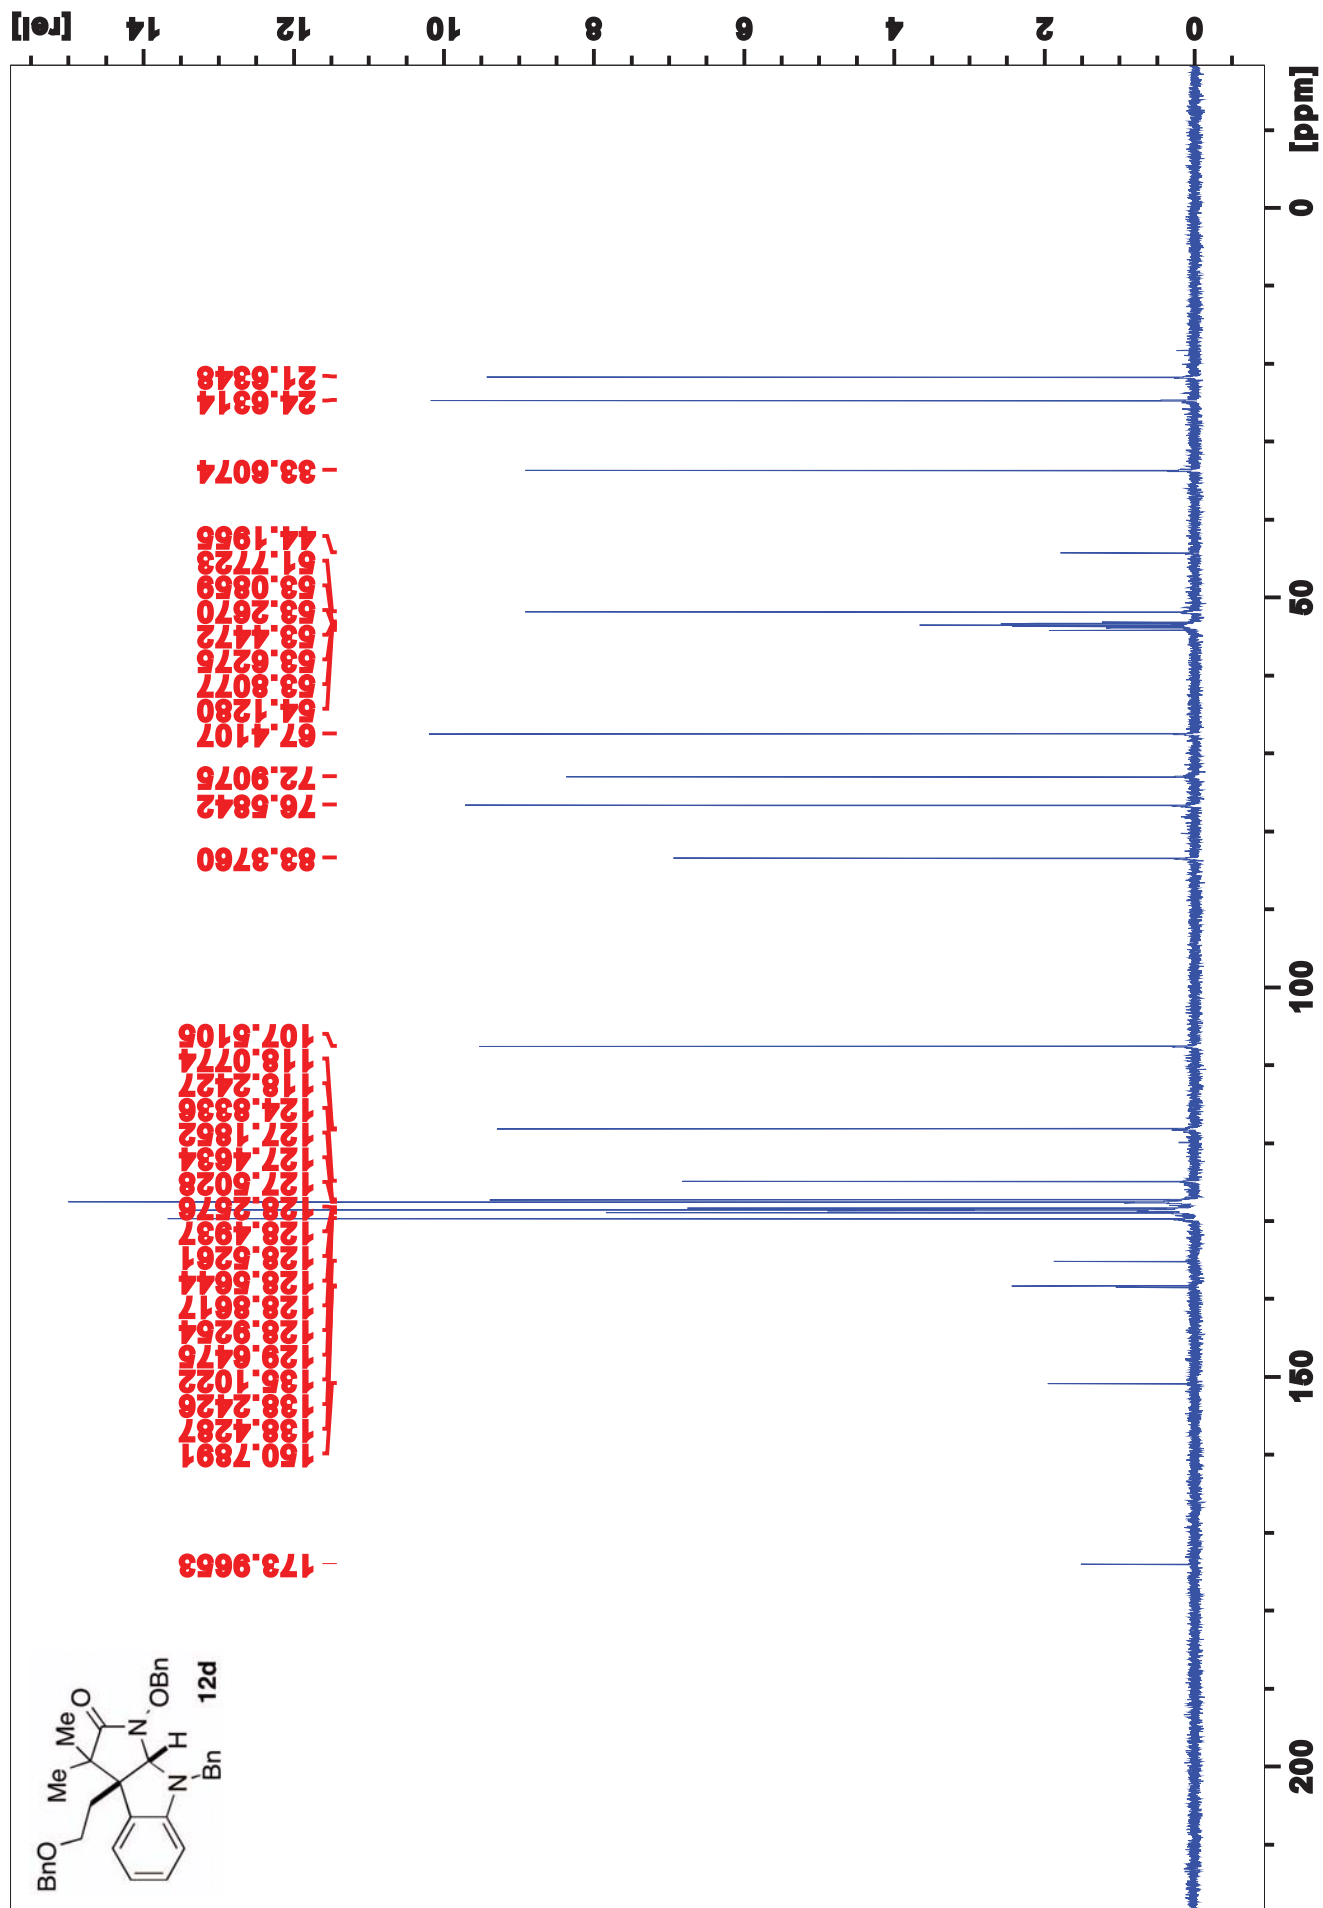



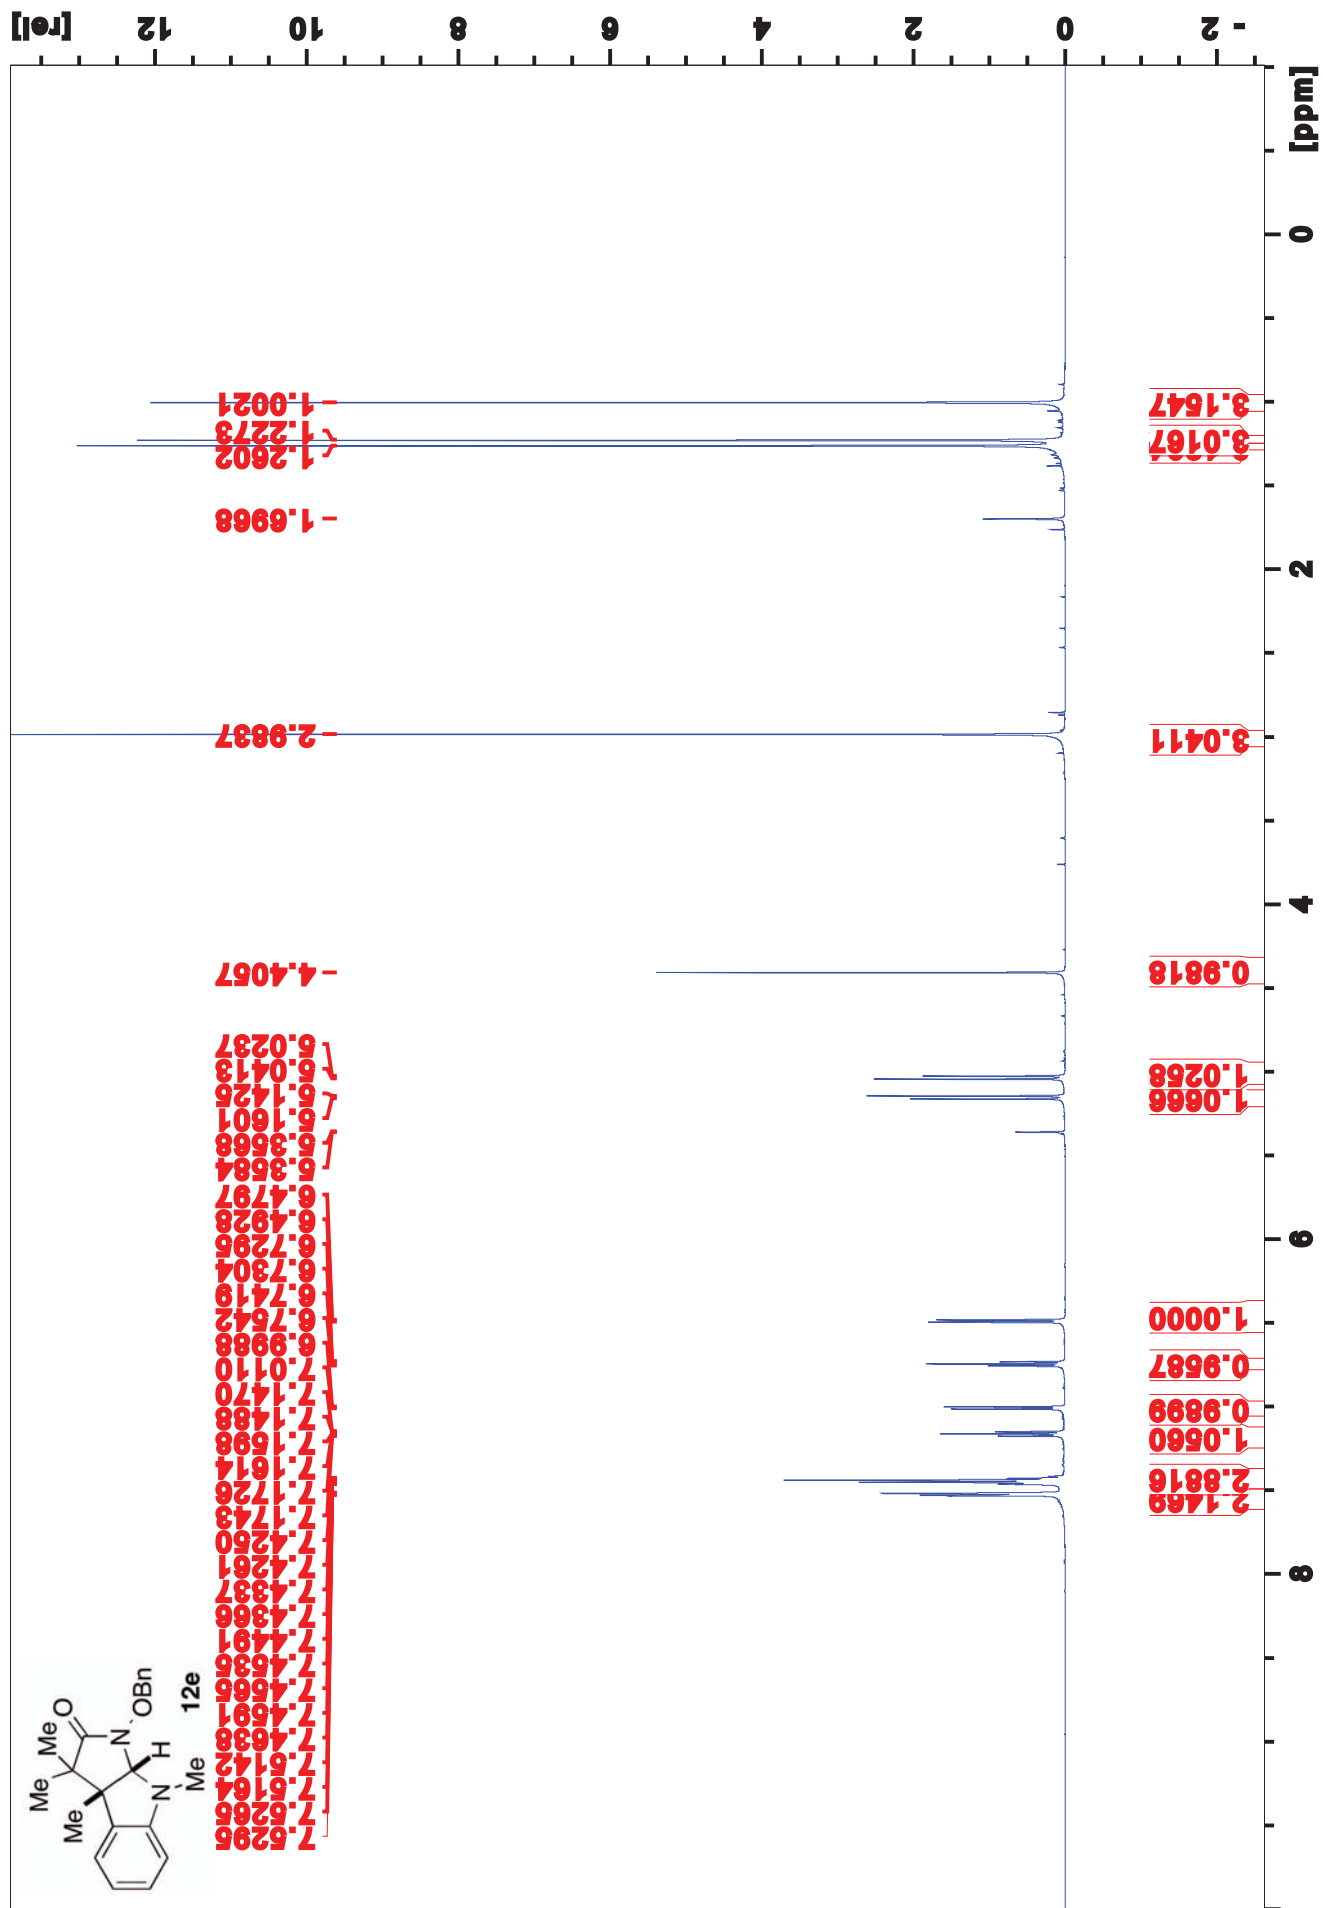

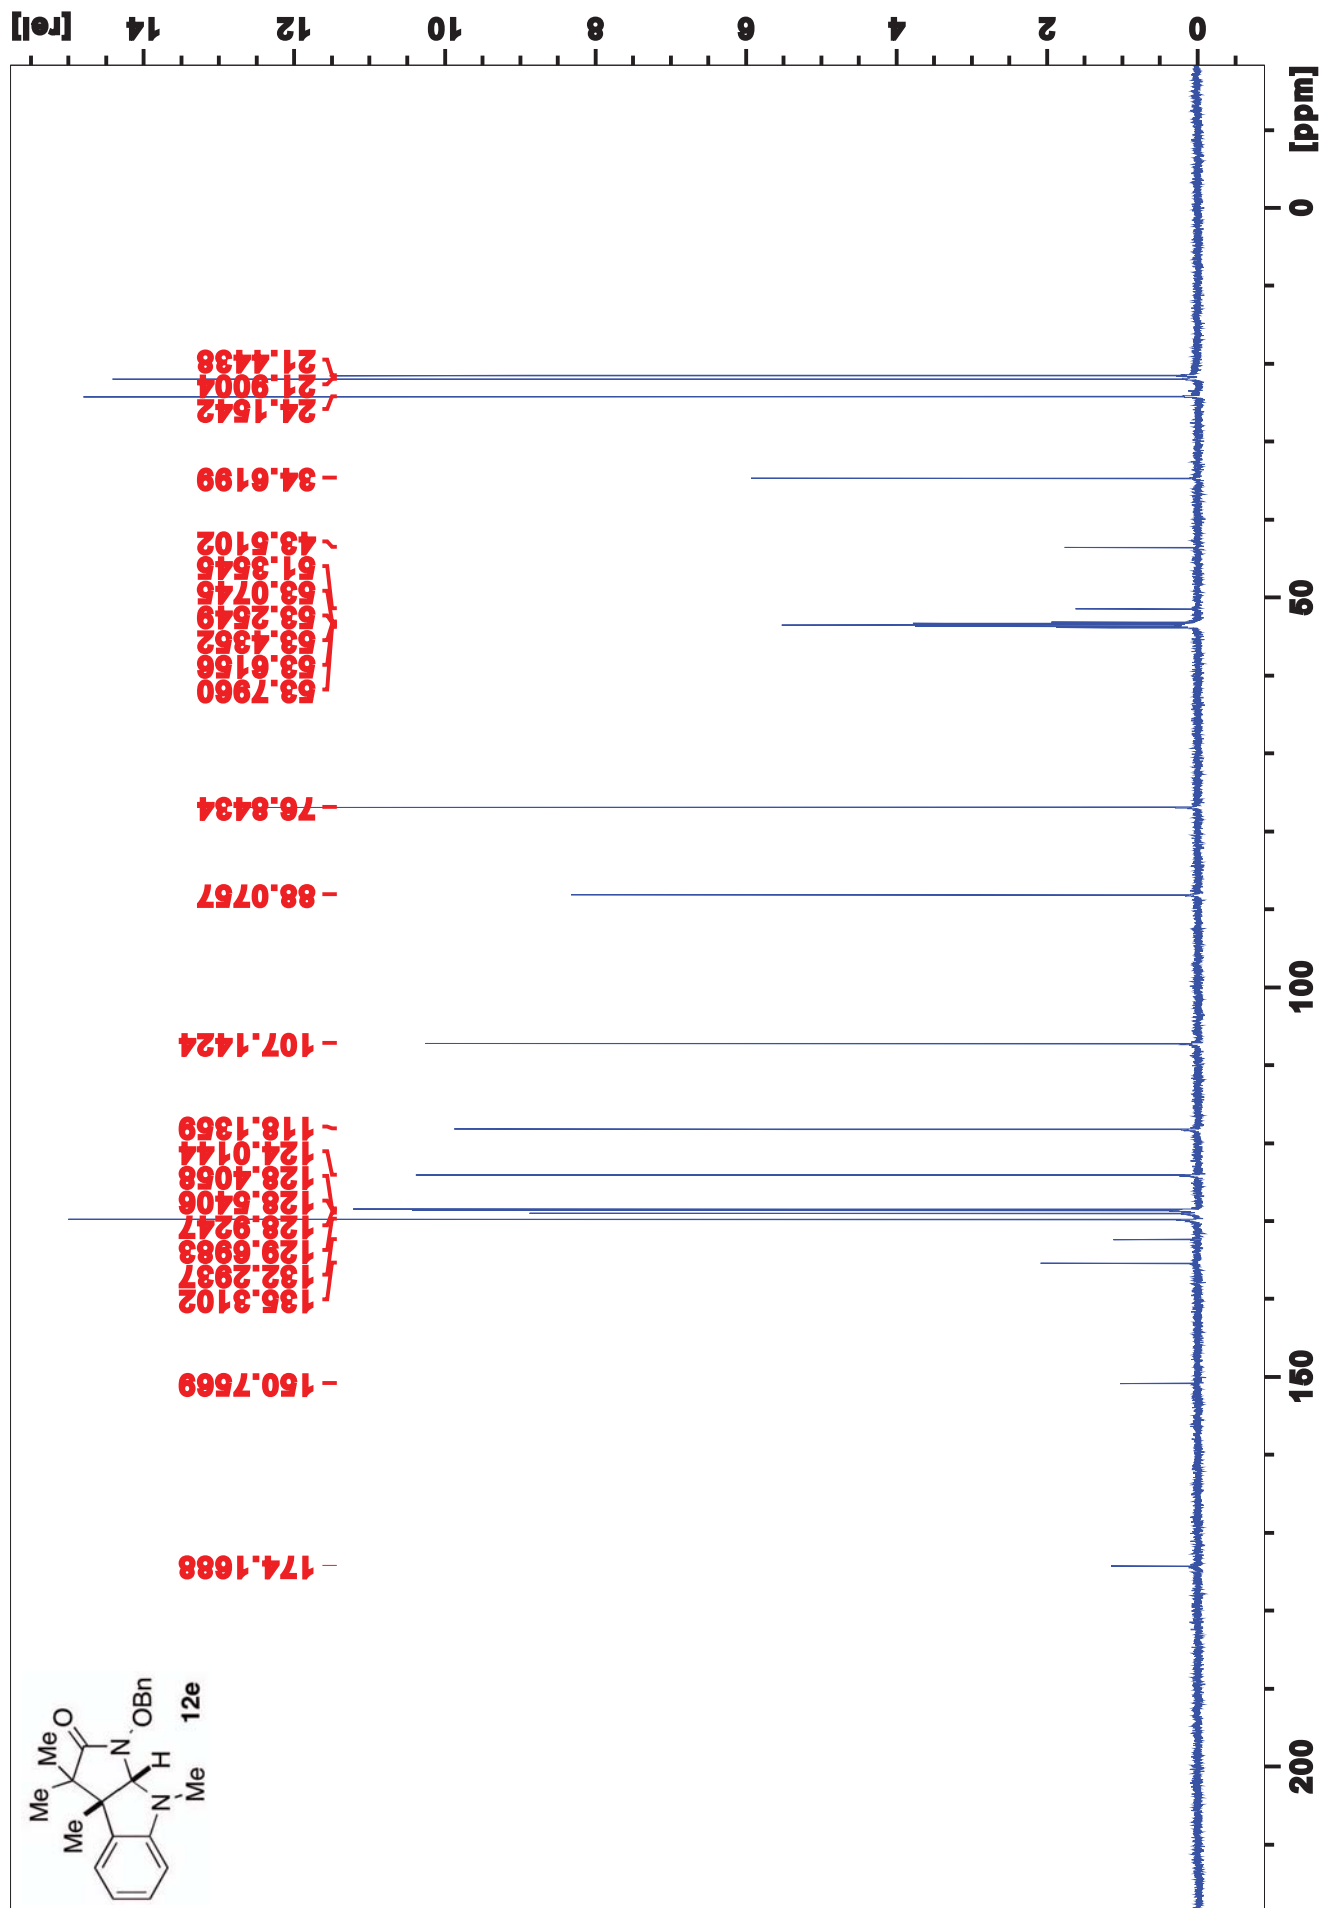

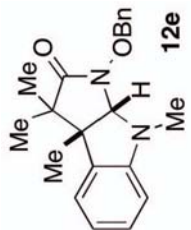

HMQC

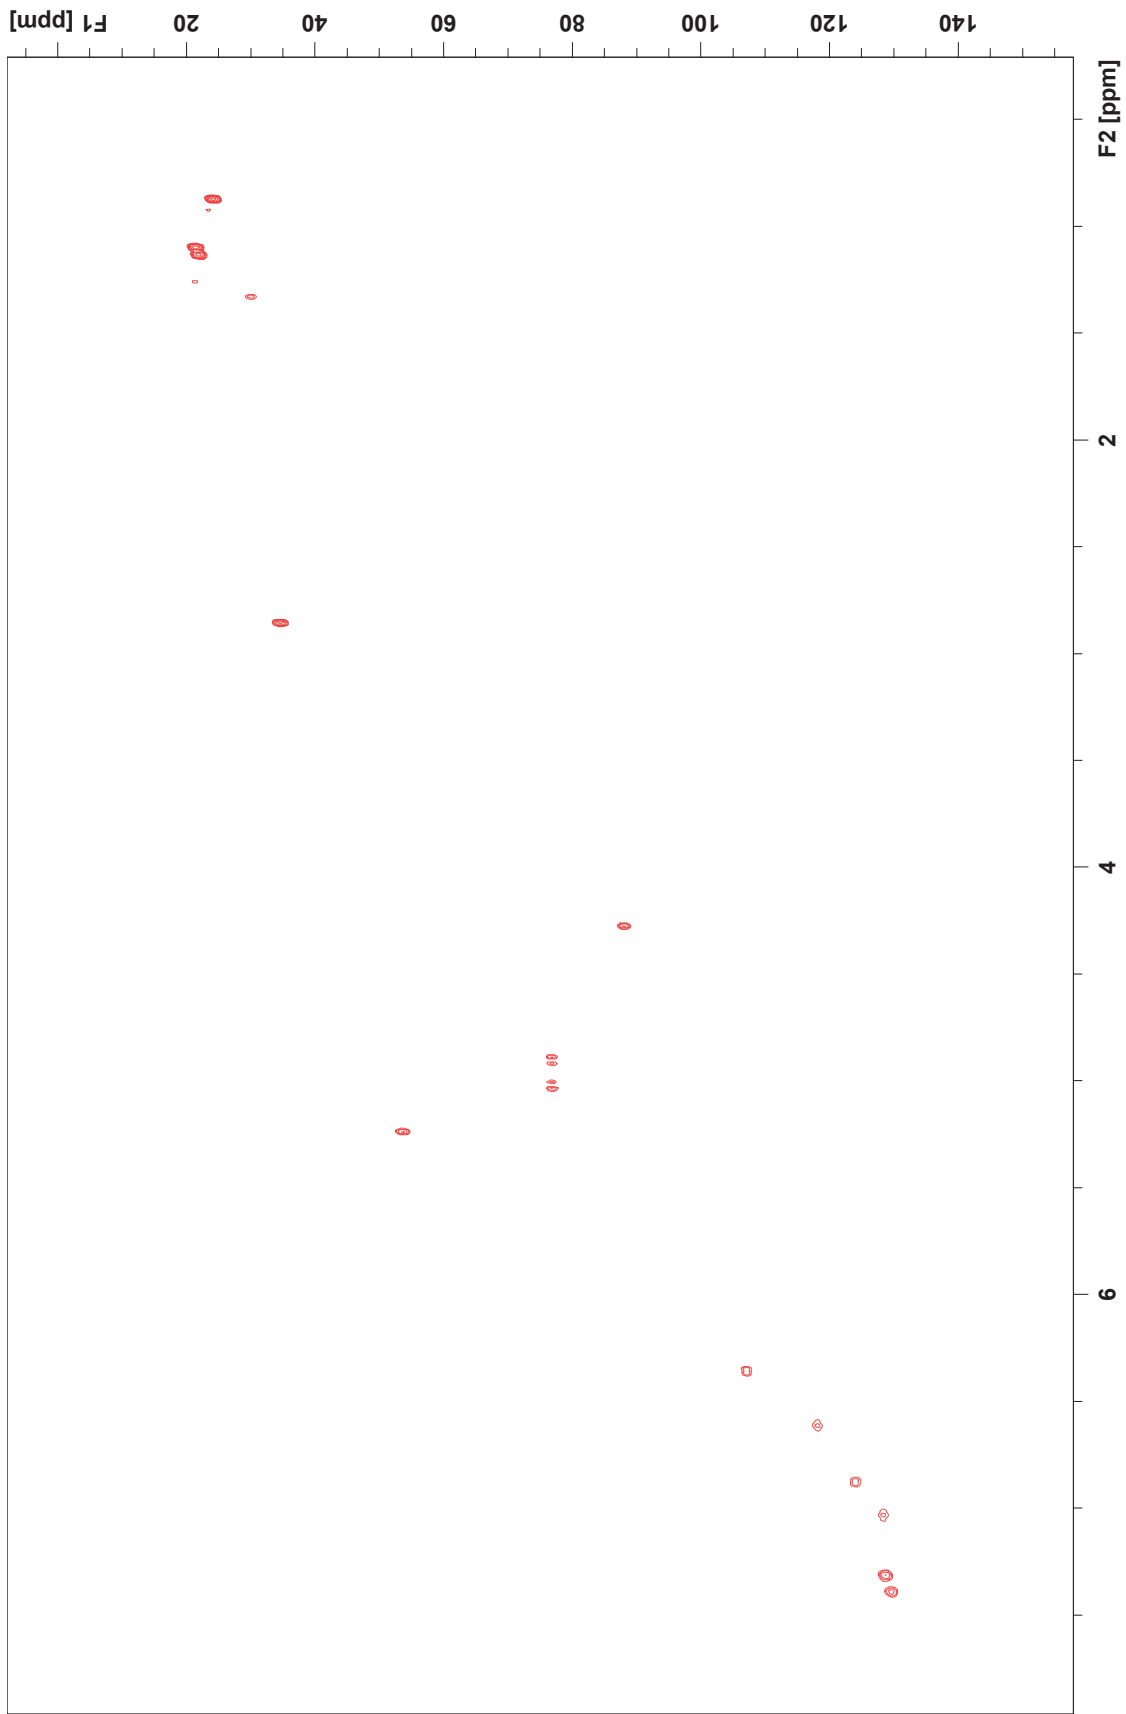



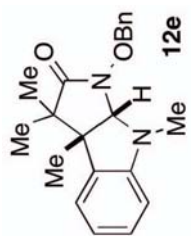

COSY

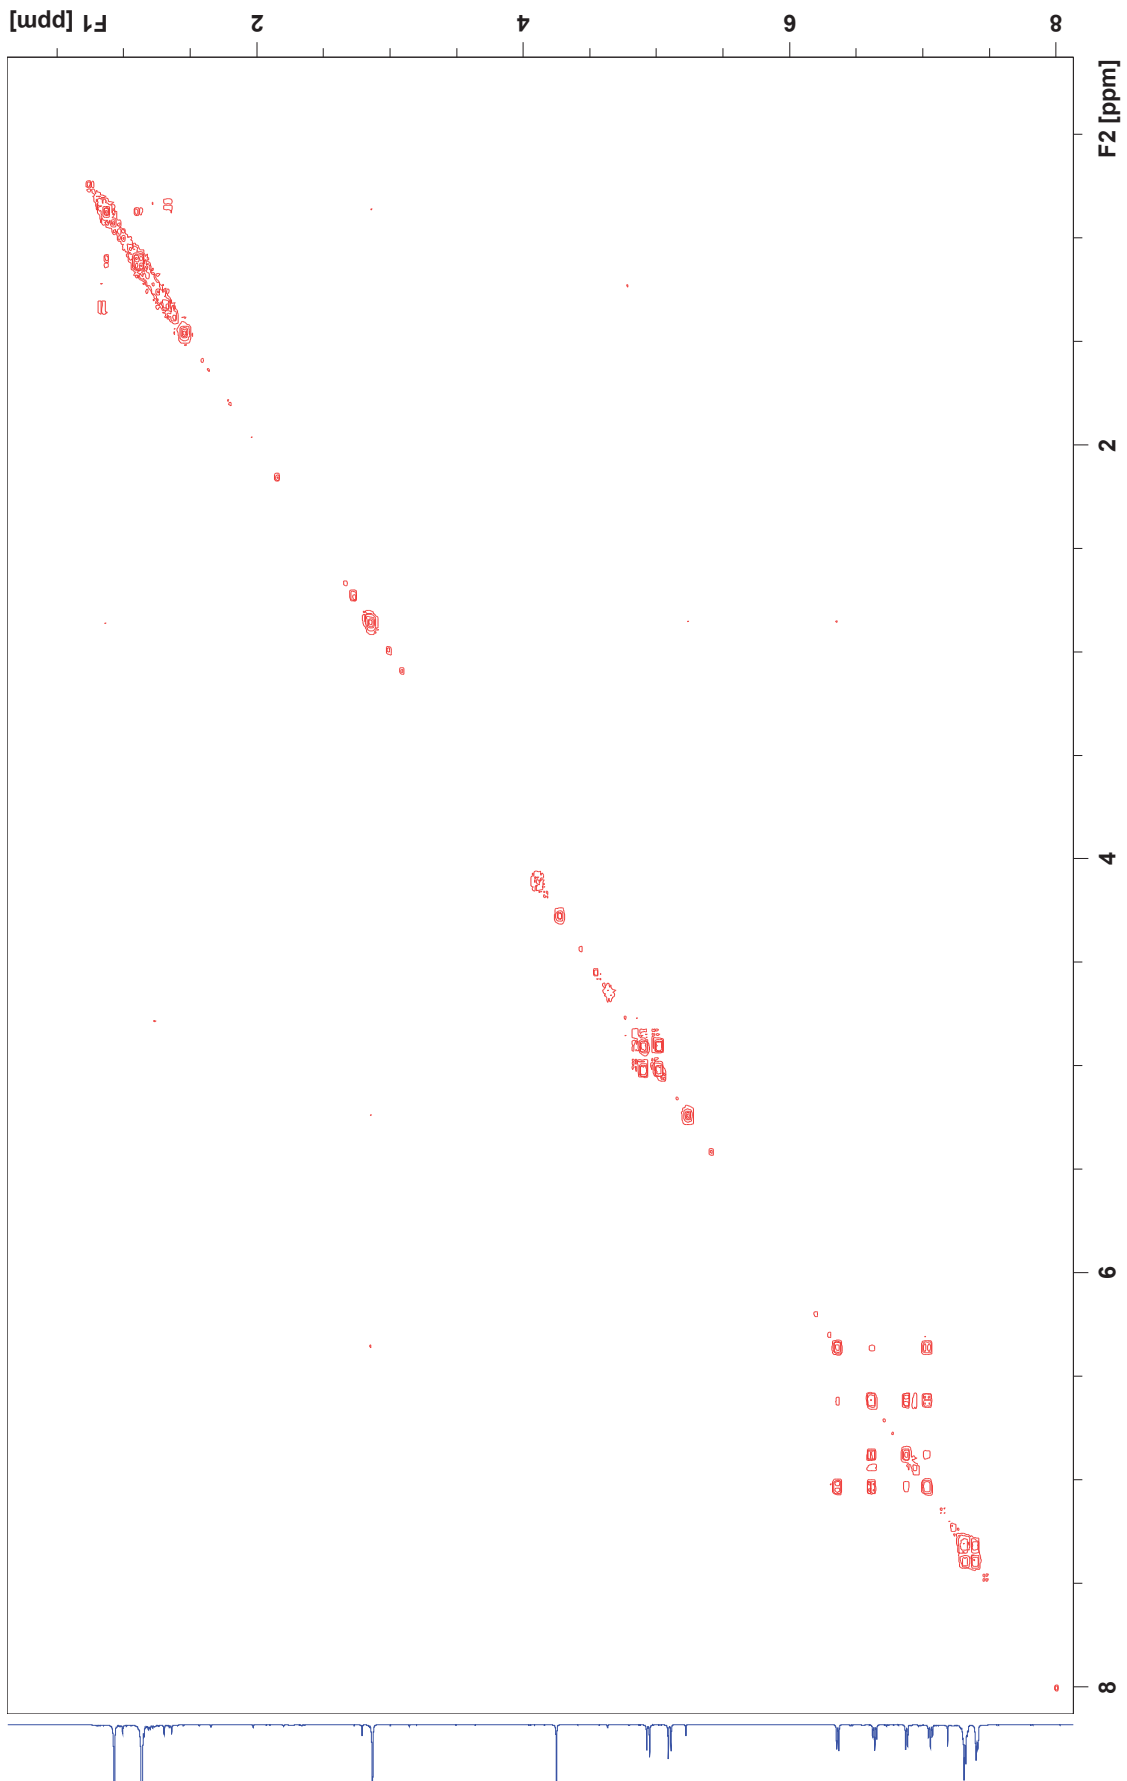

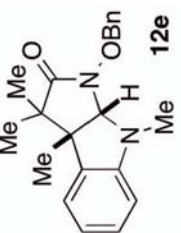

NOESY

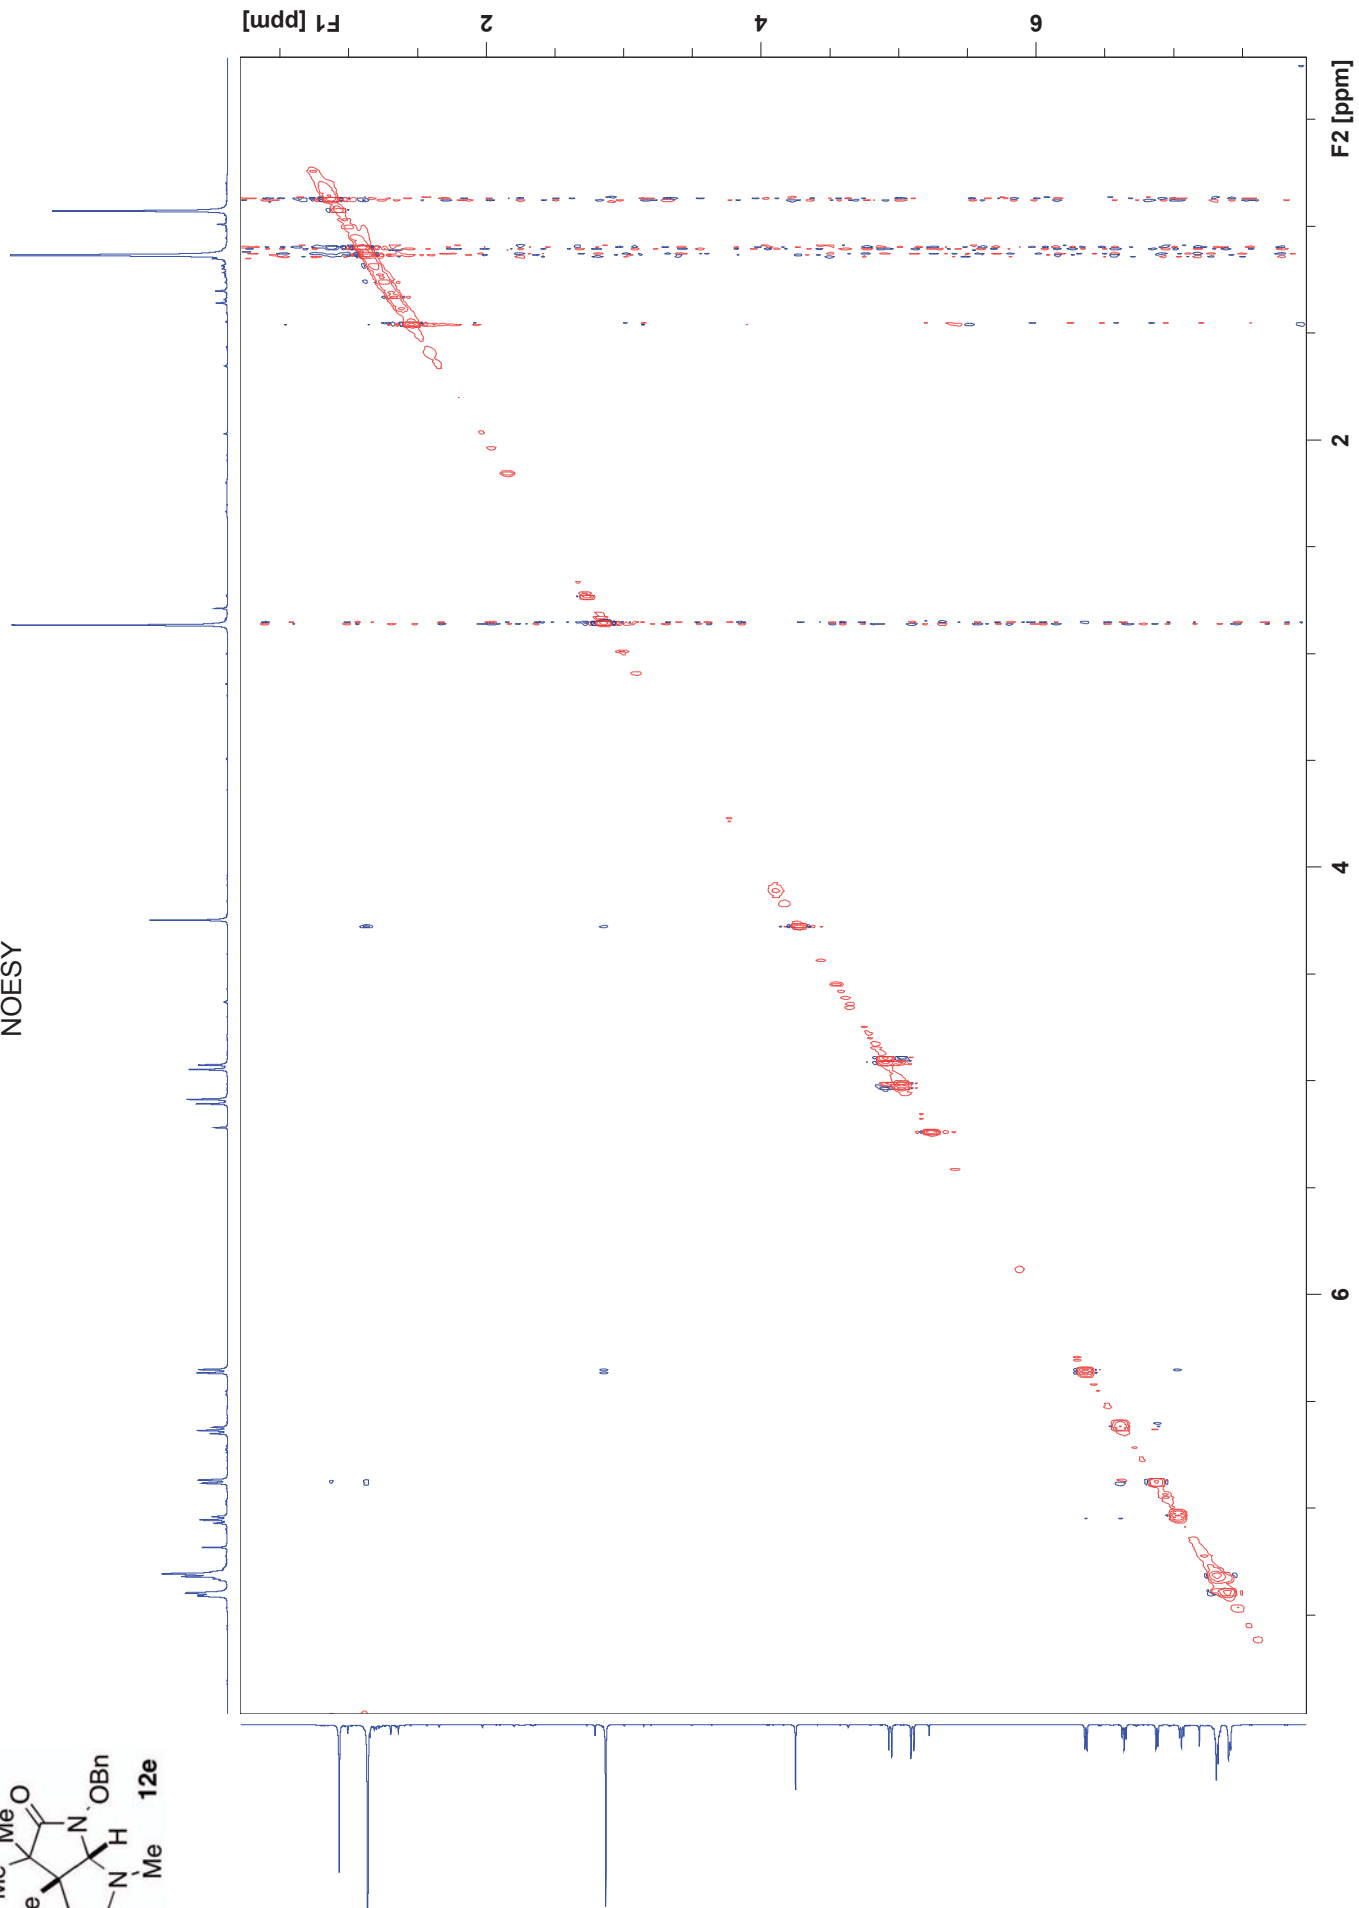

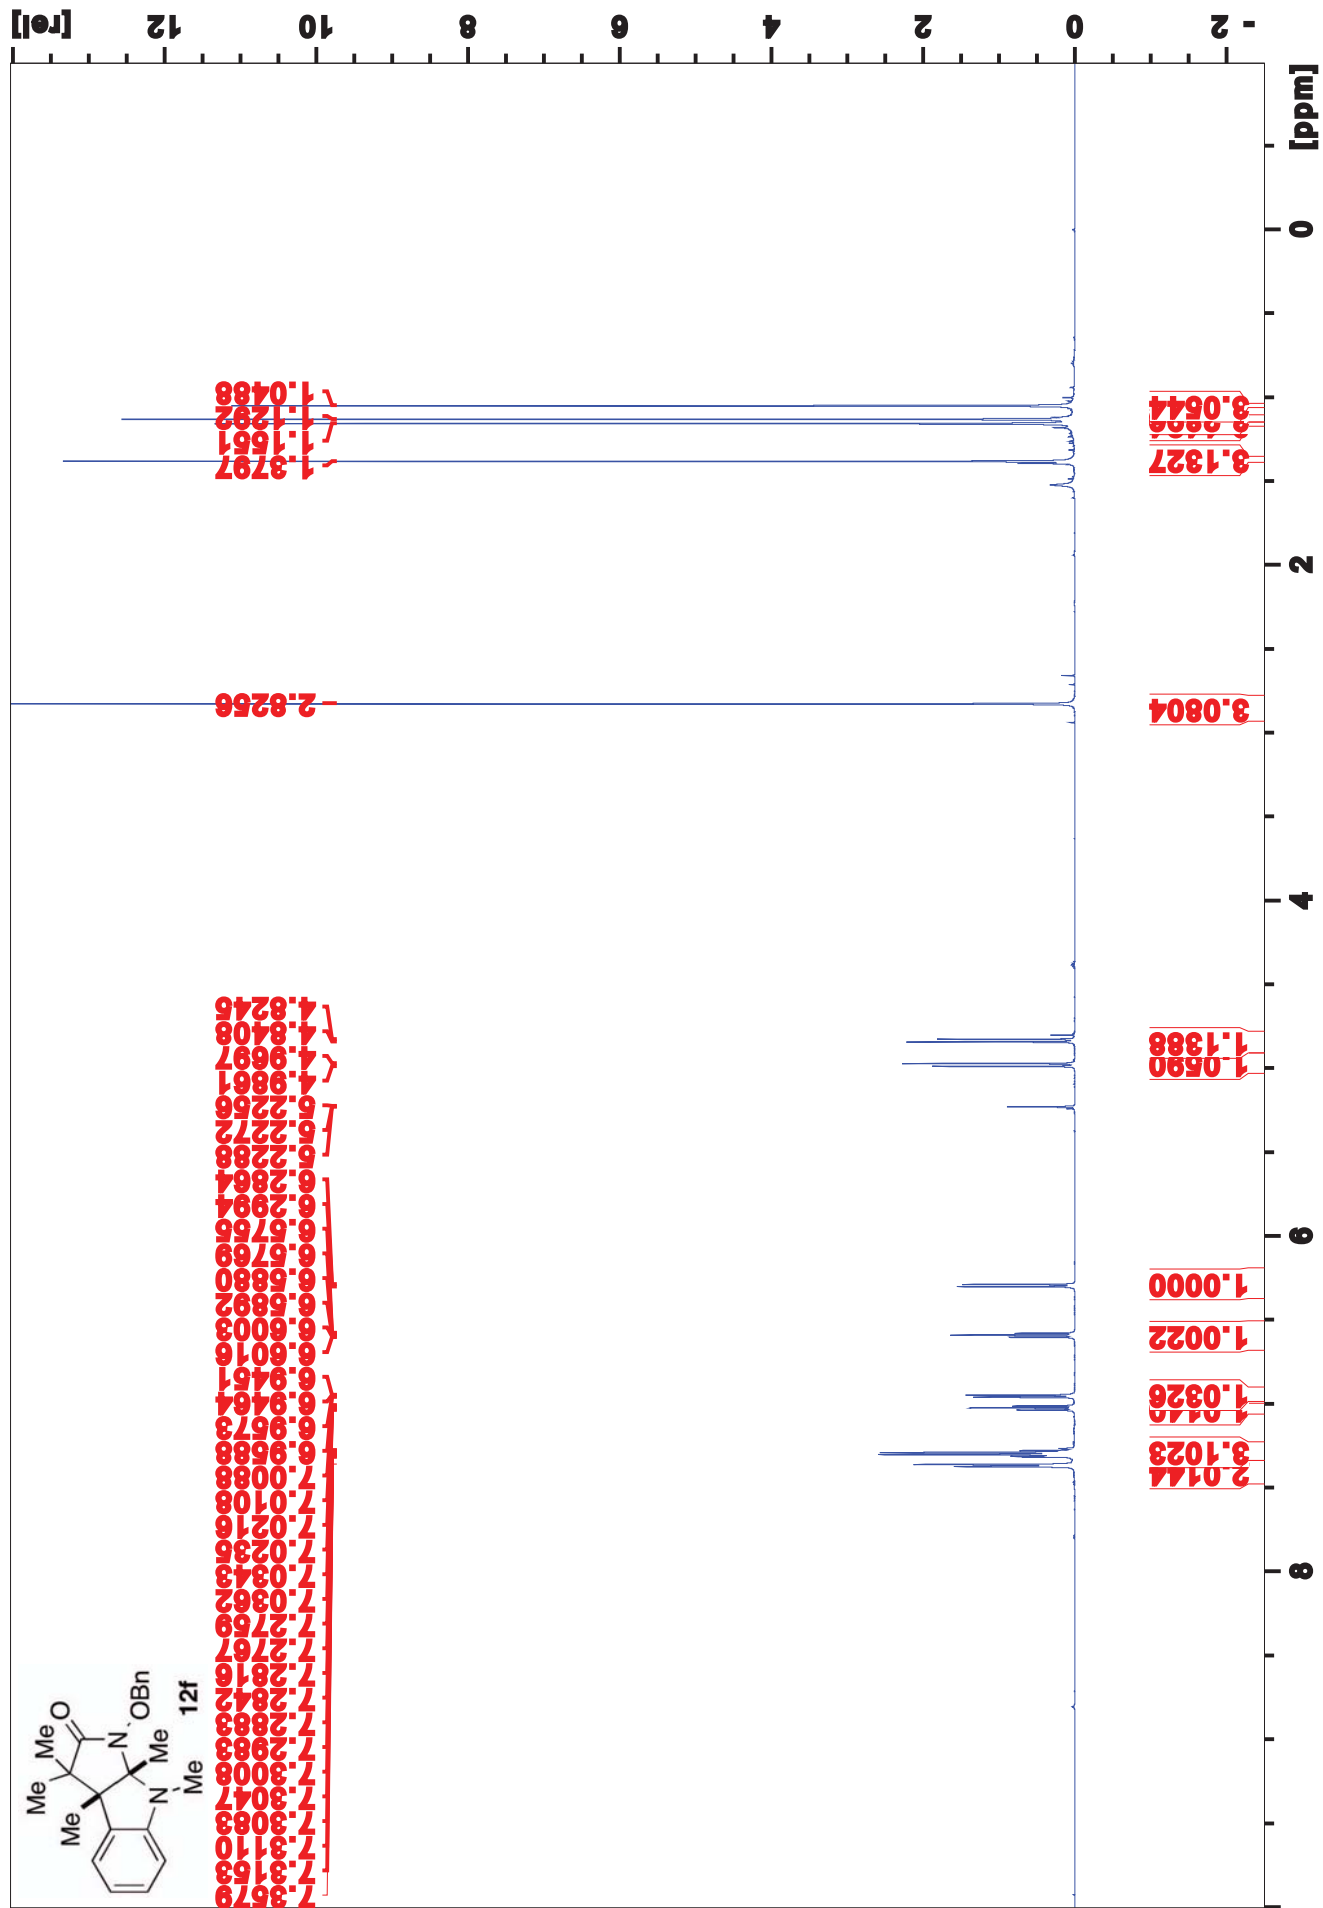

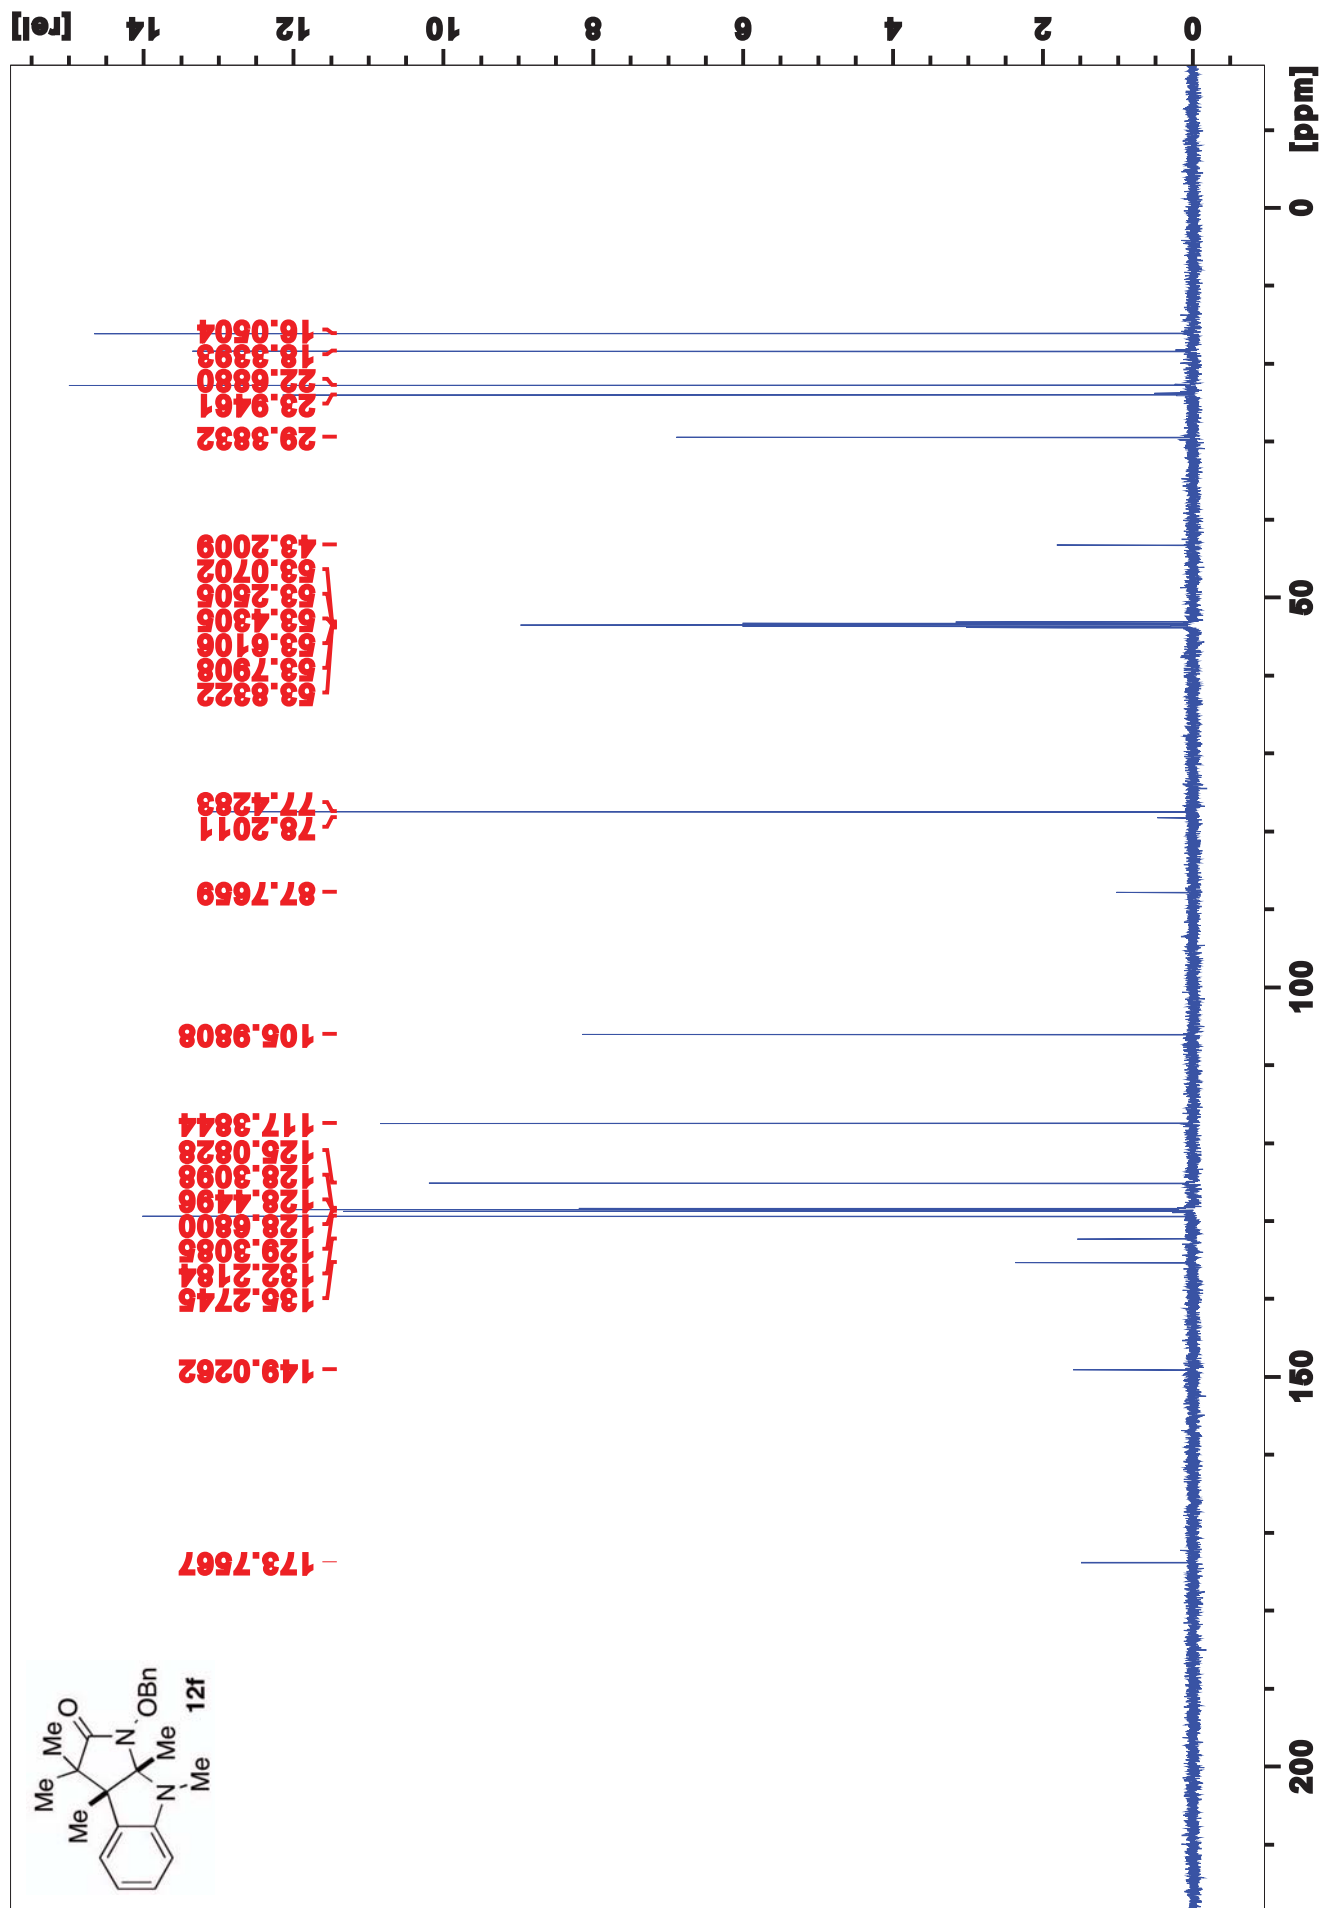



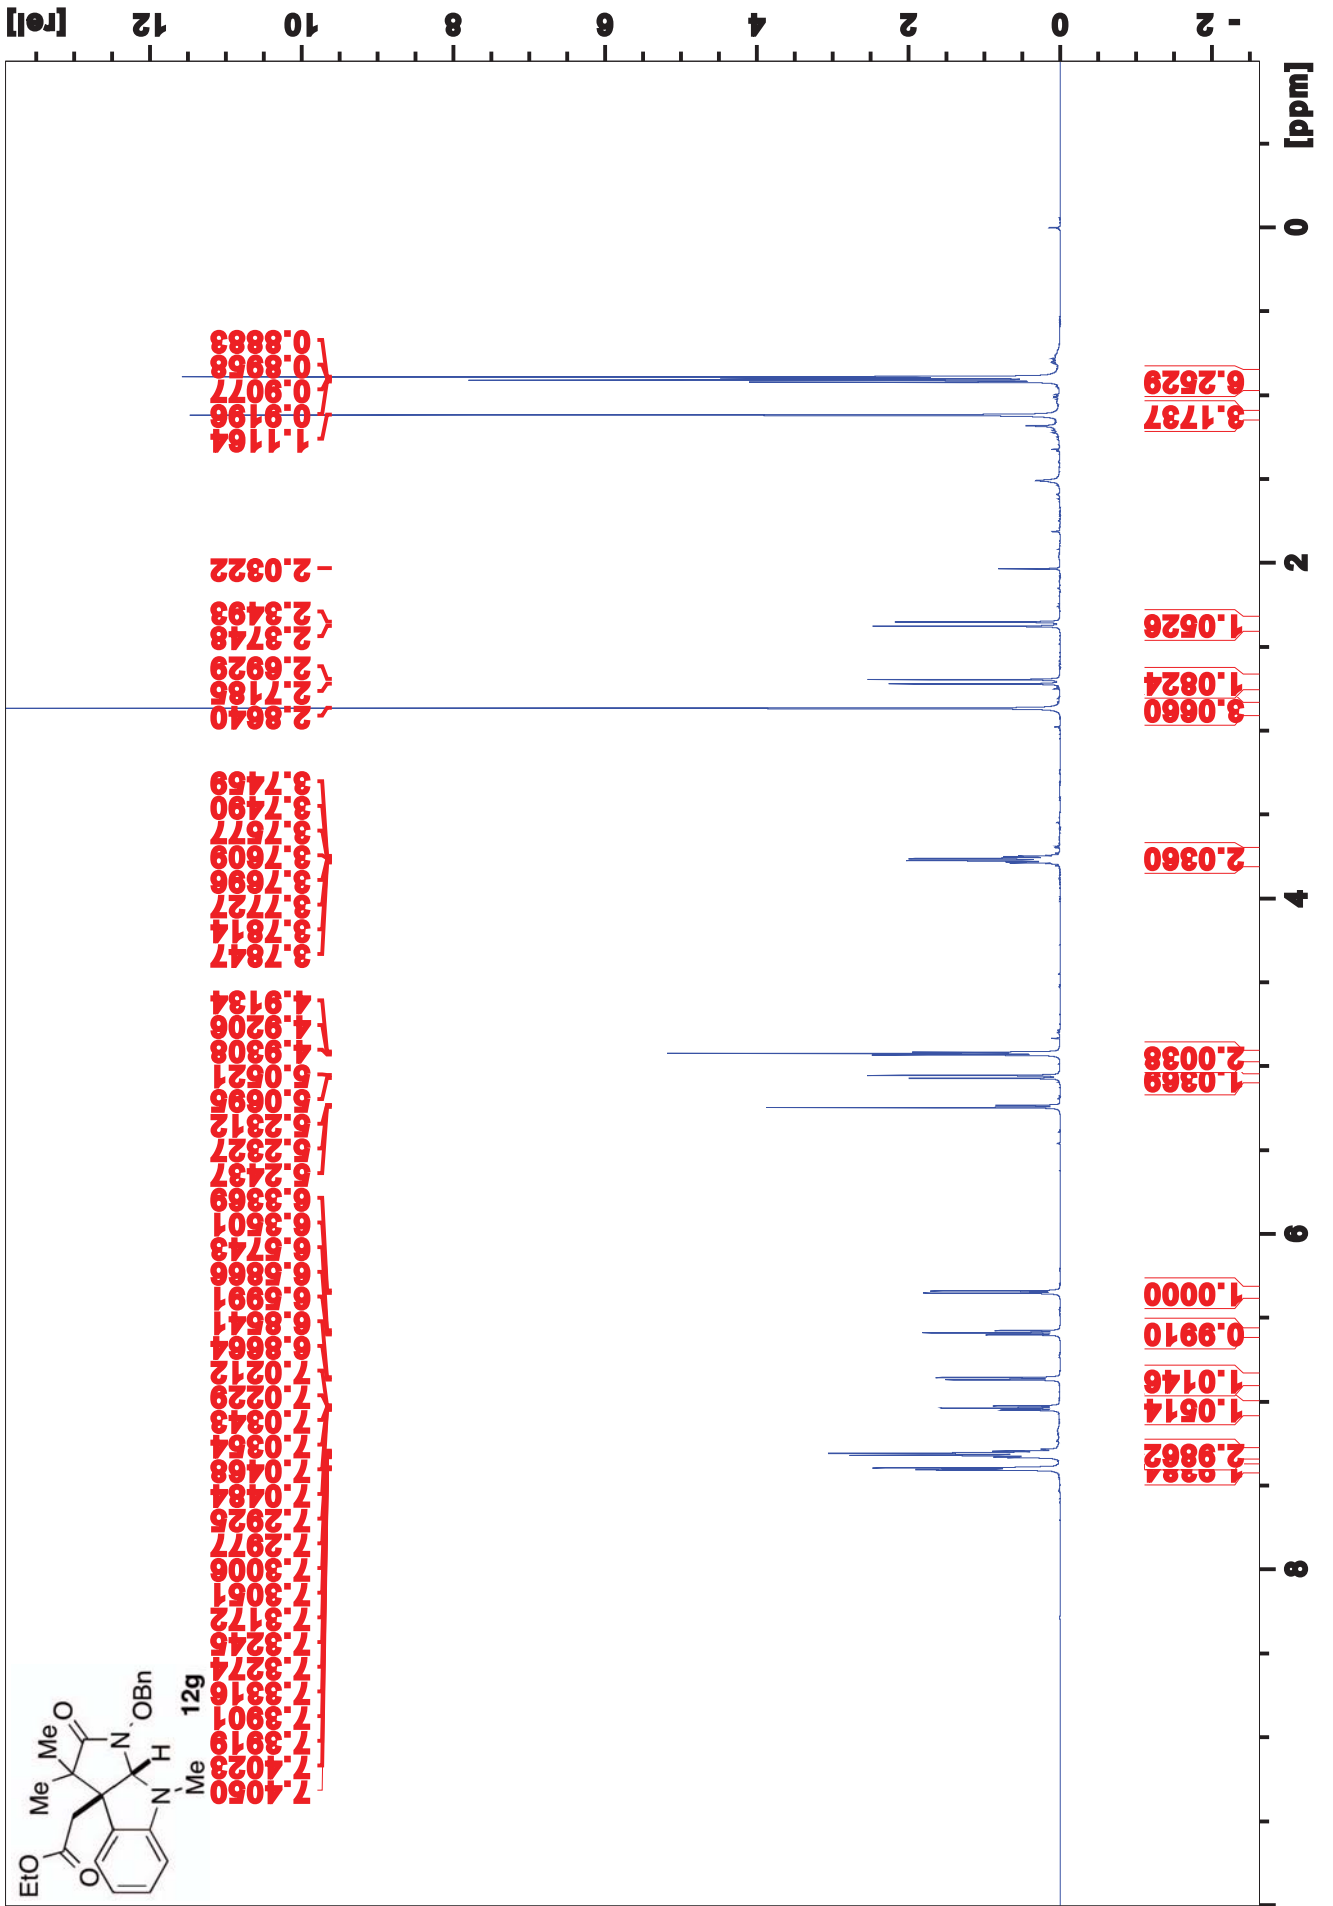

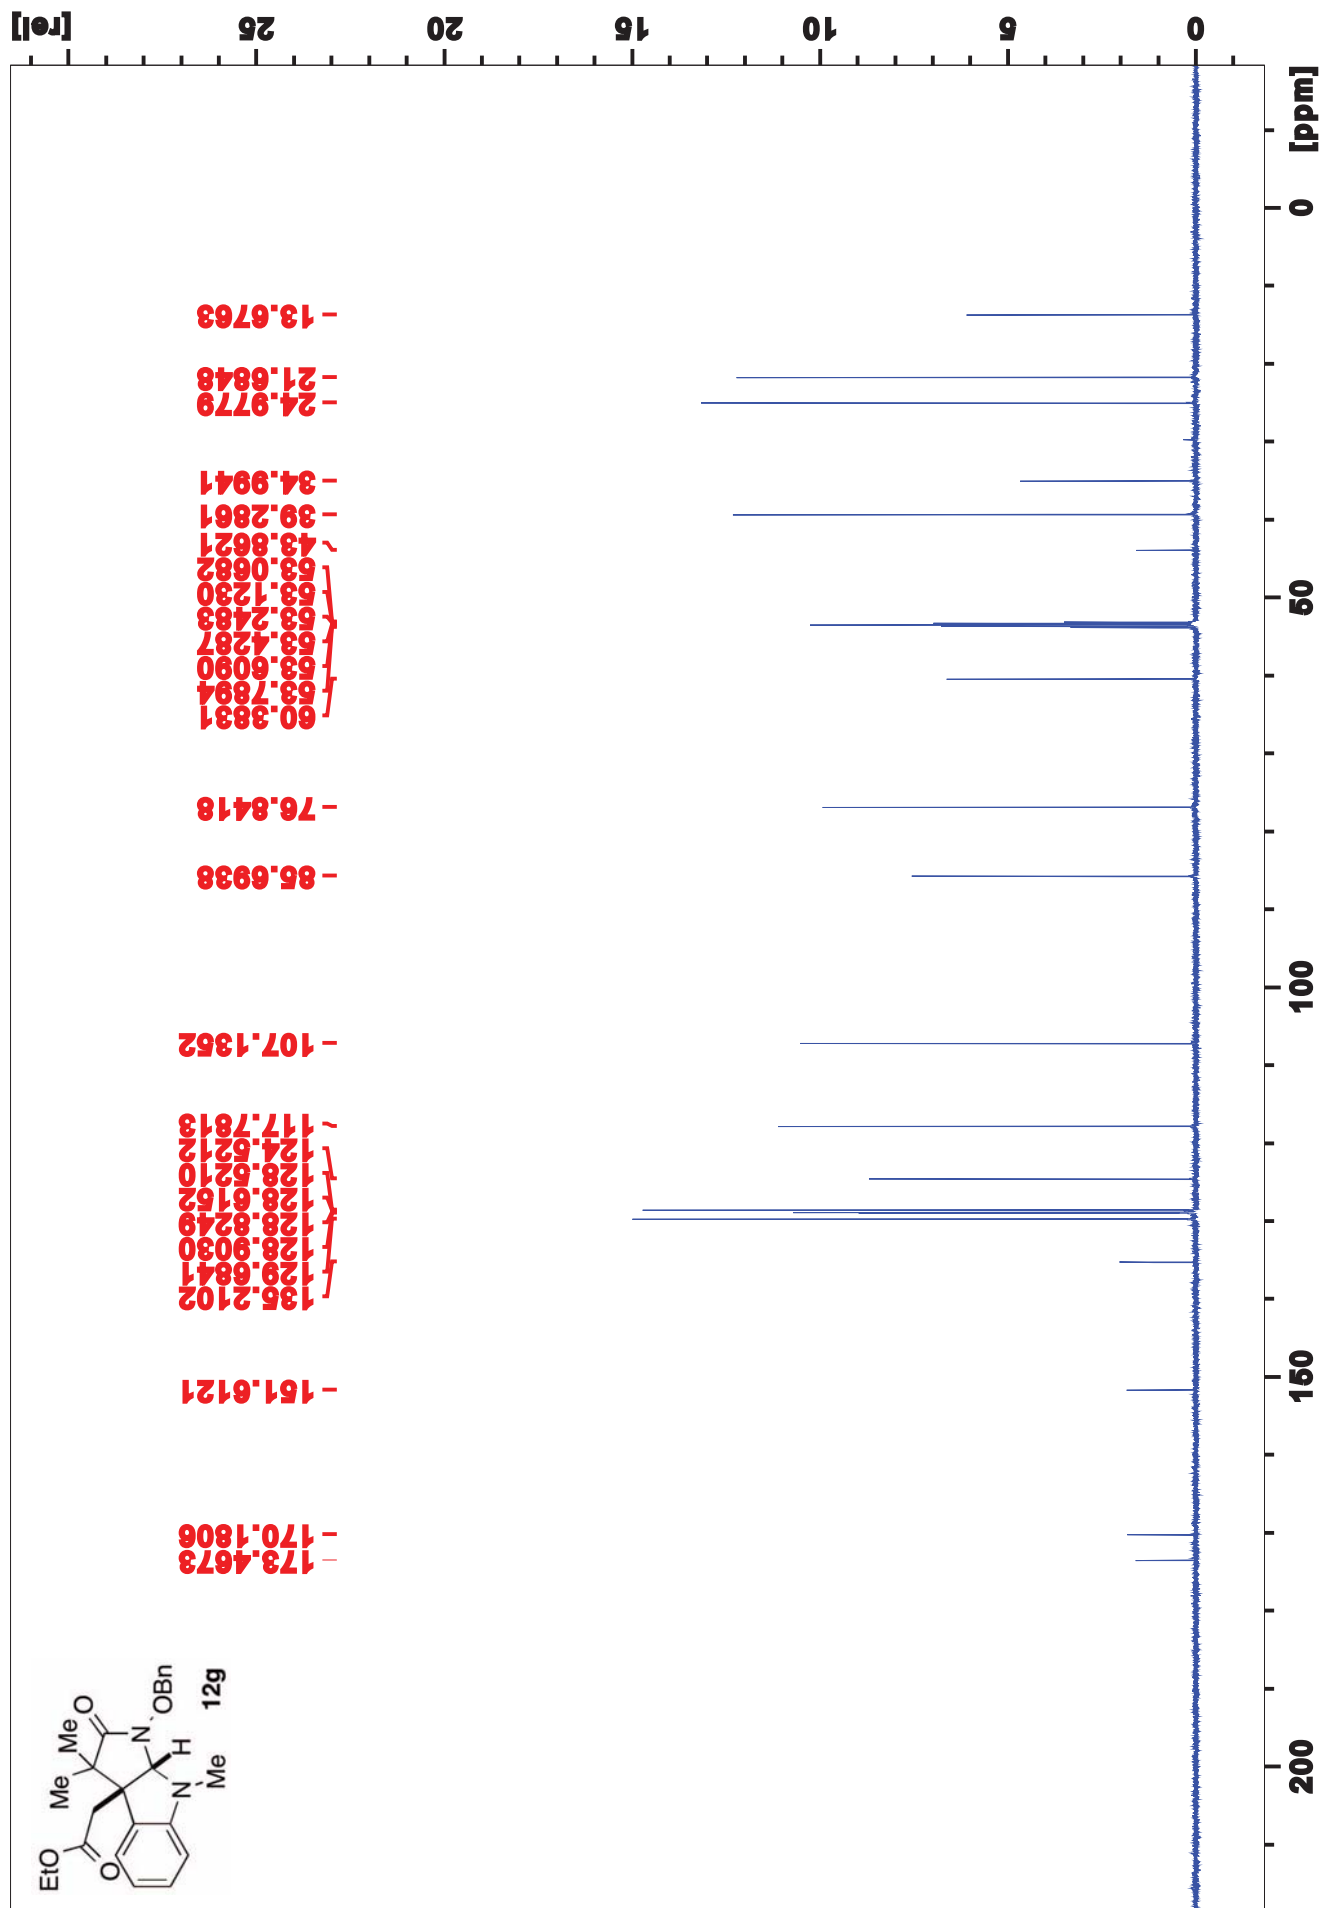

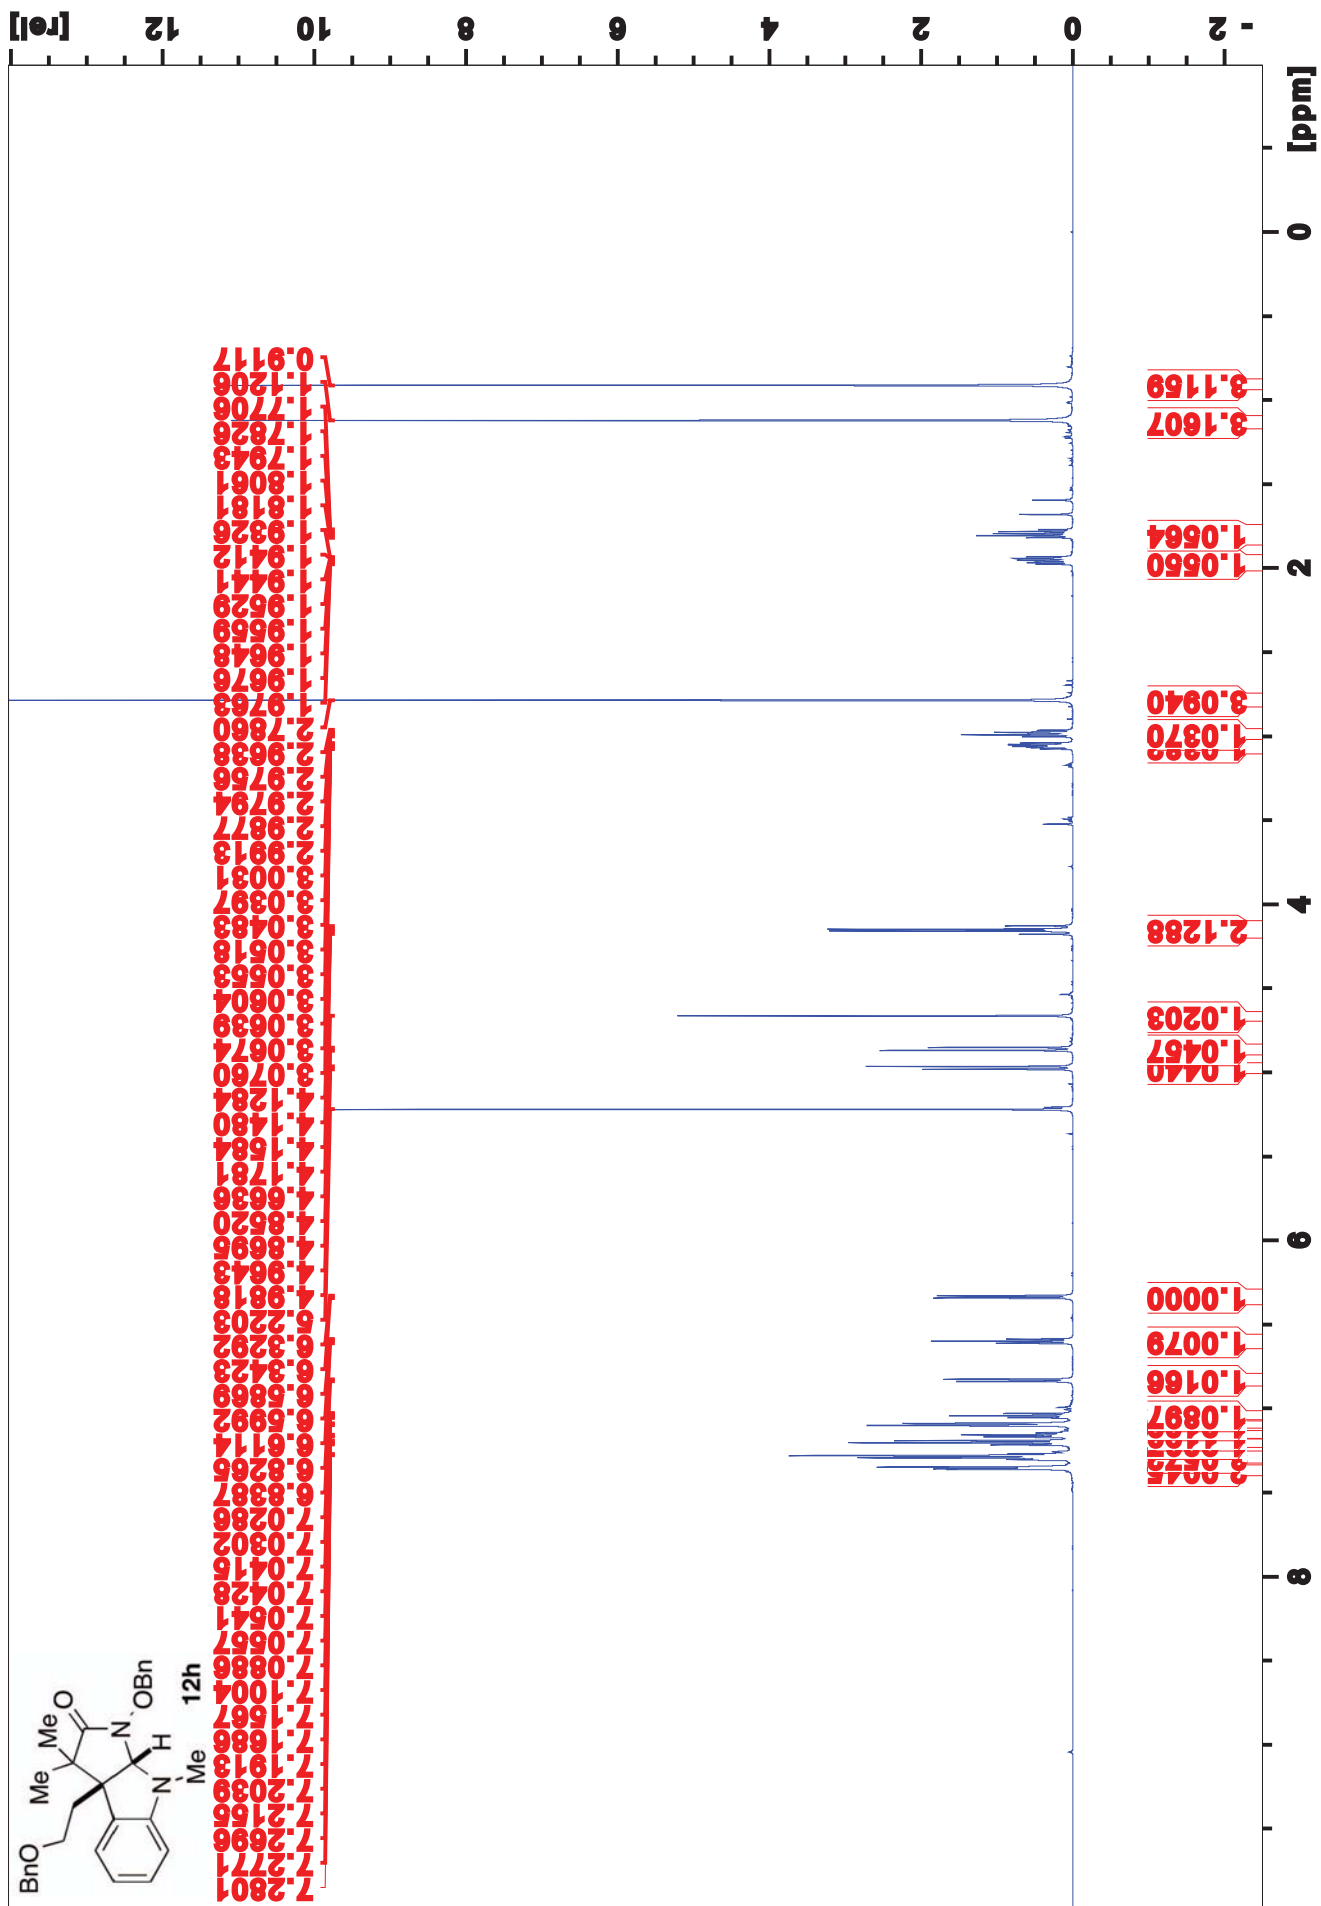

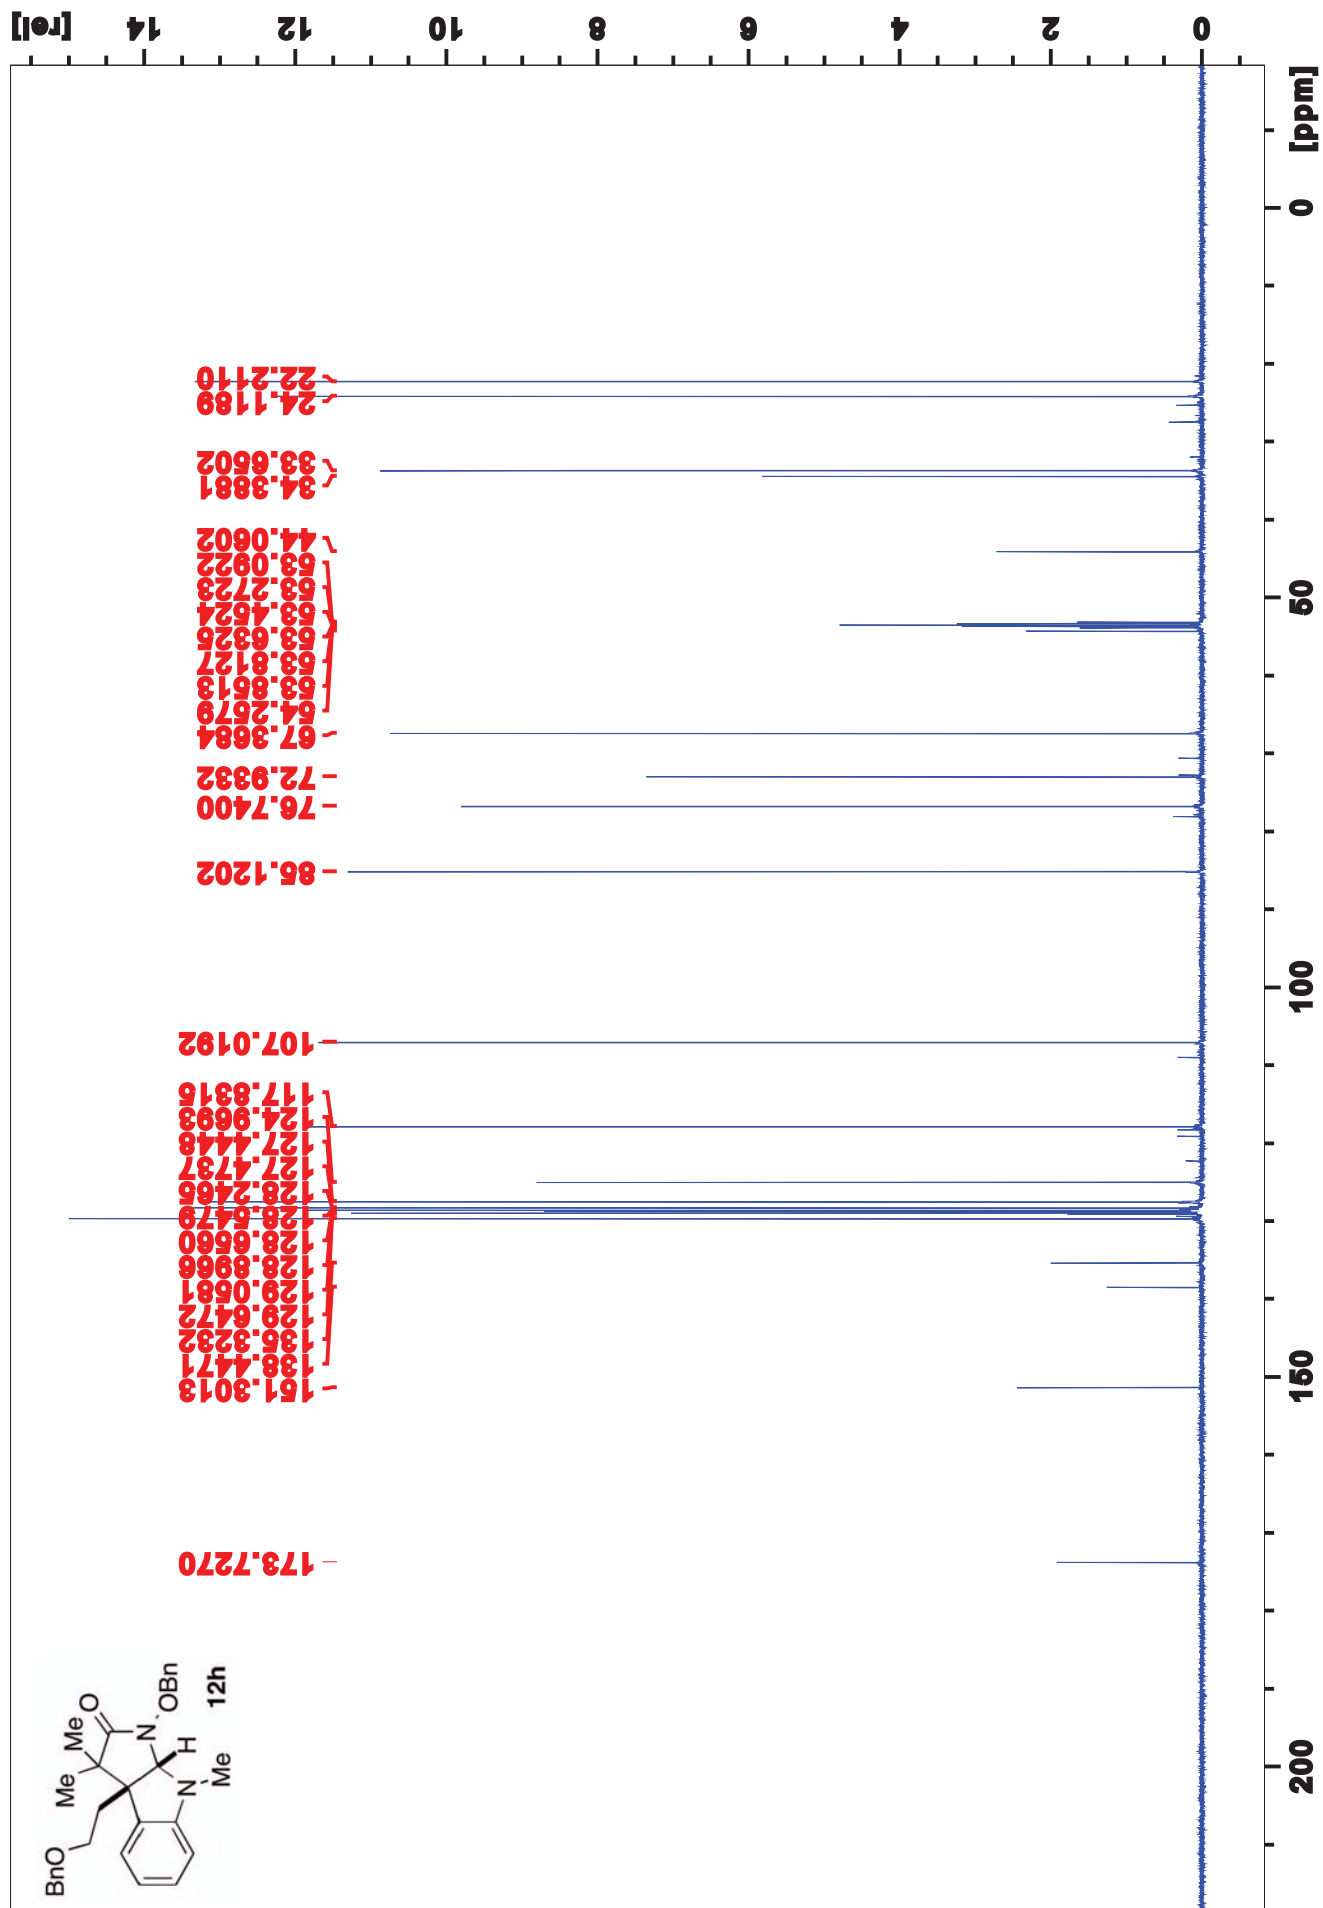

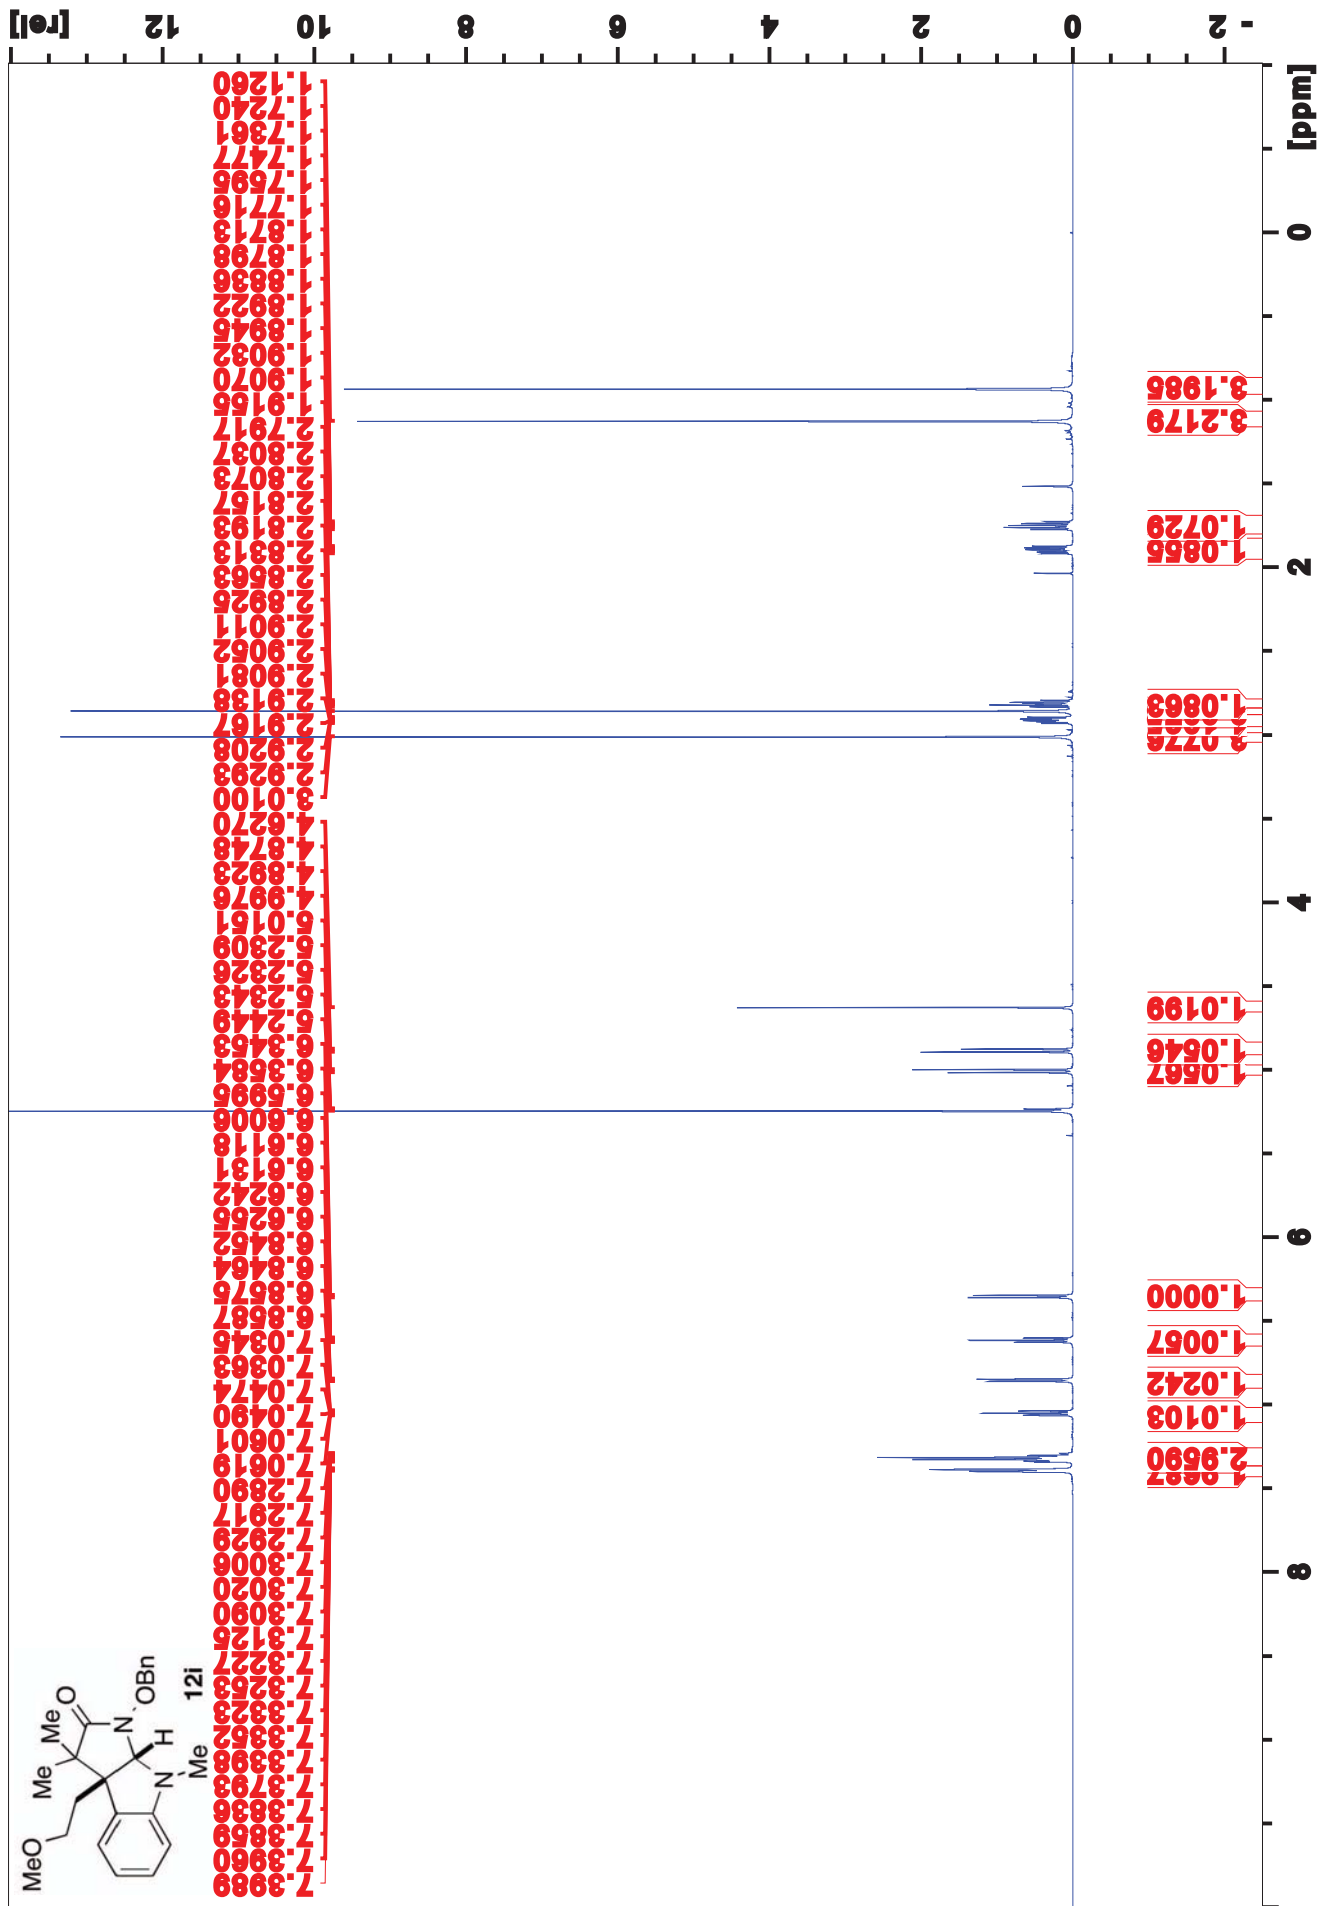

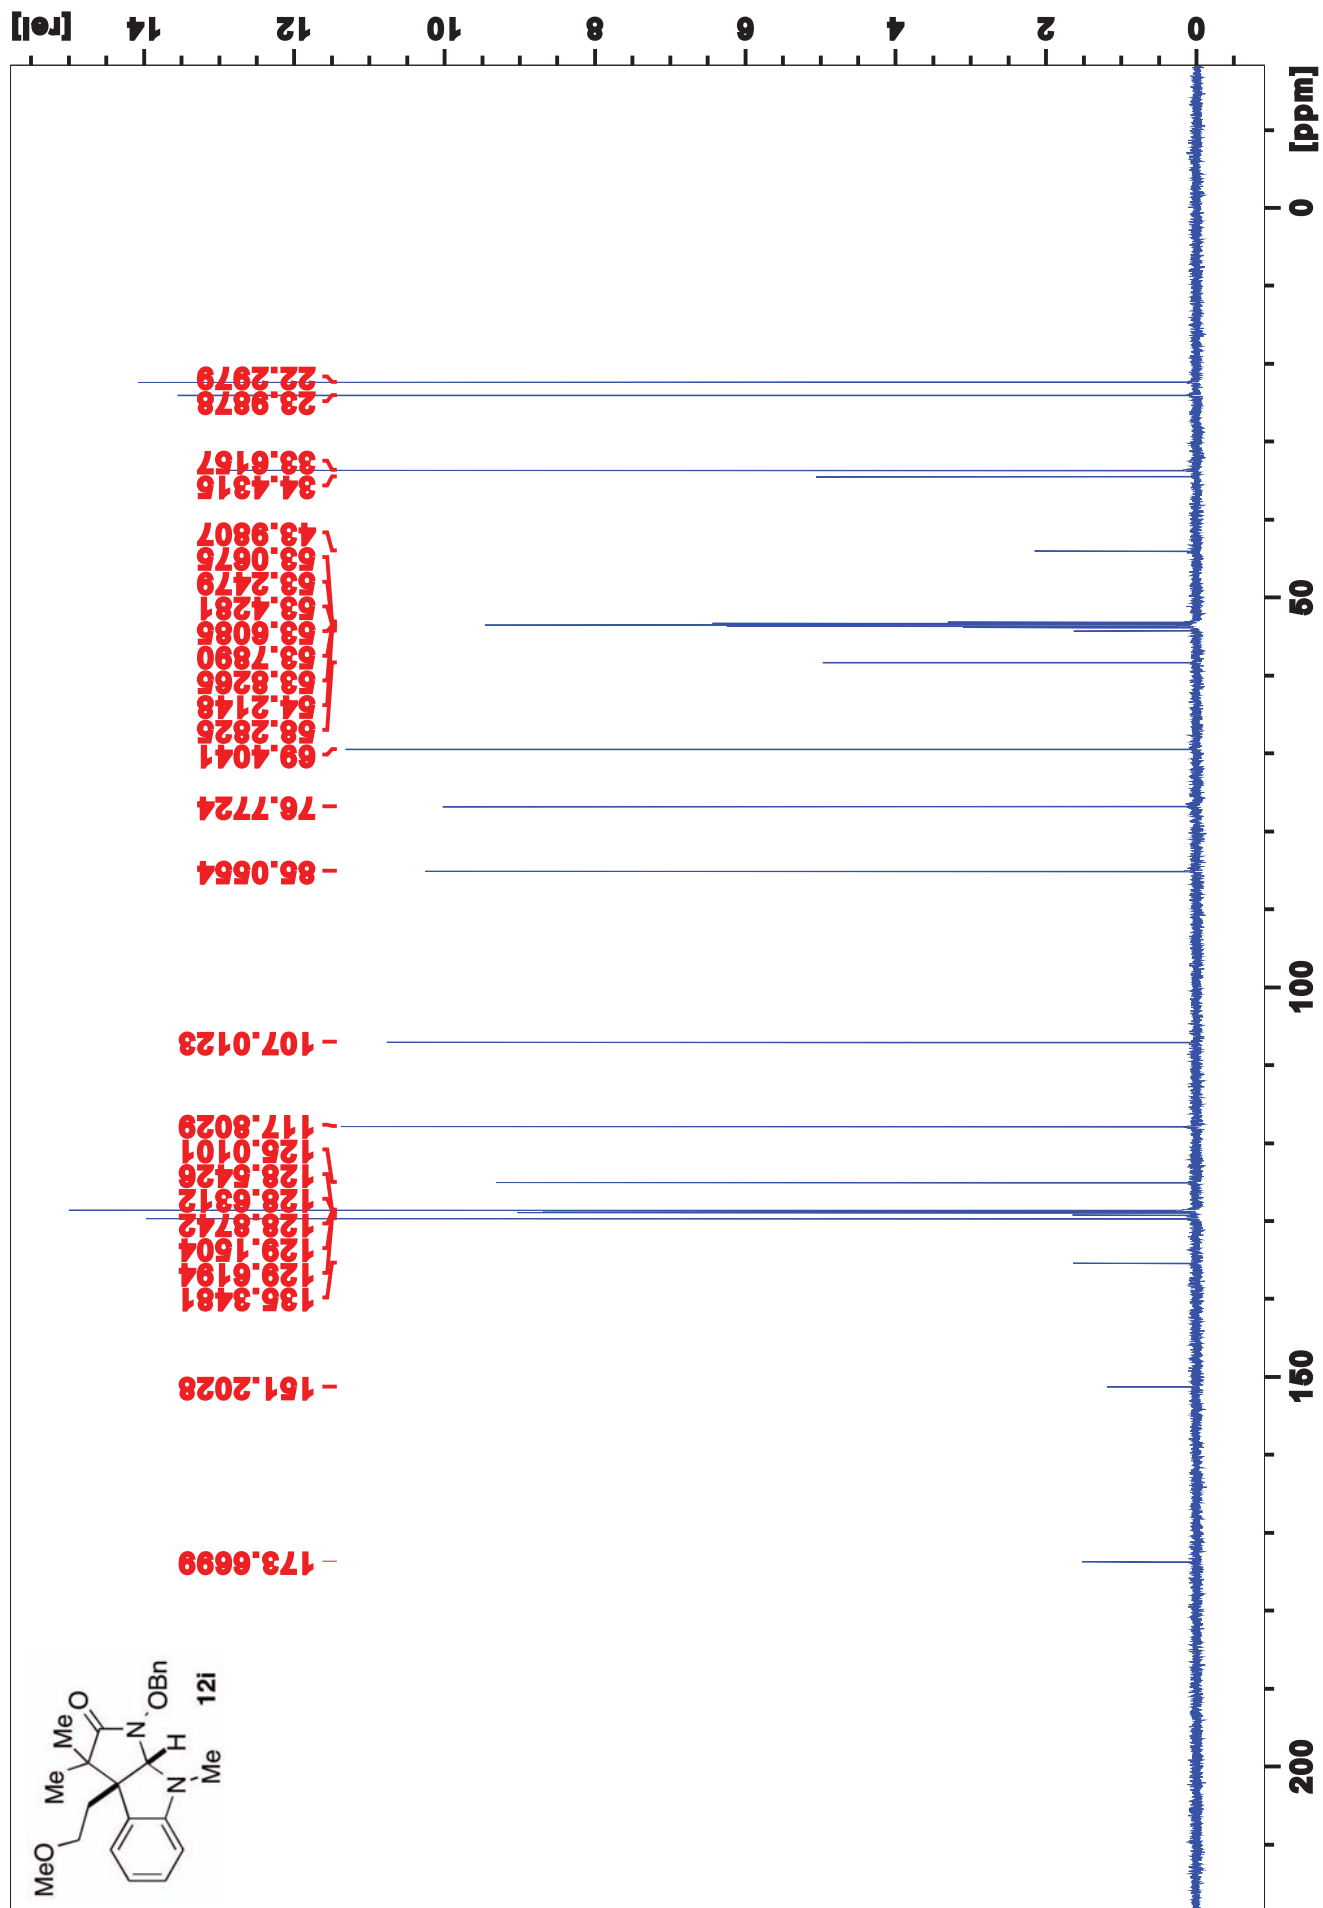

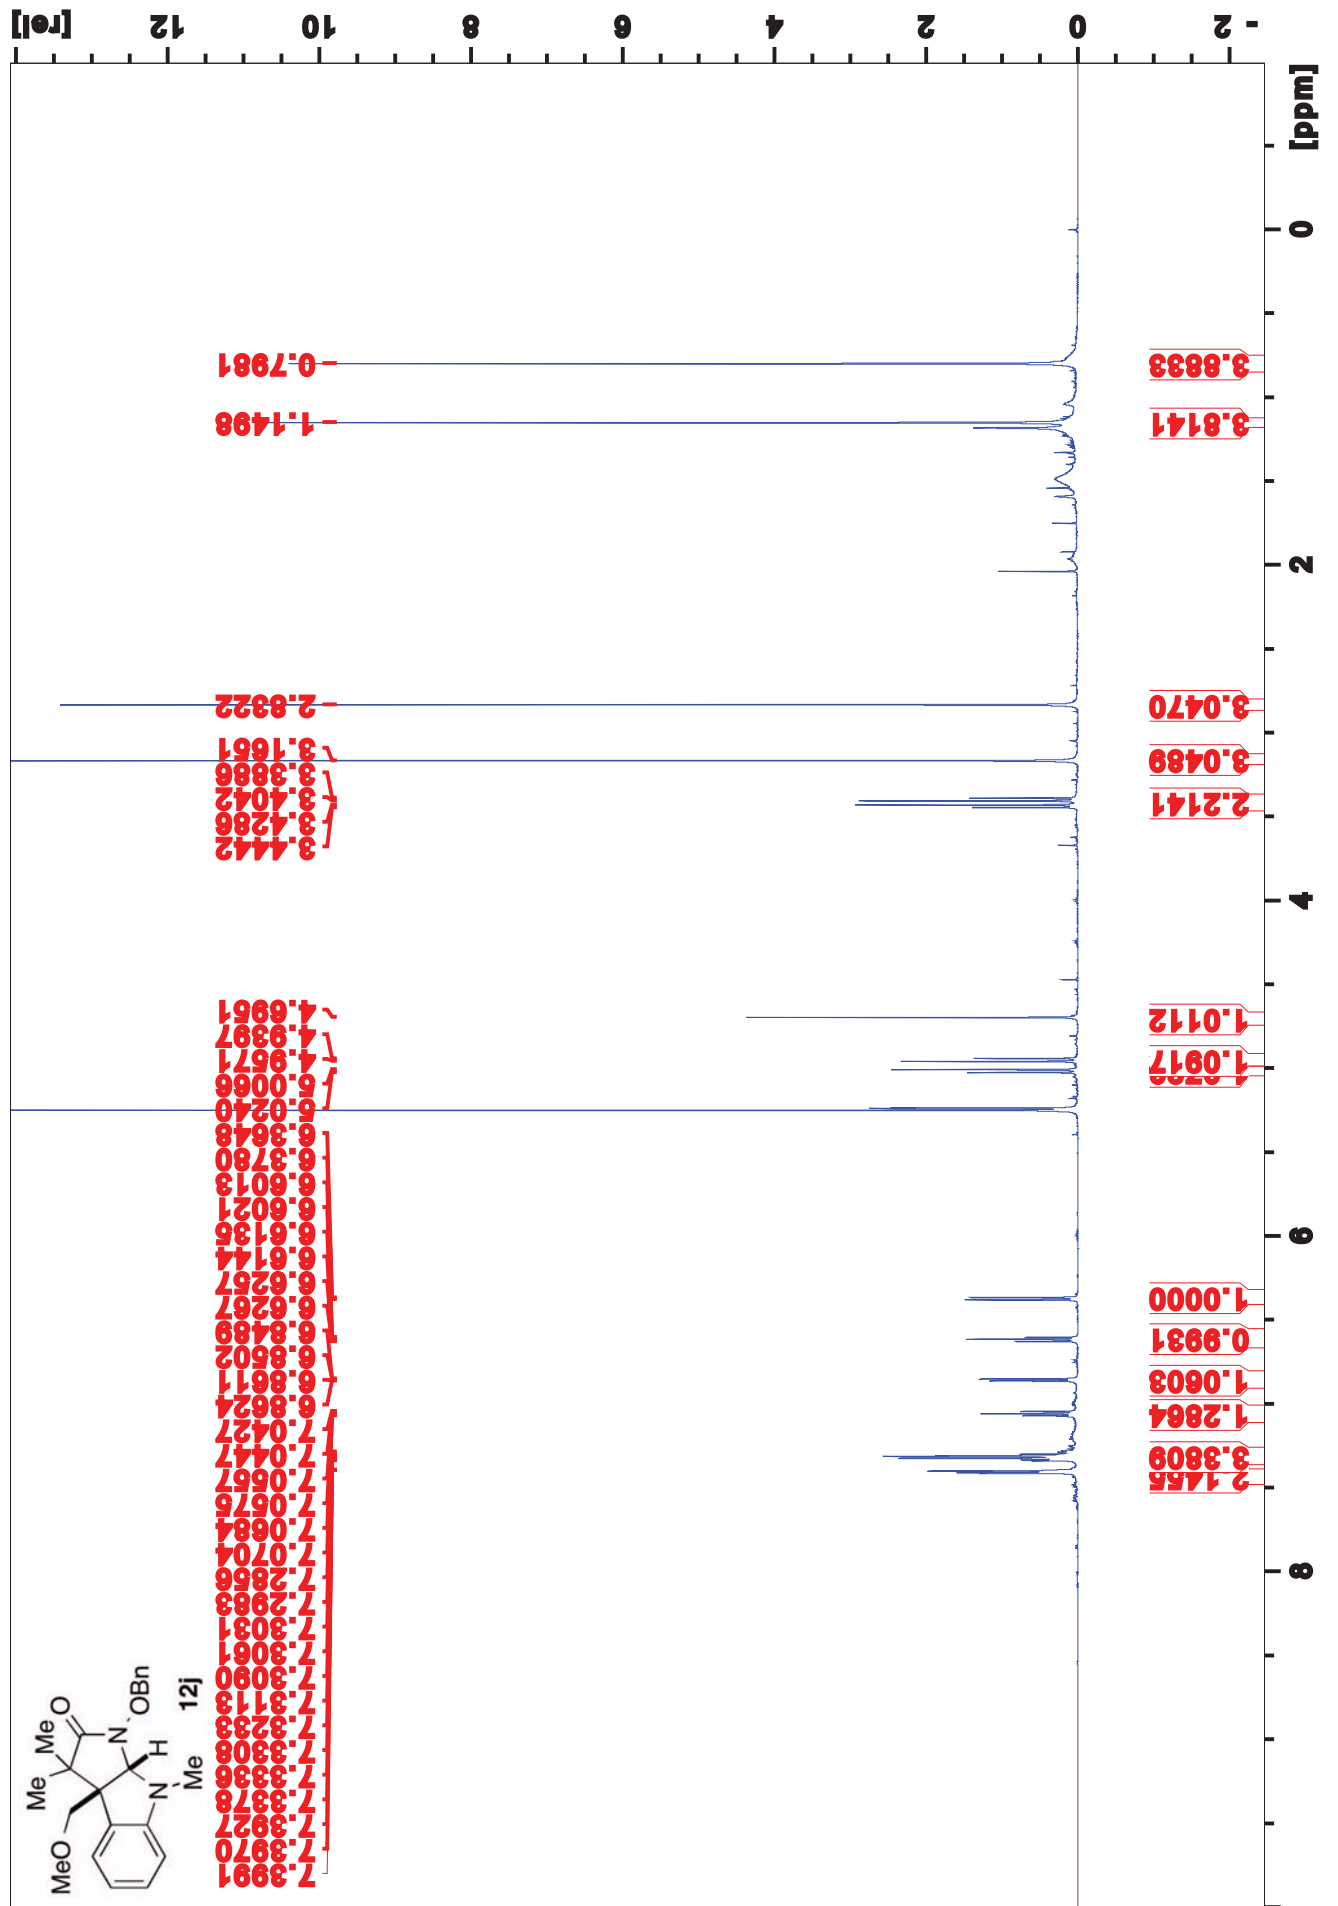

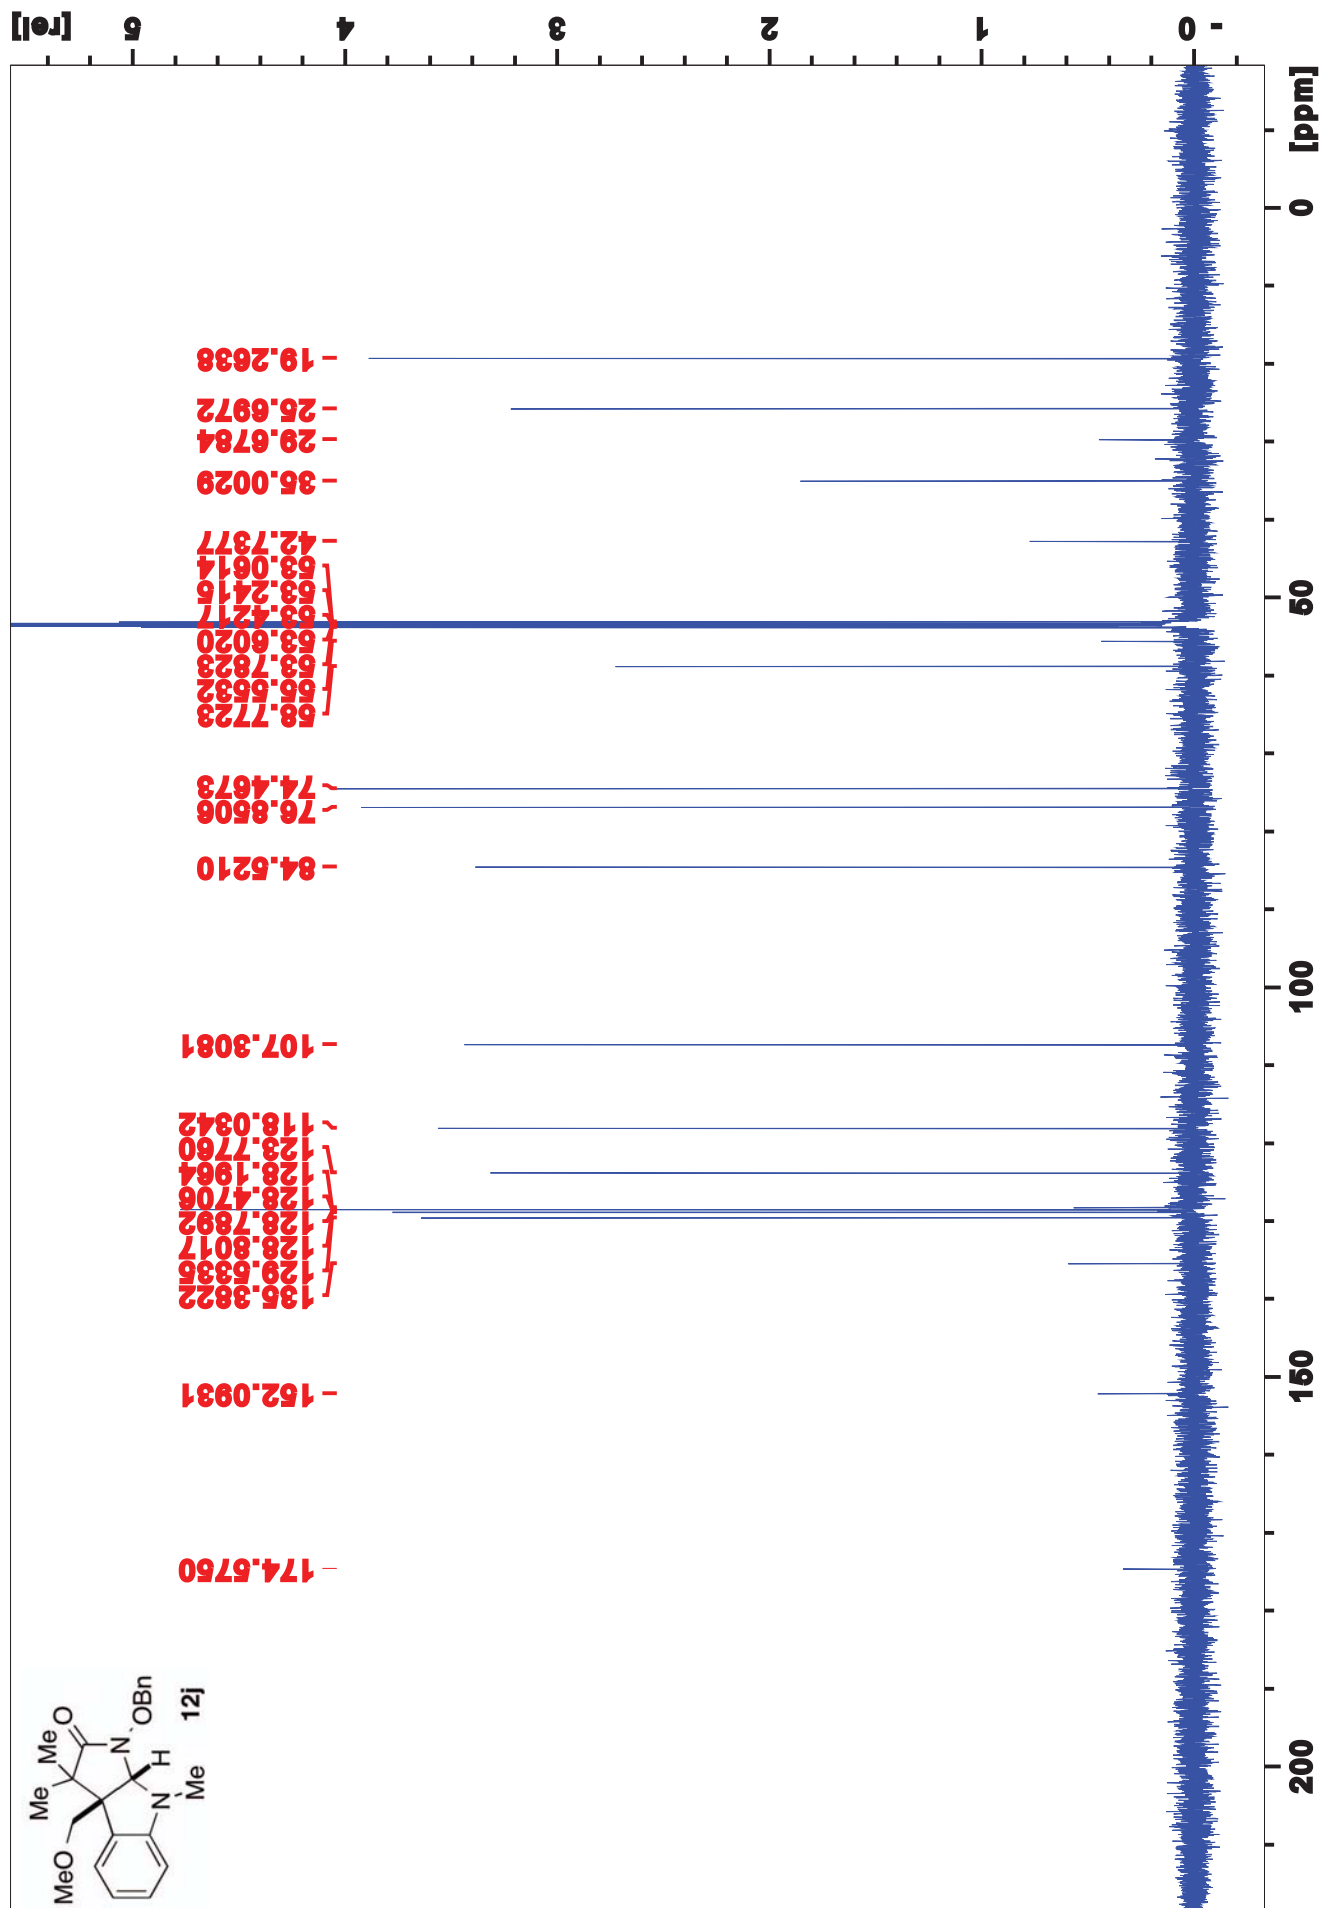



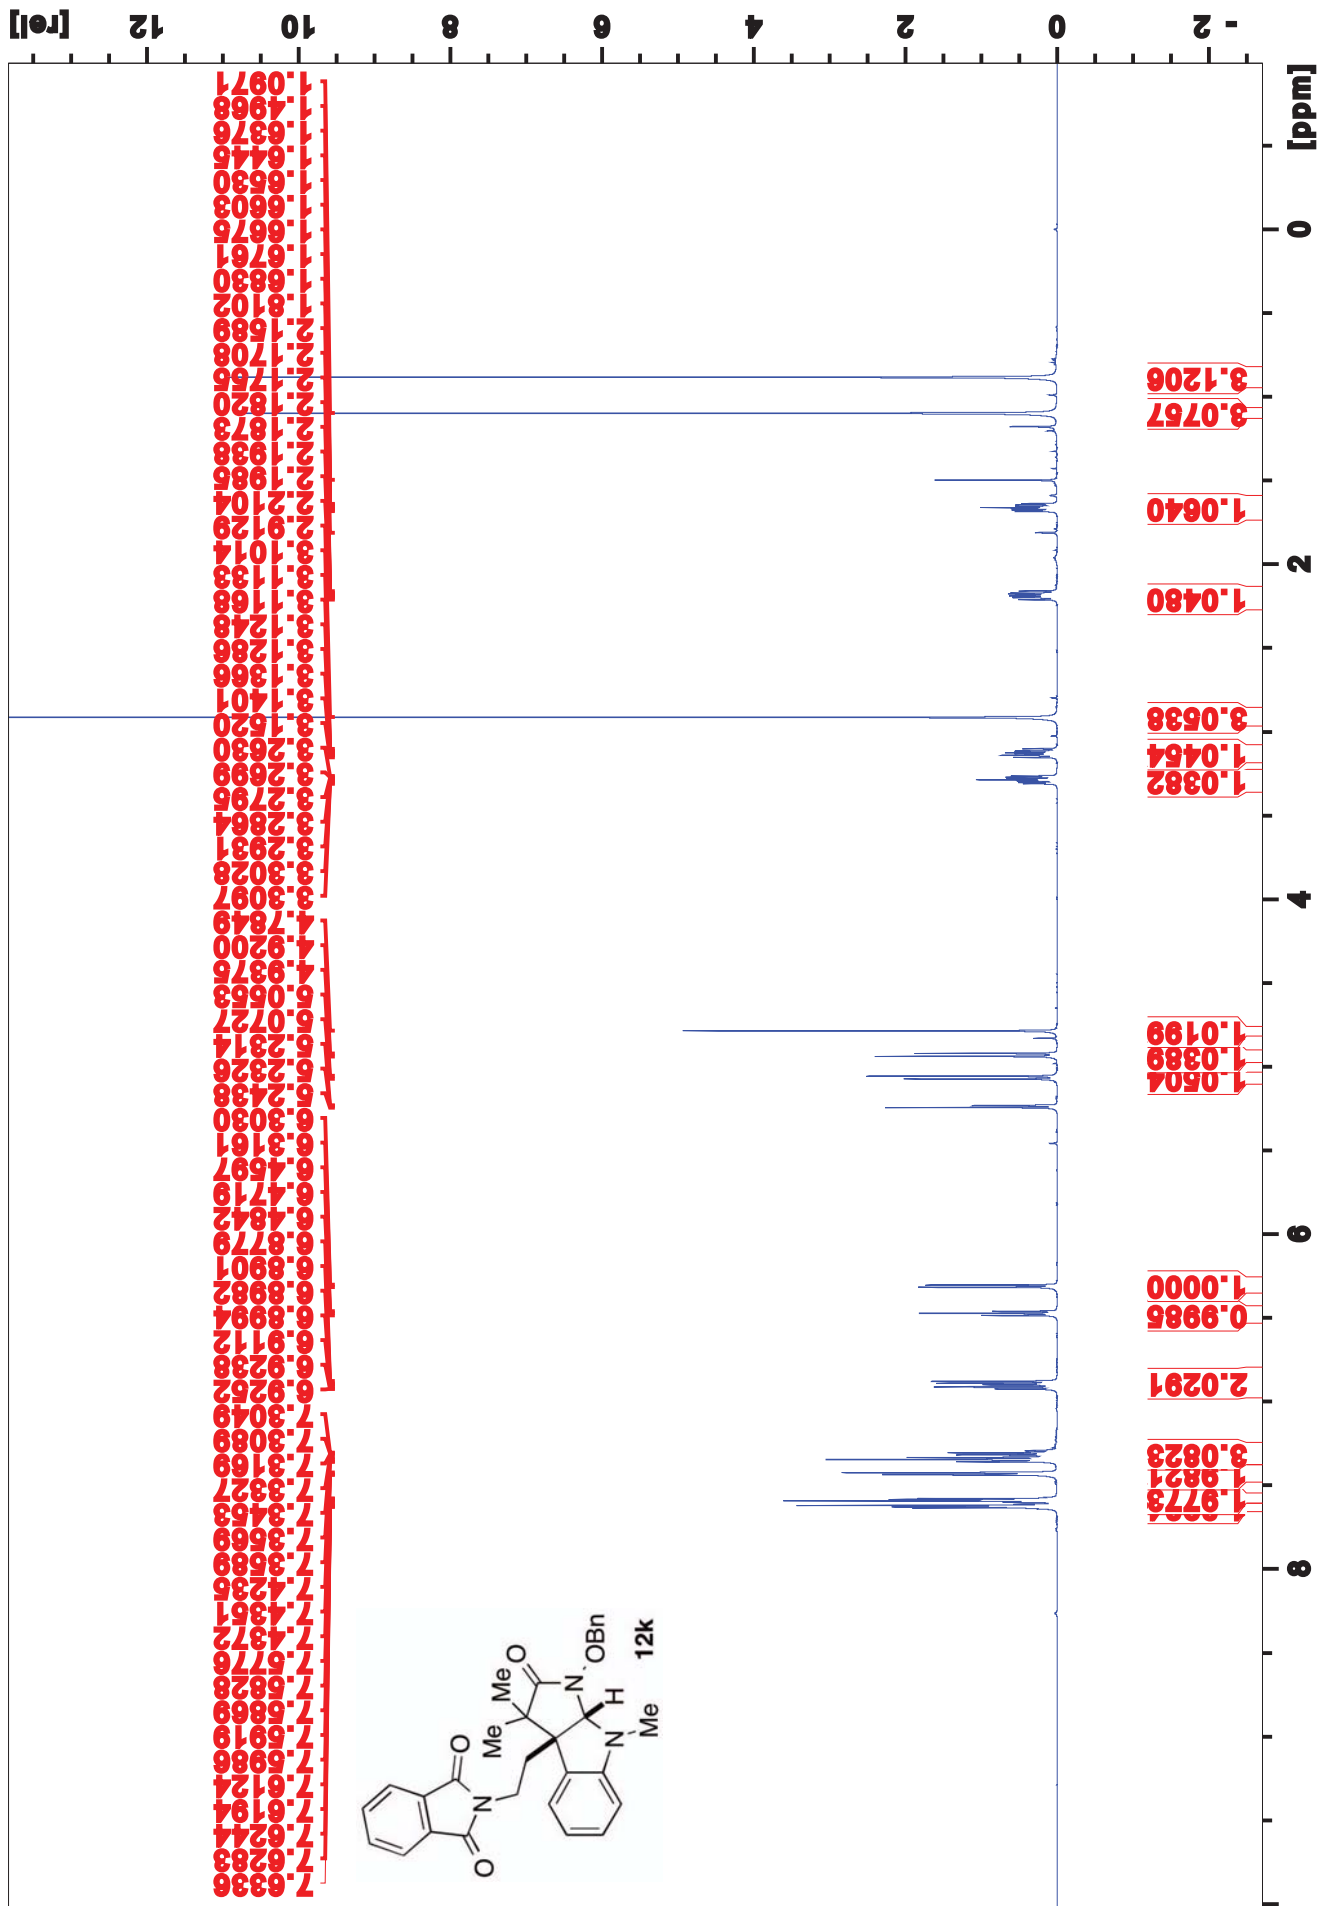

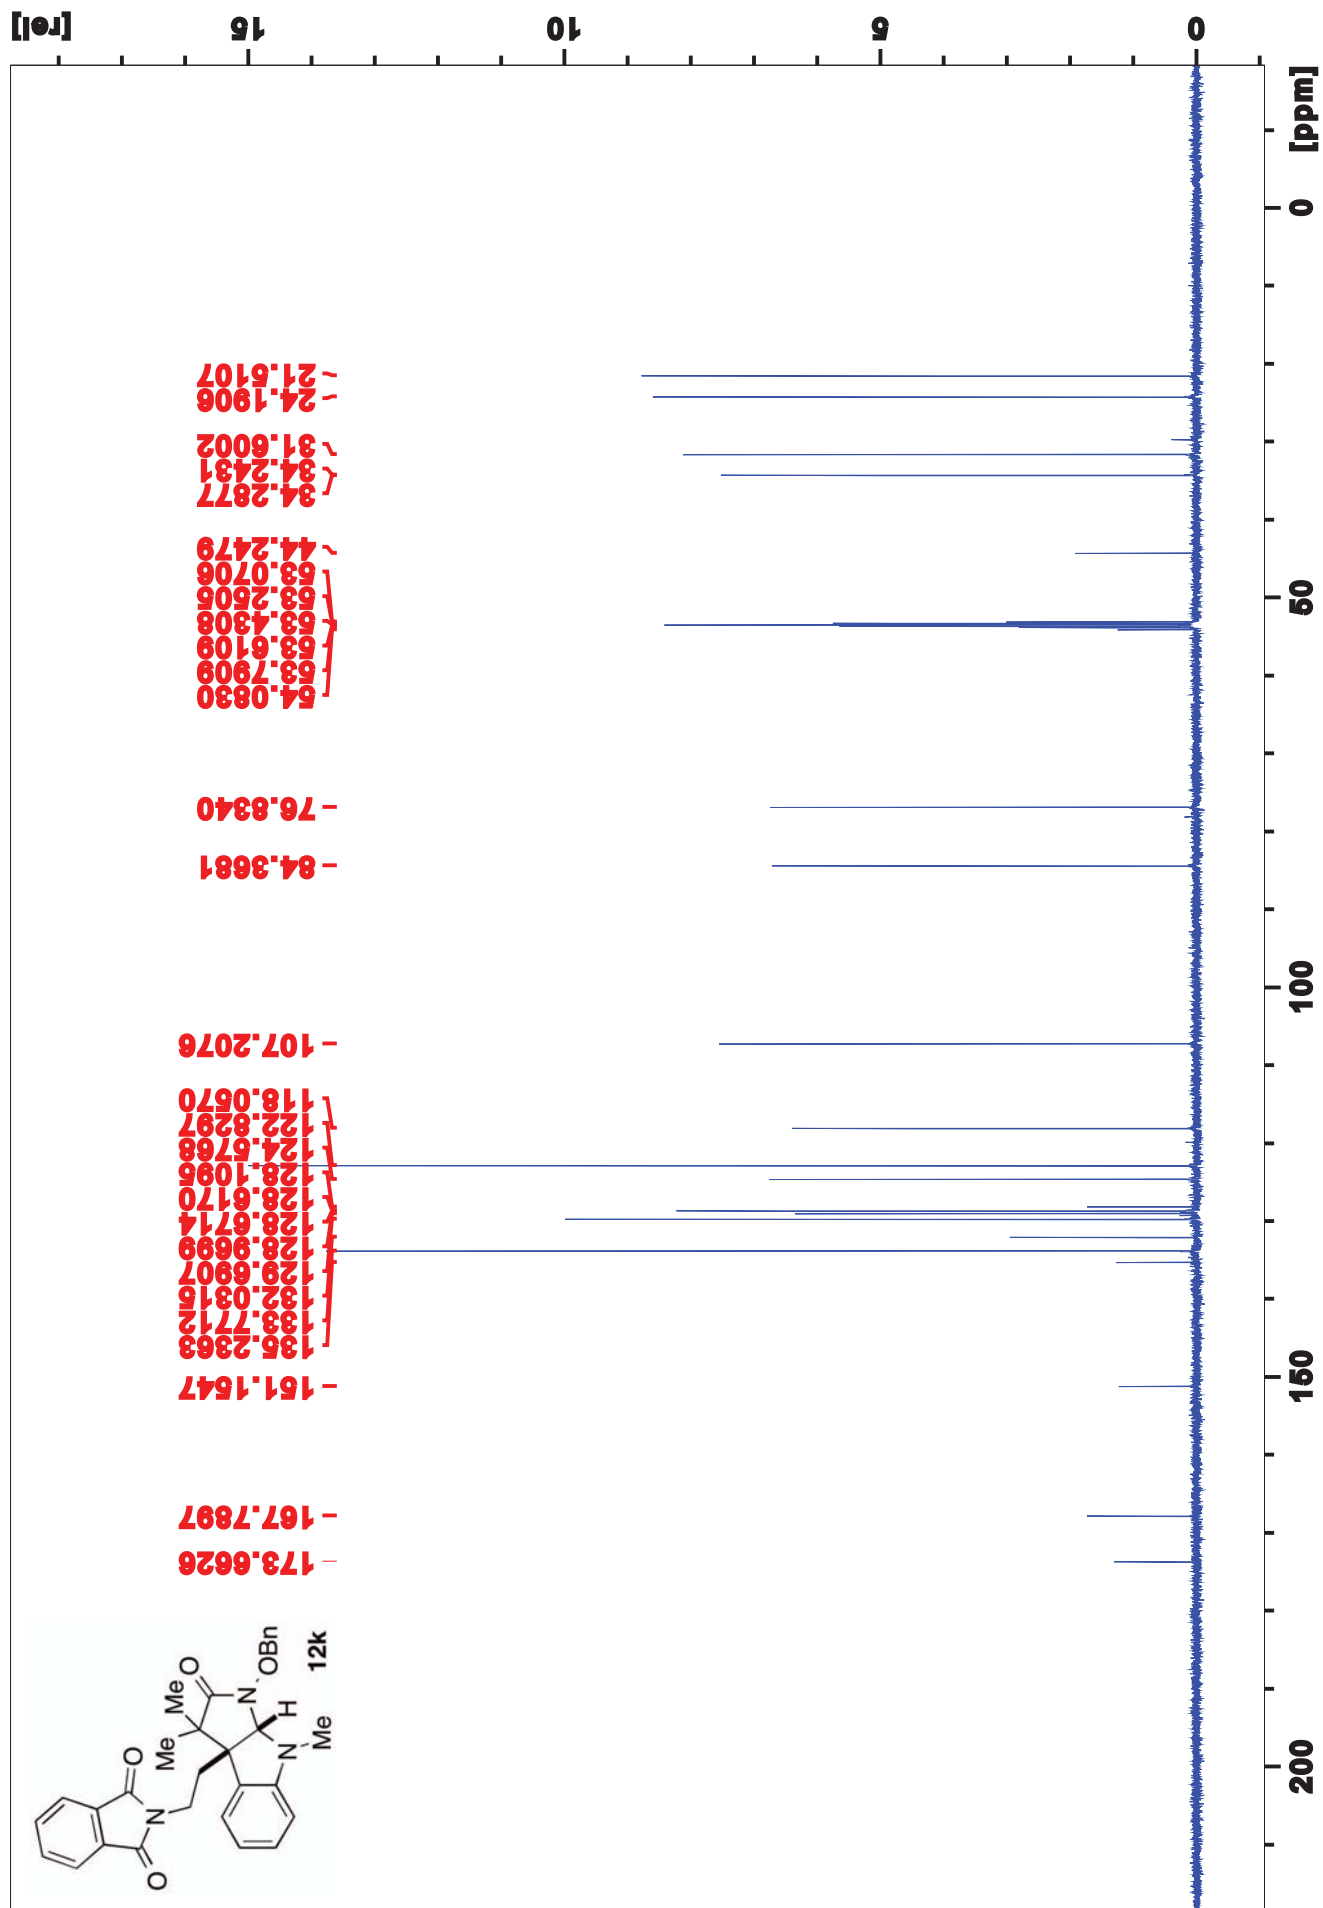



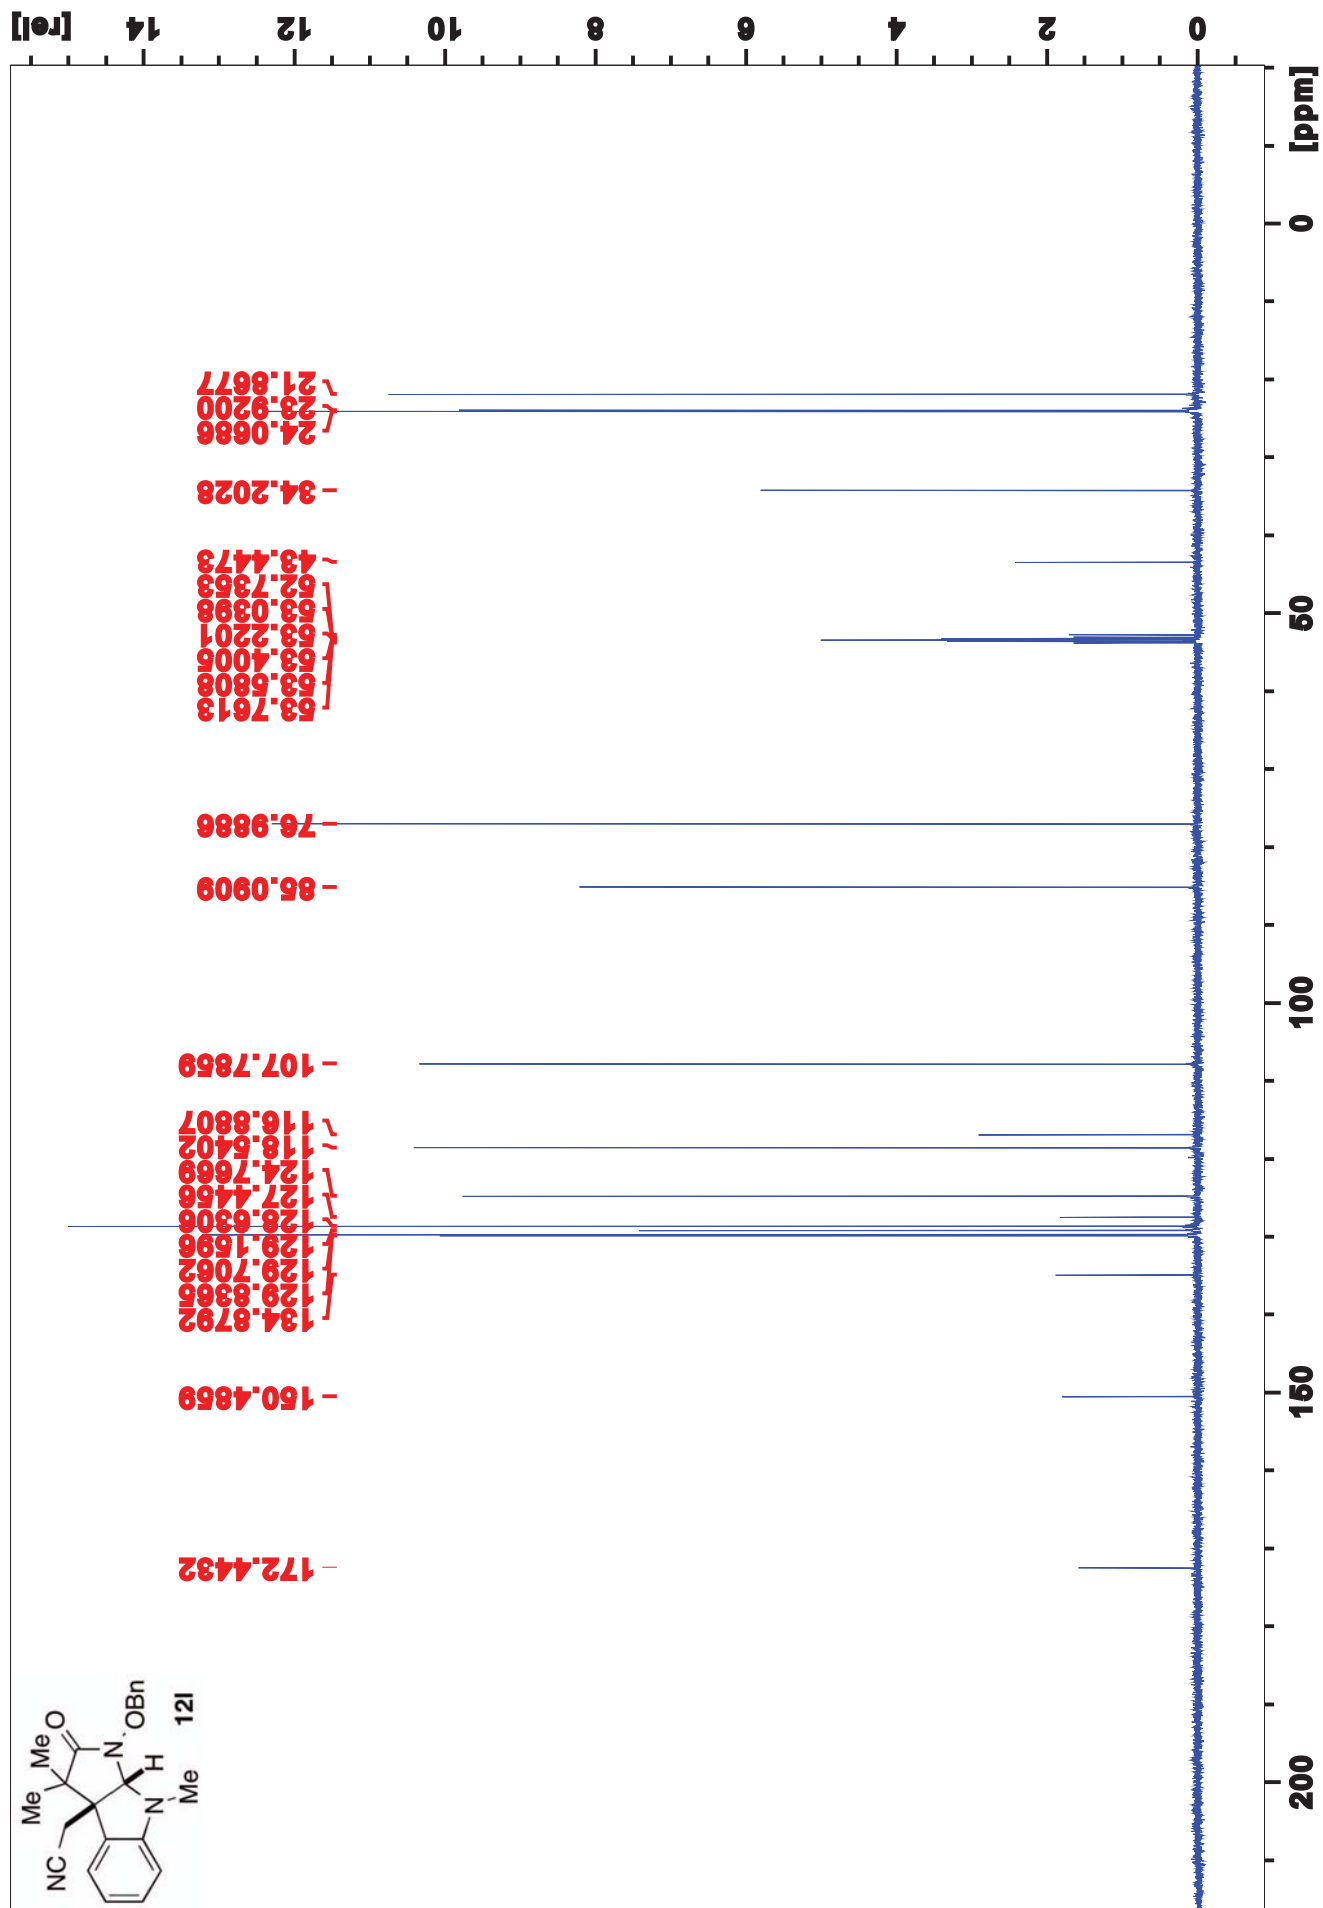

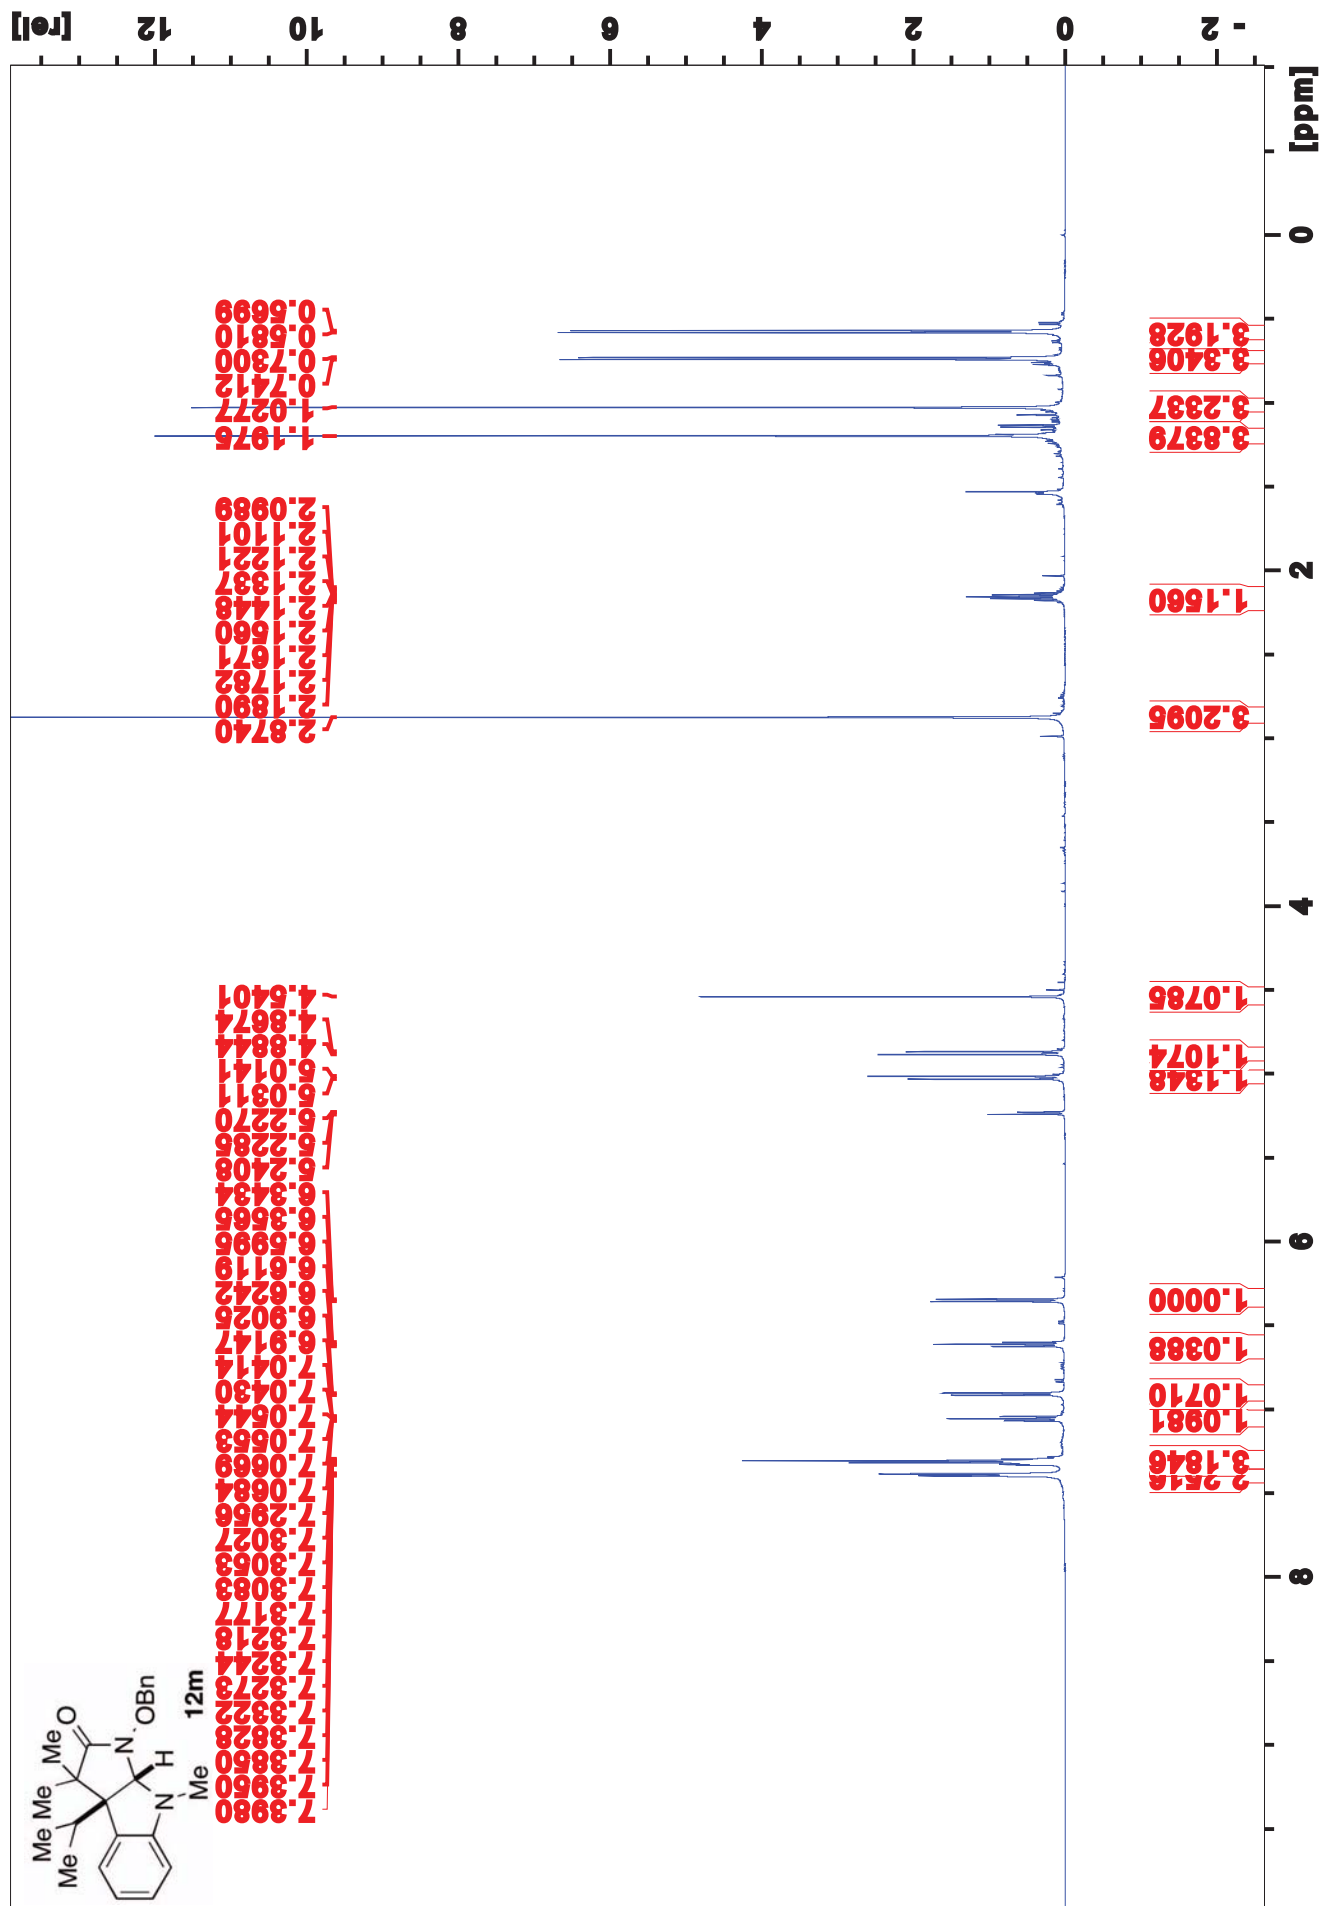

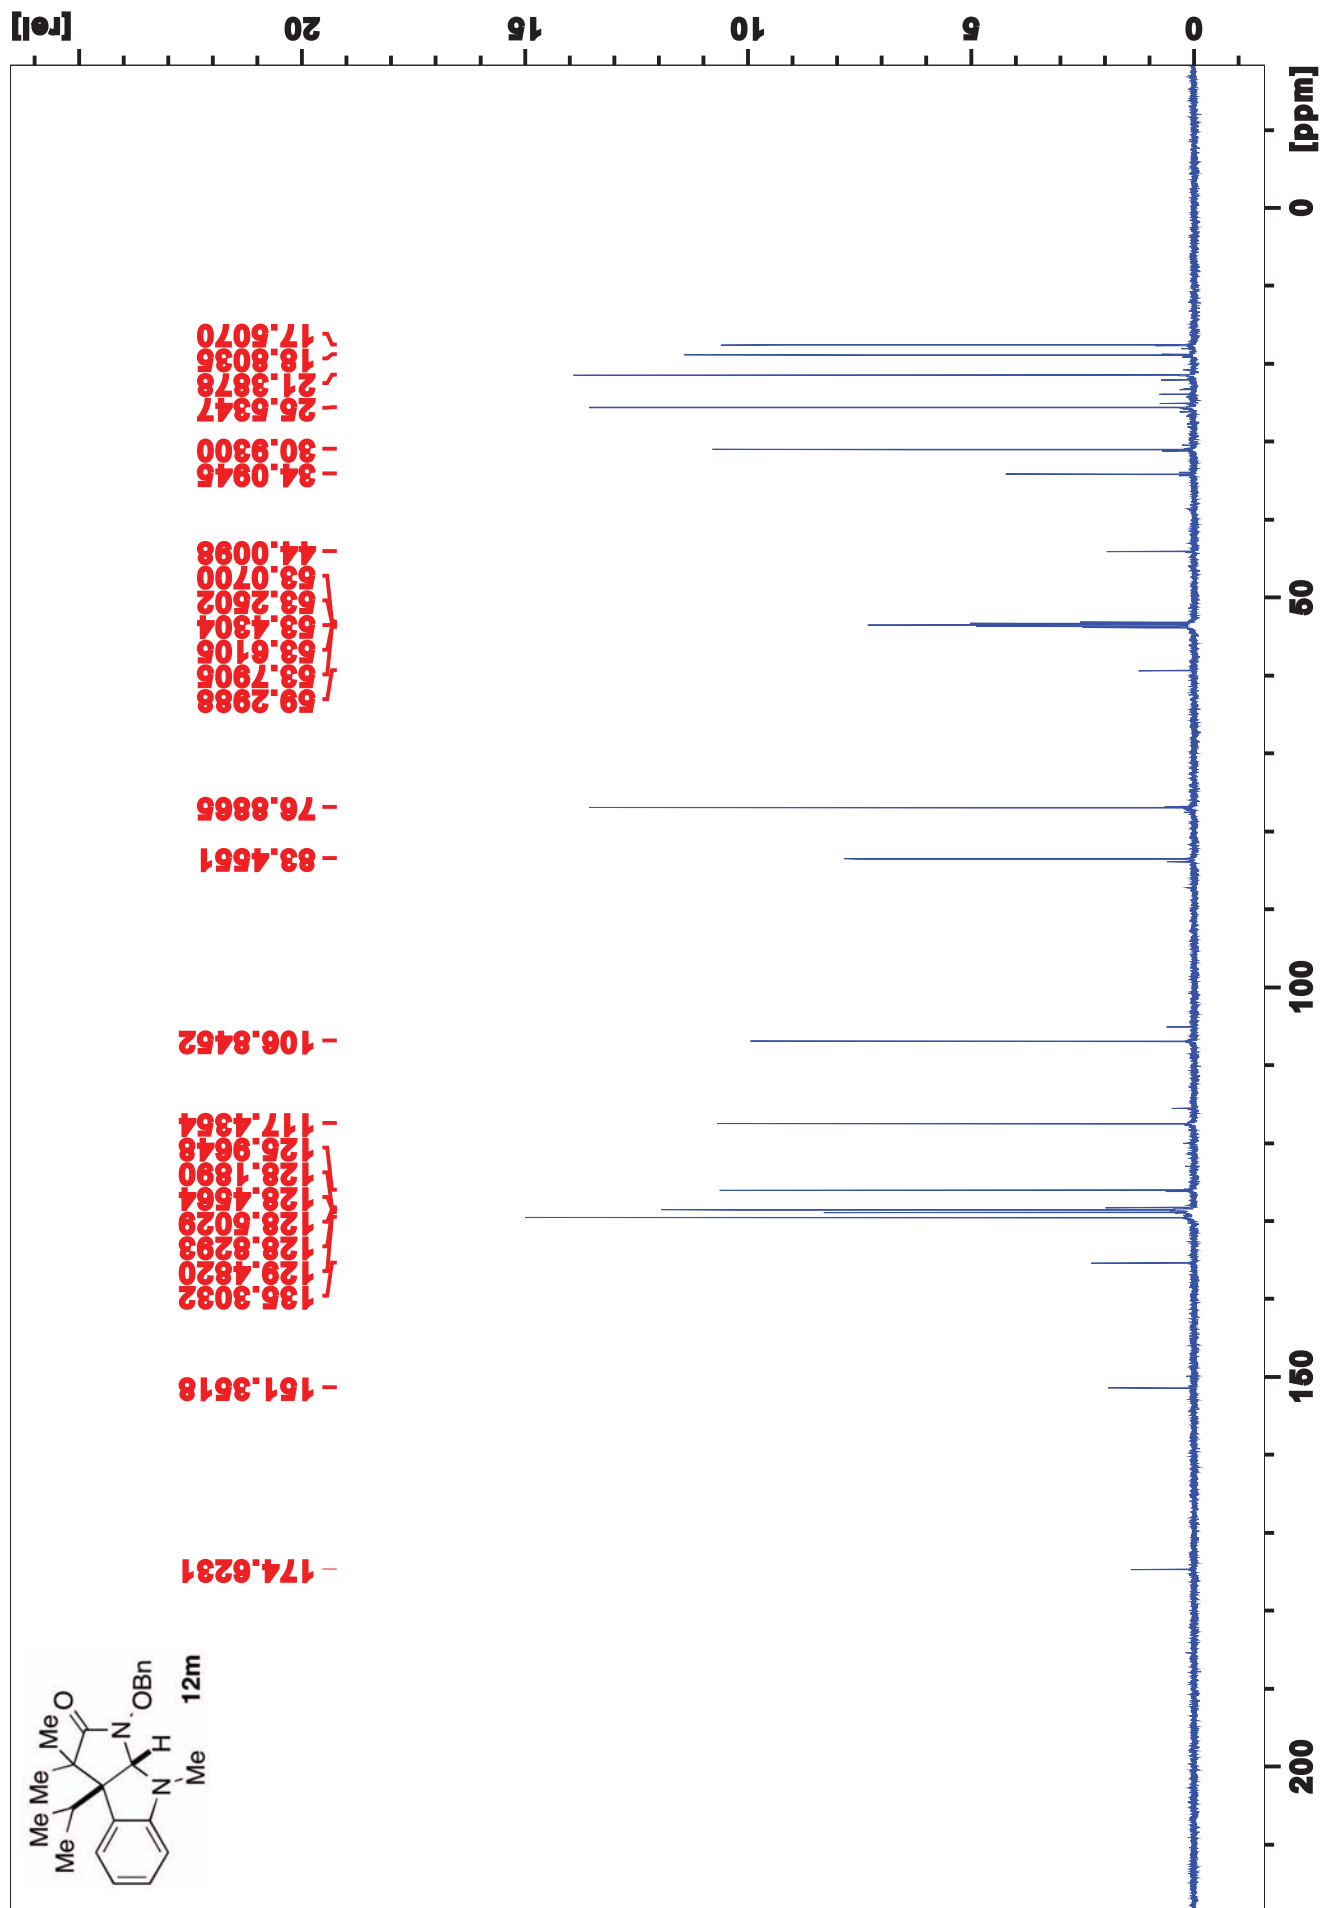



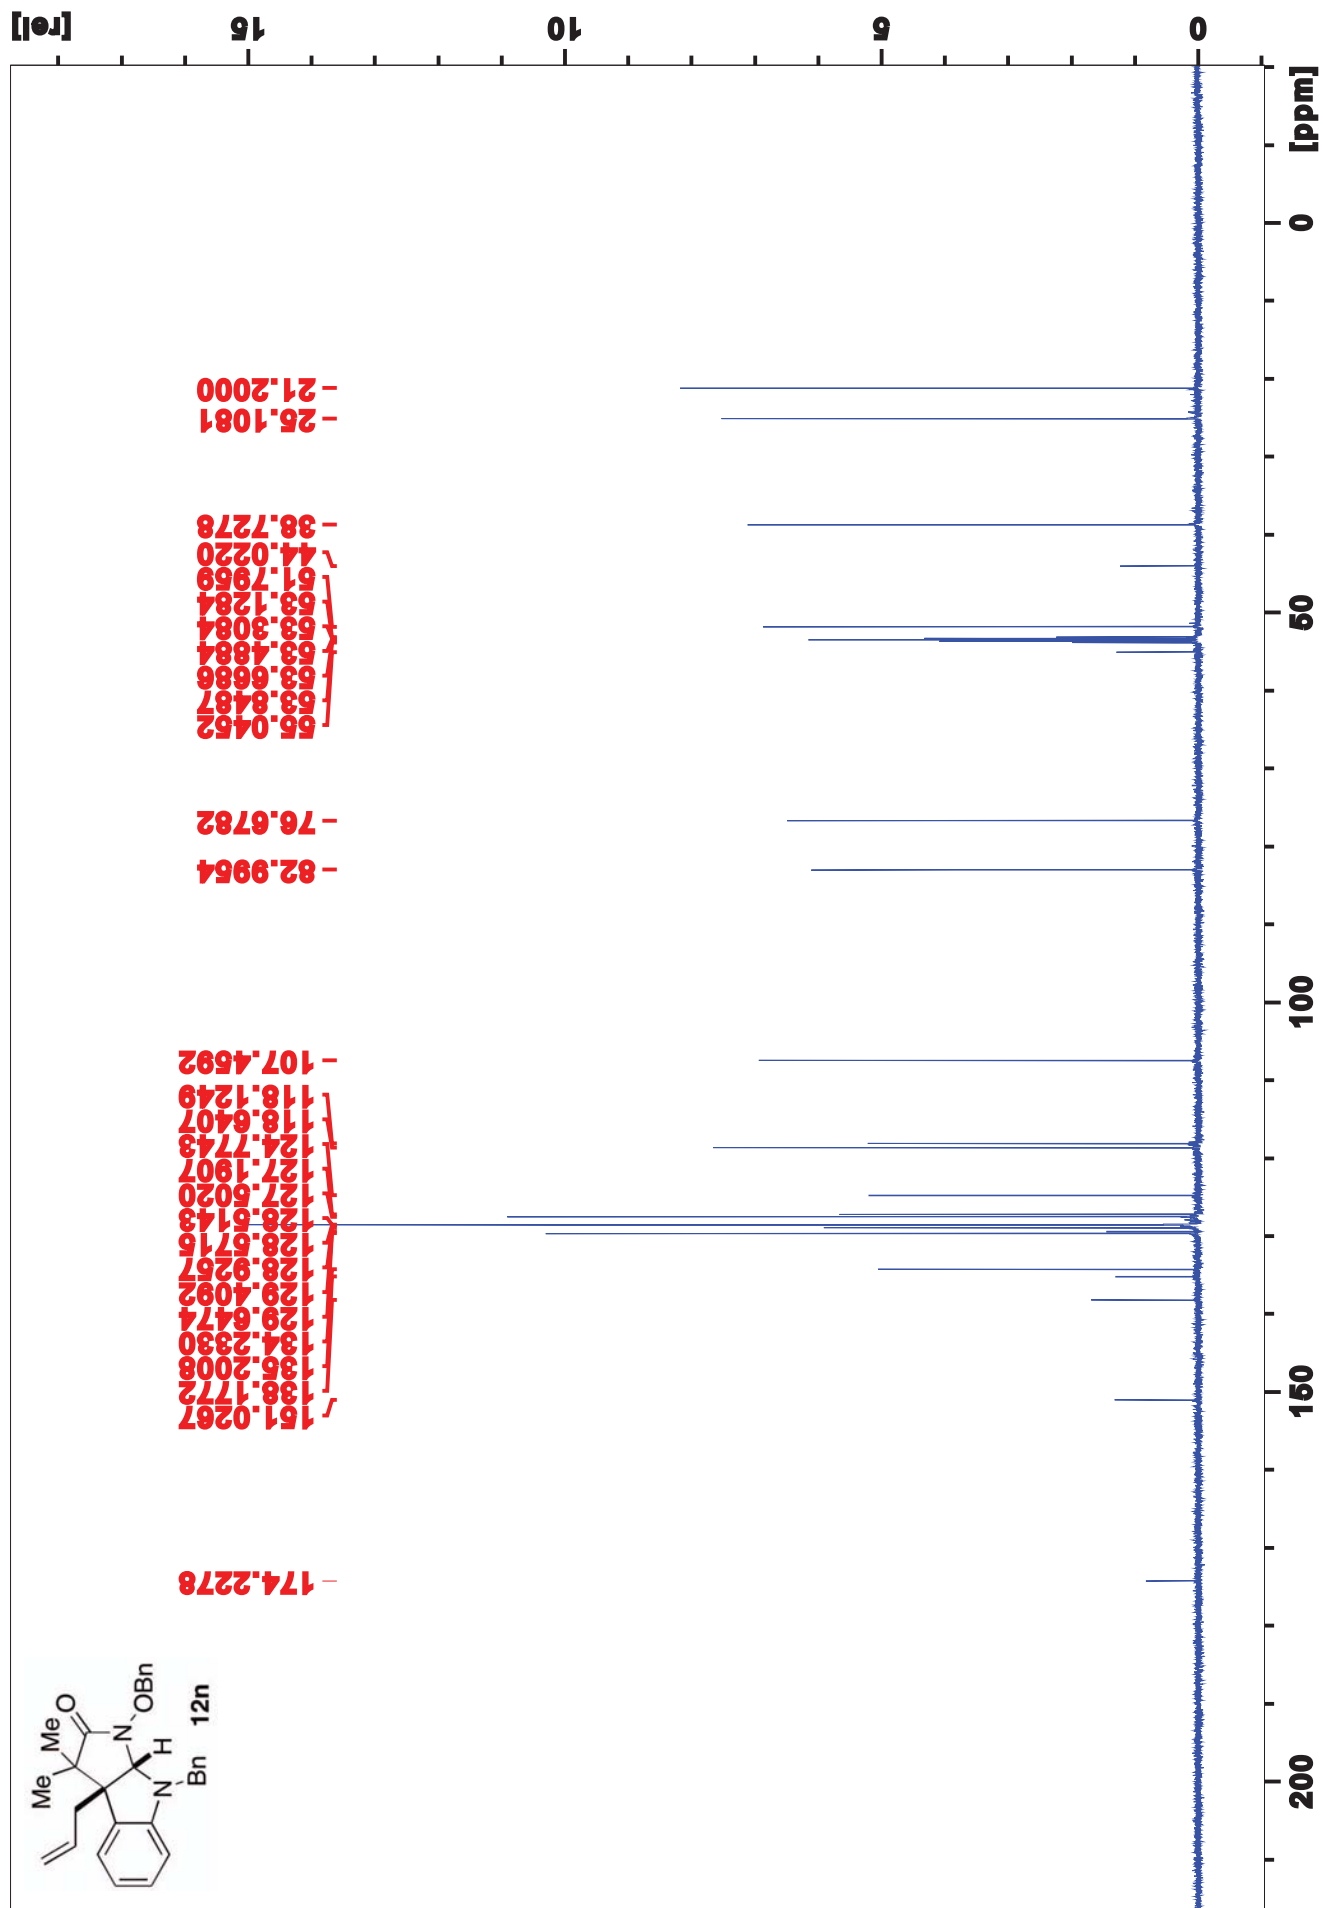



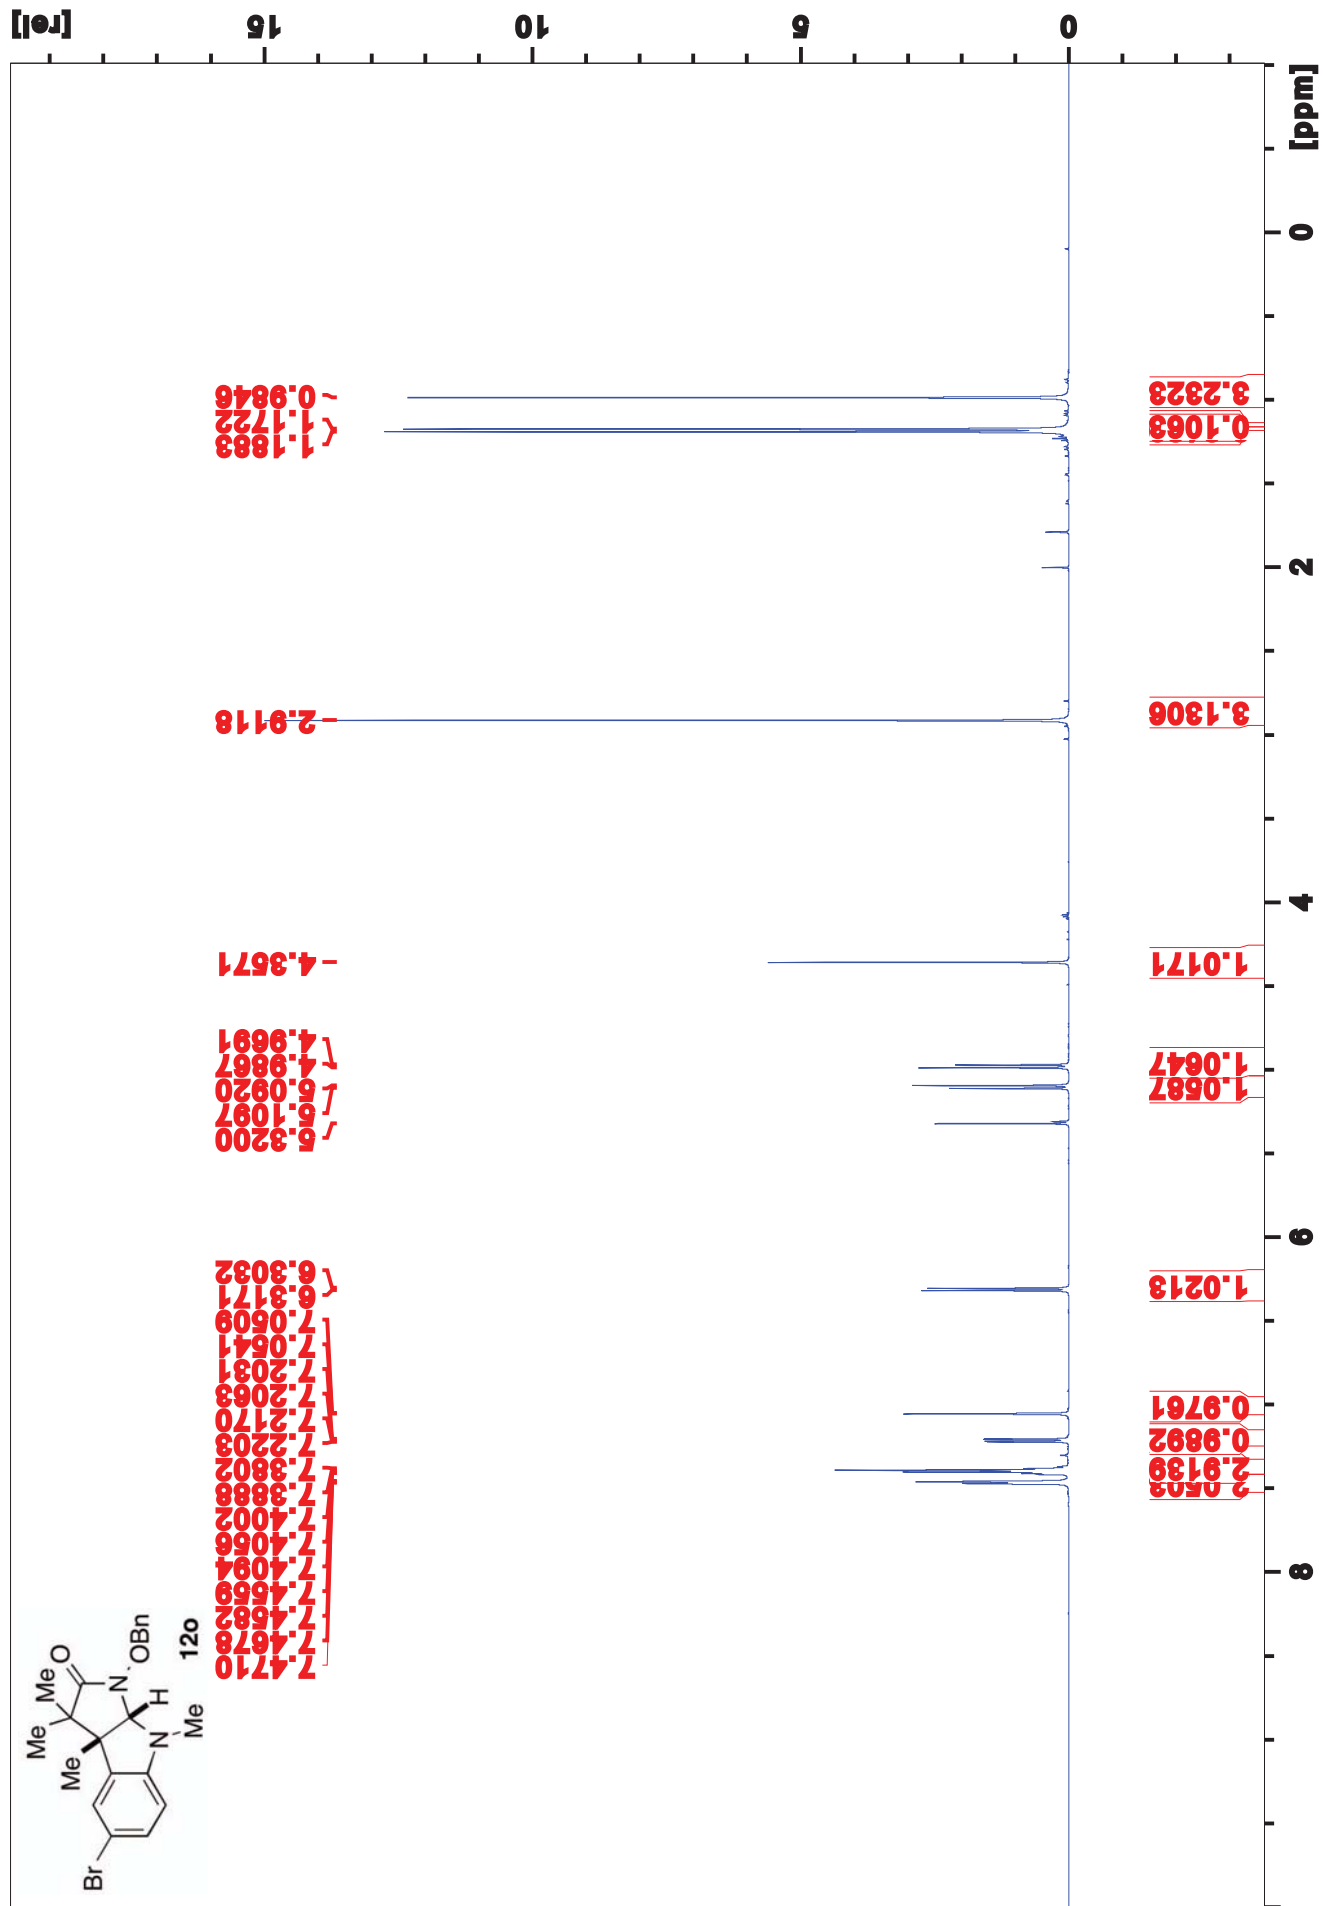

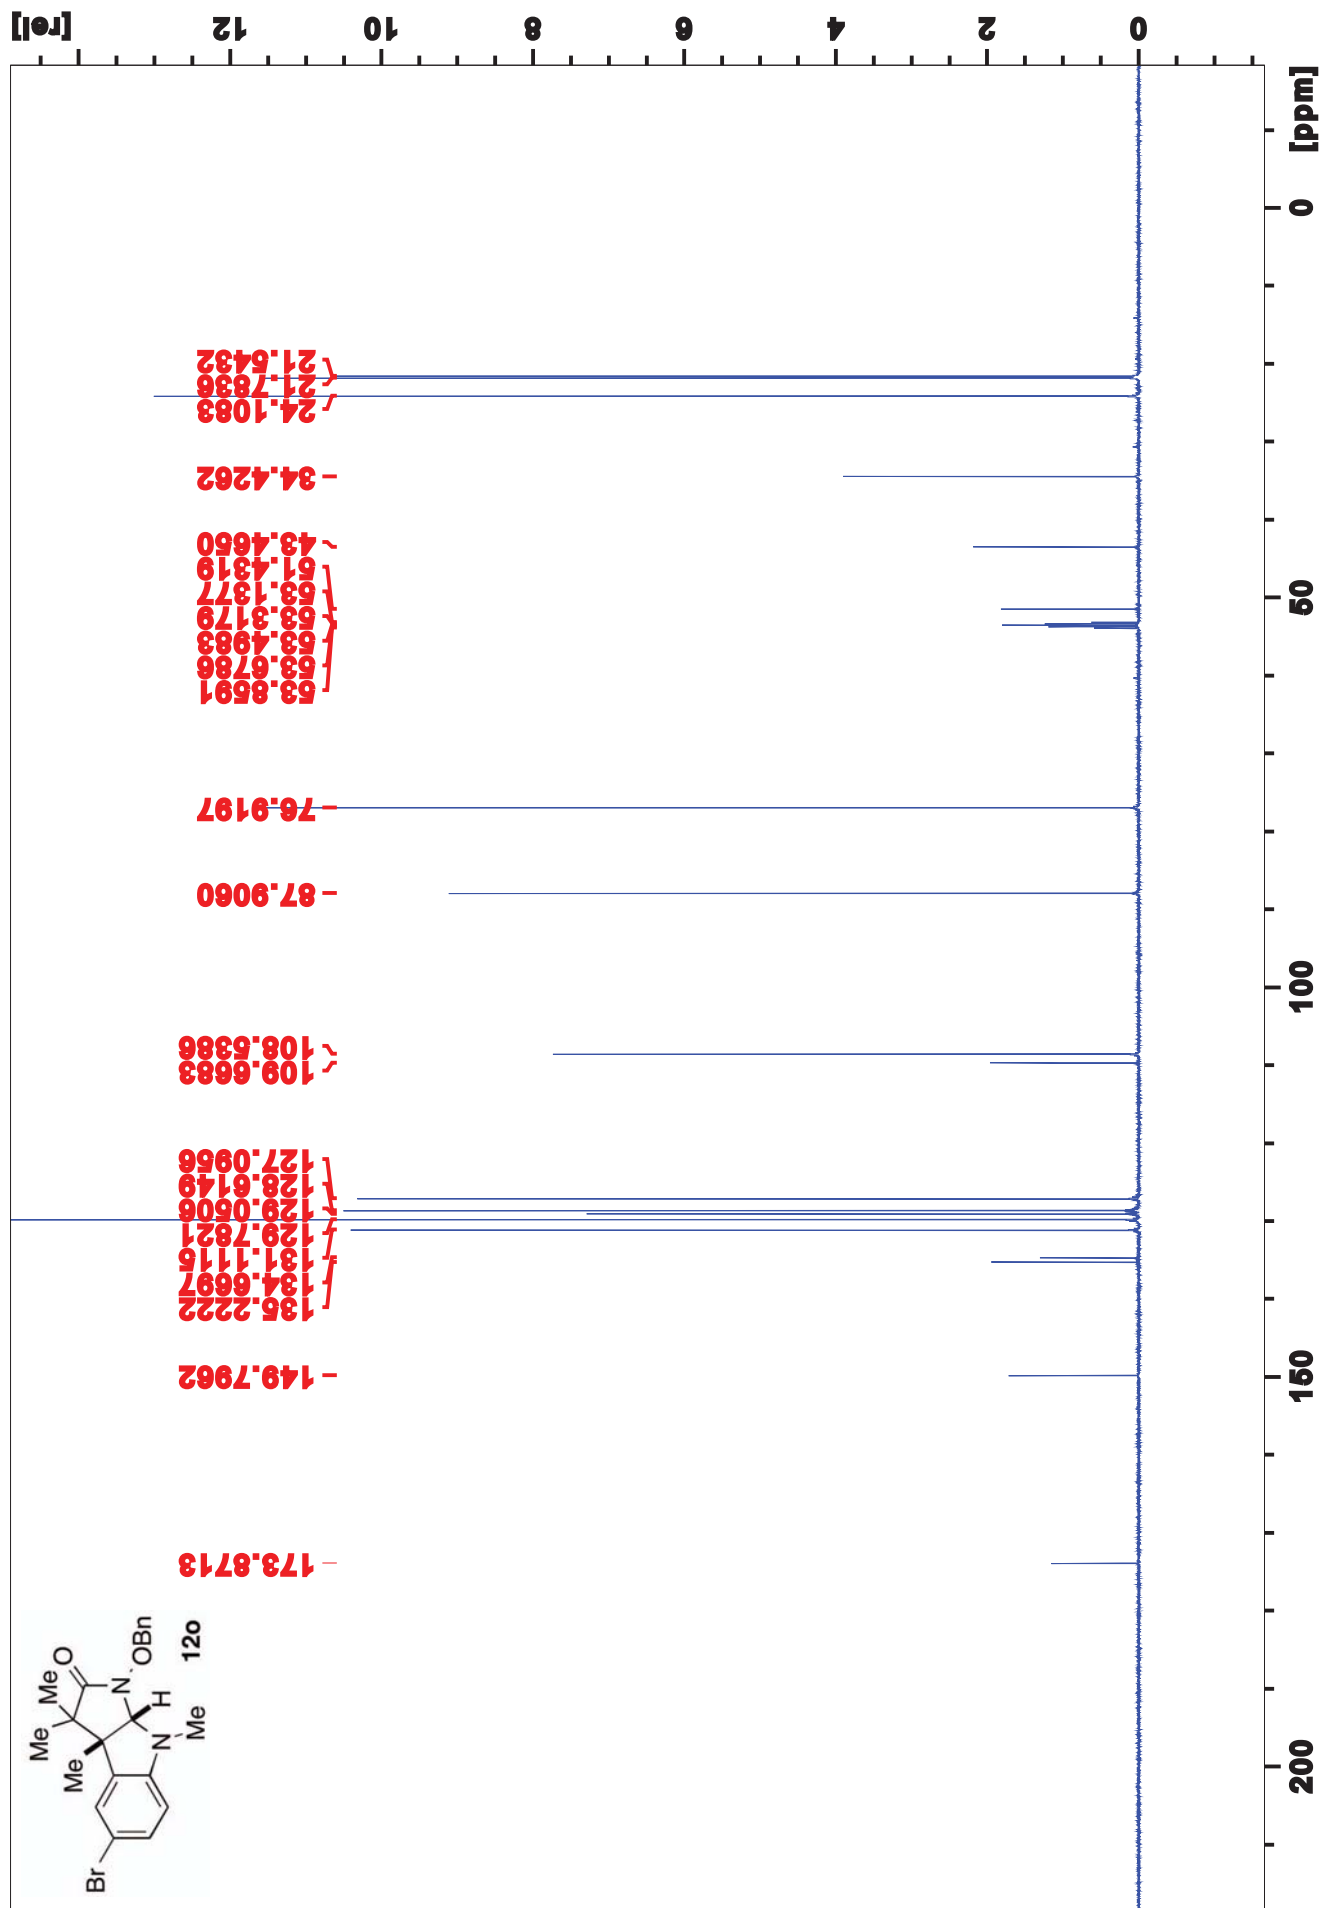

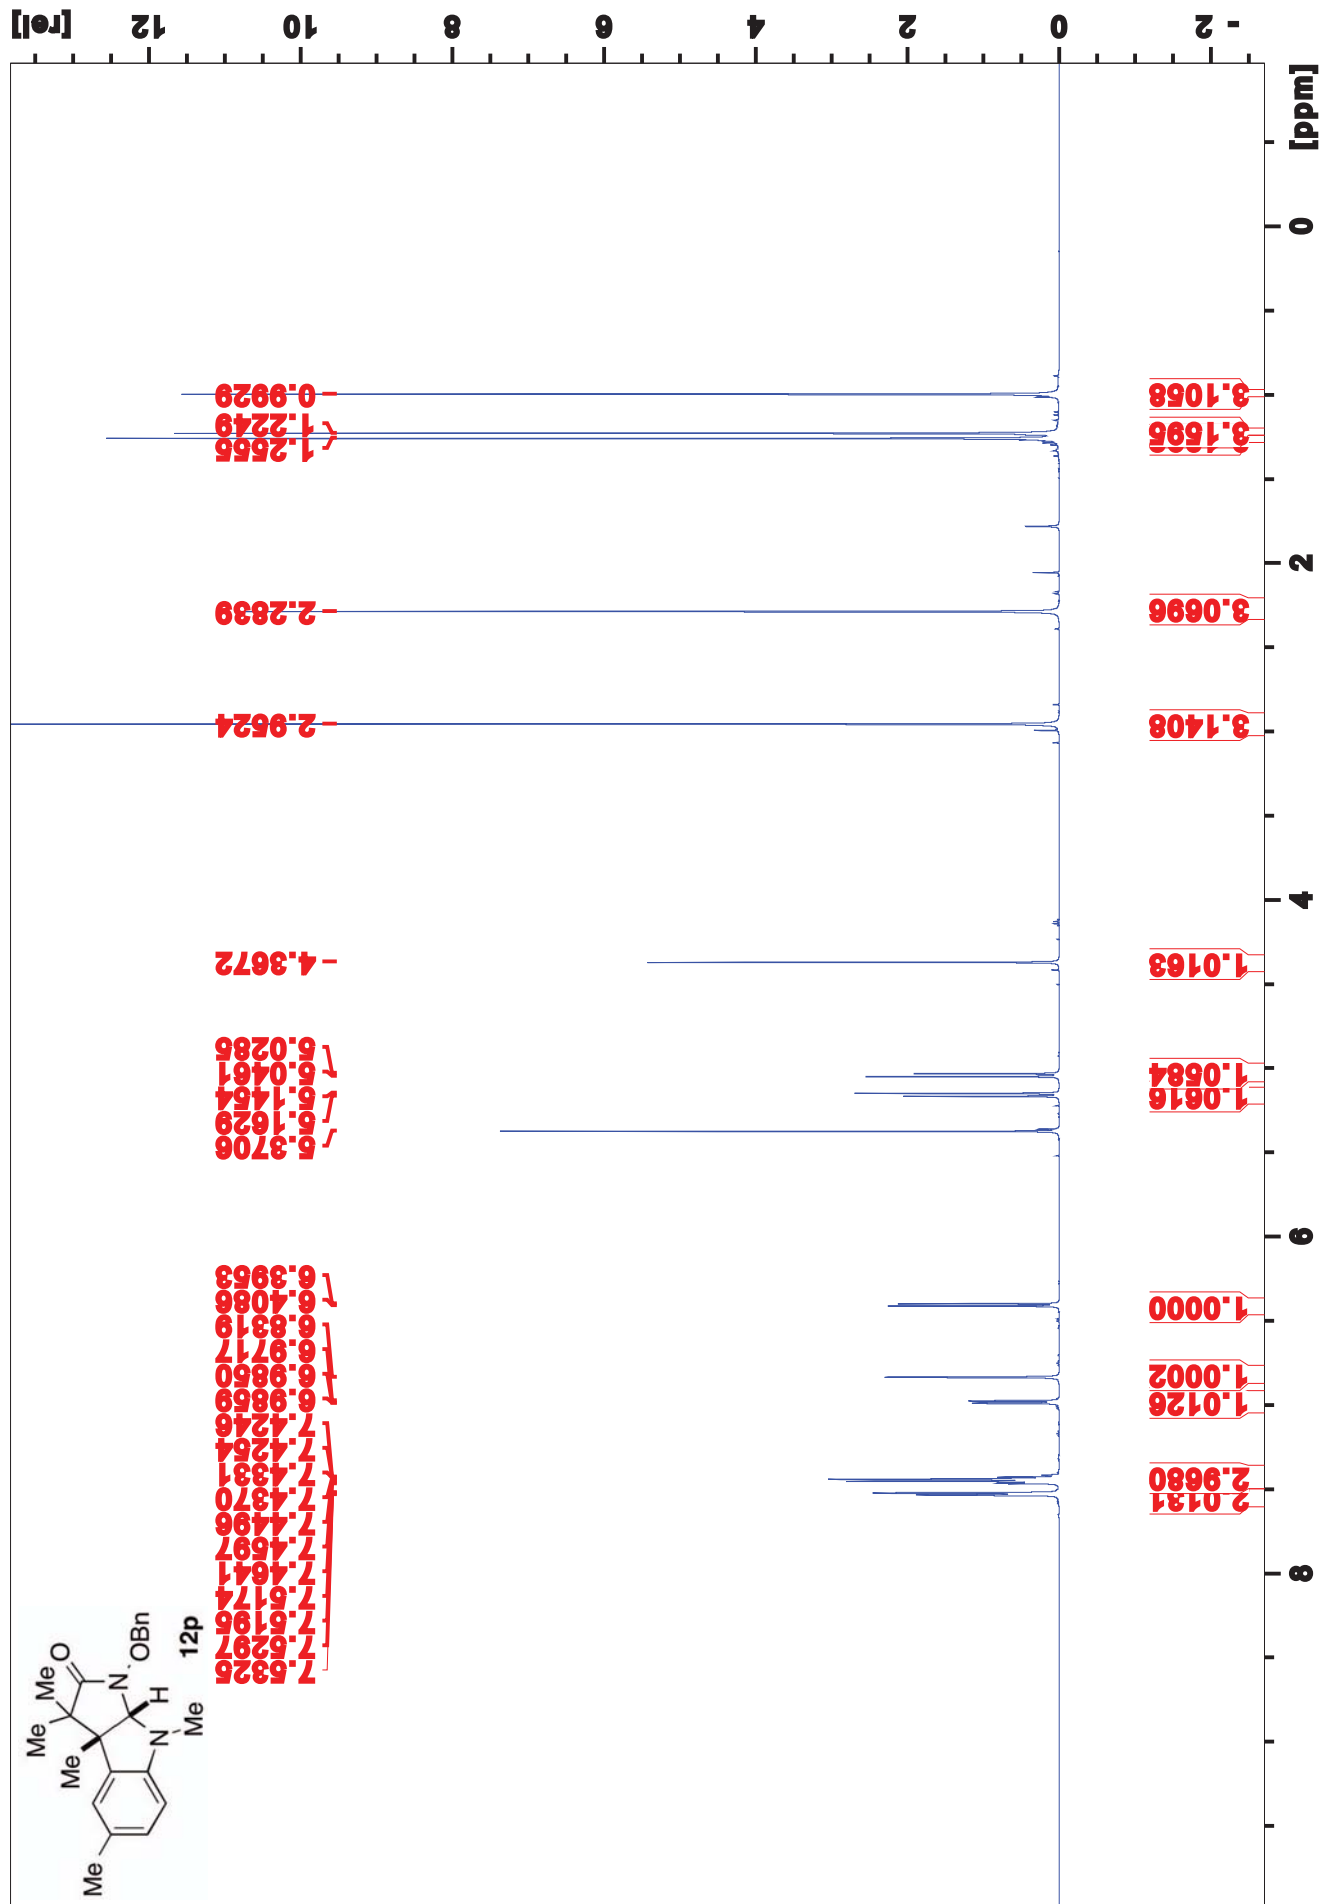

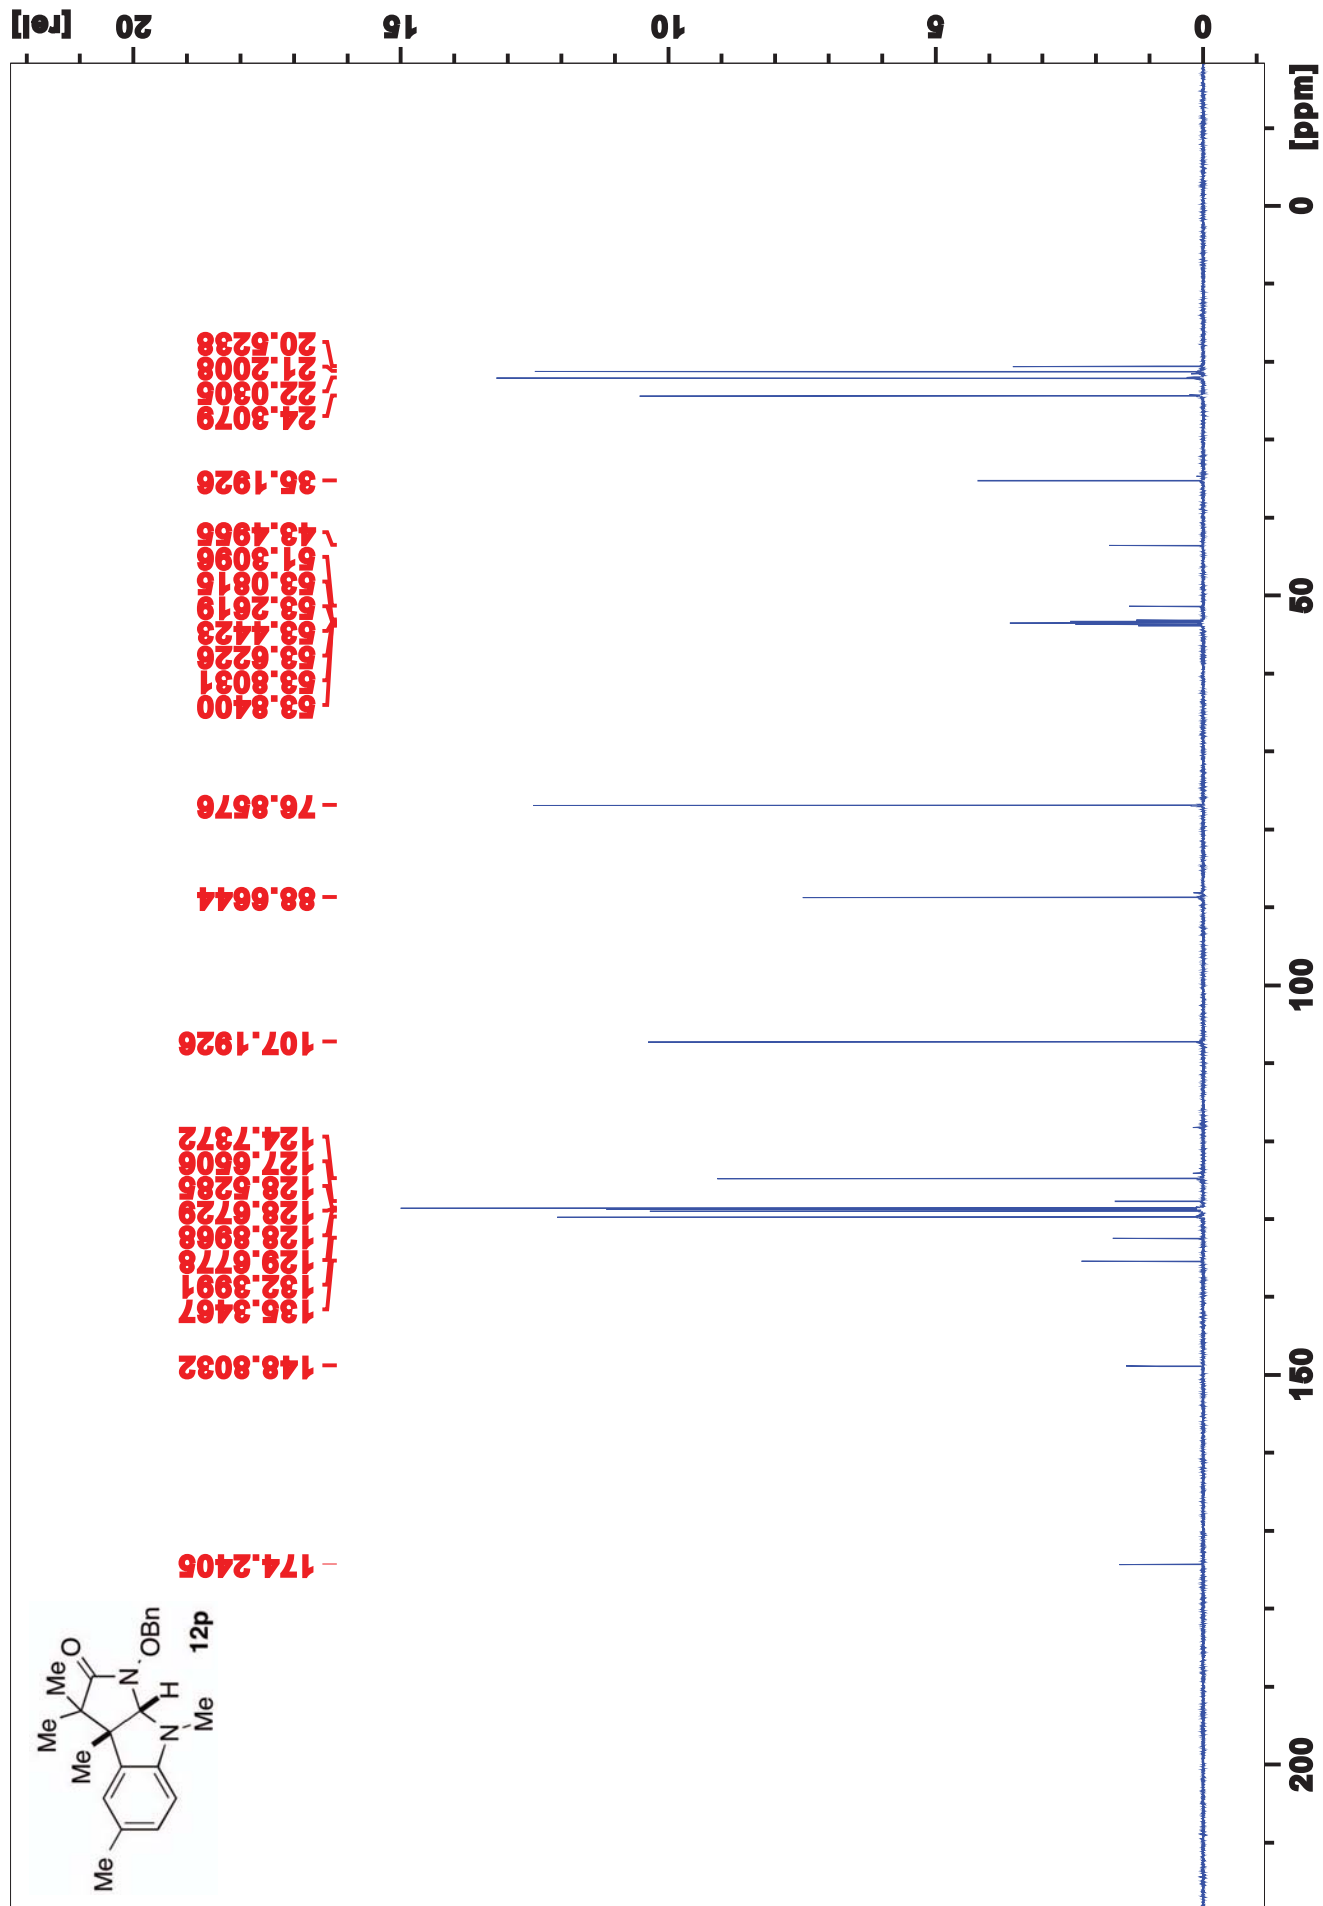

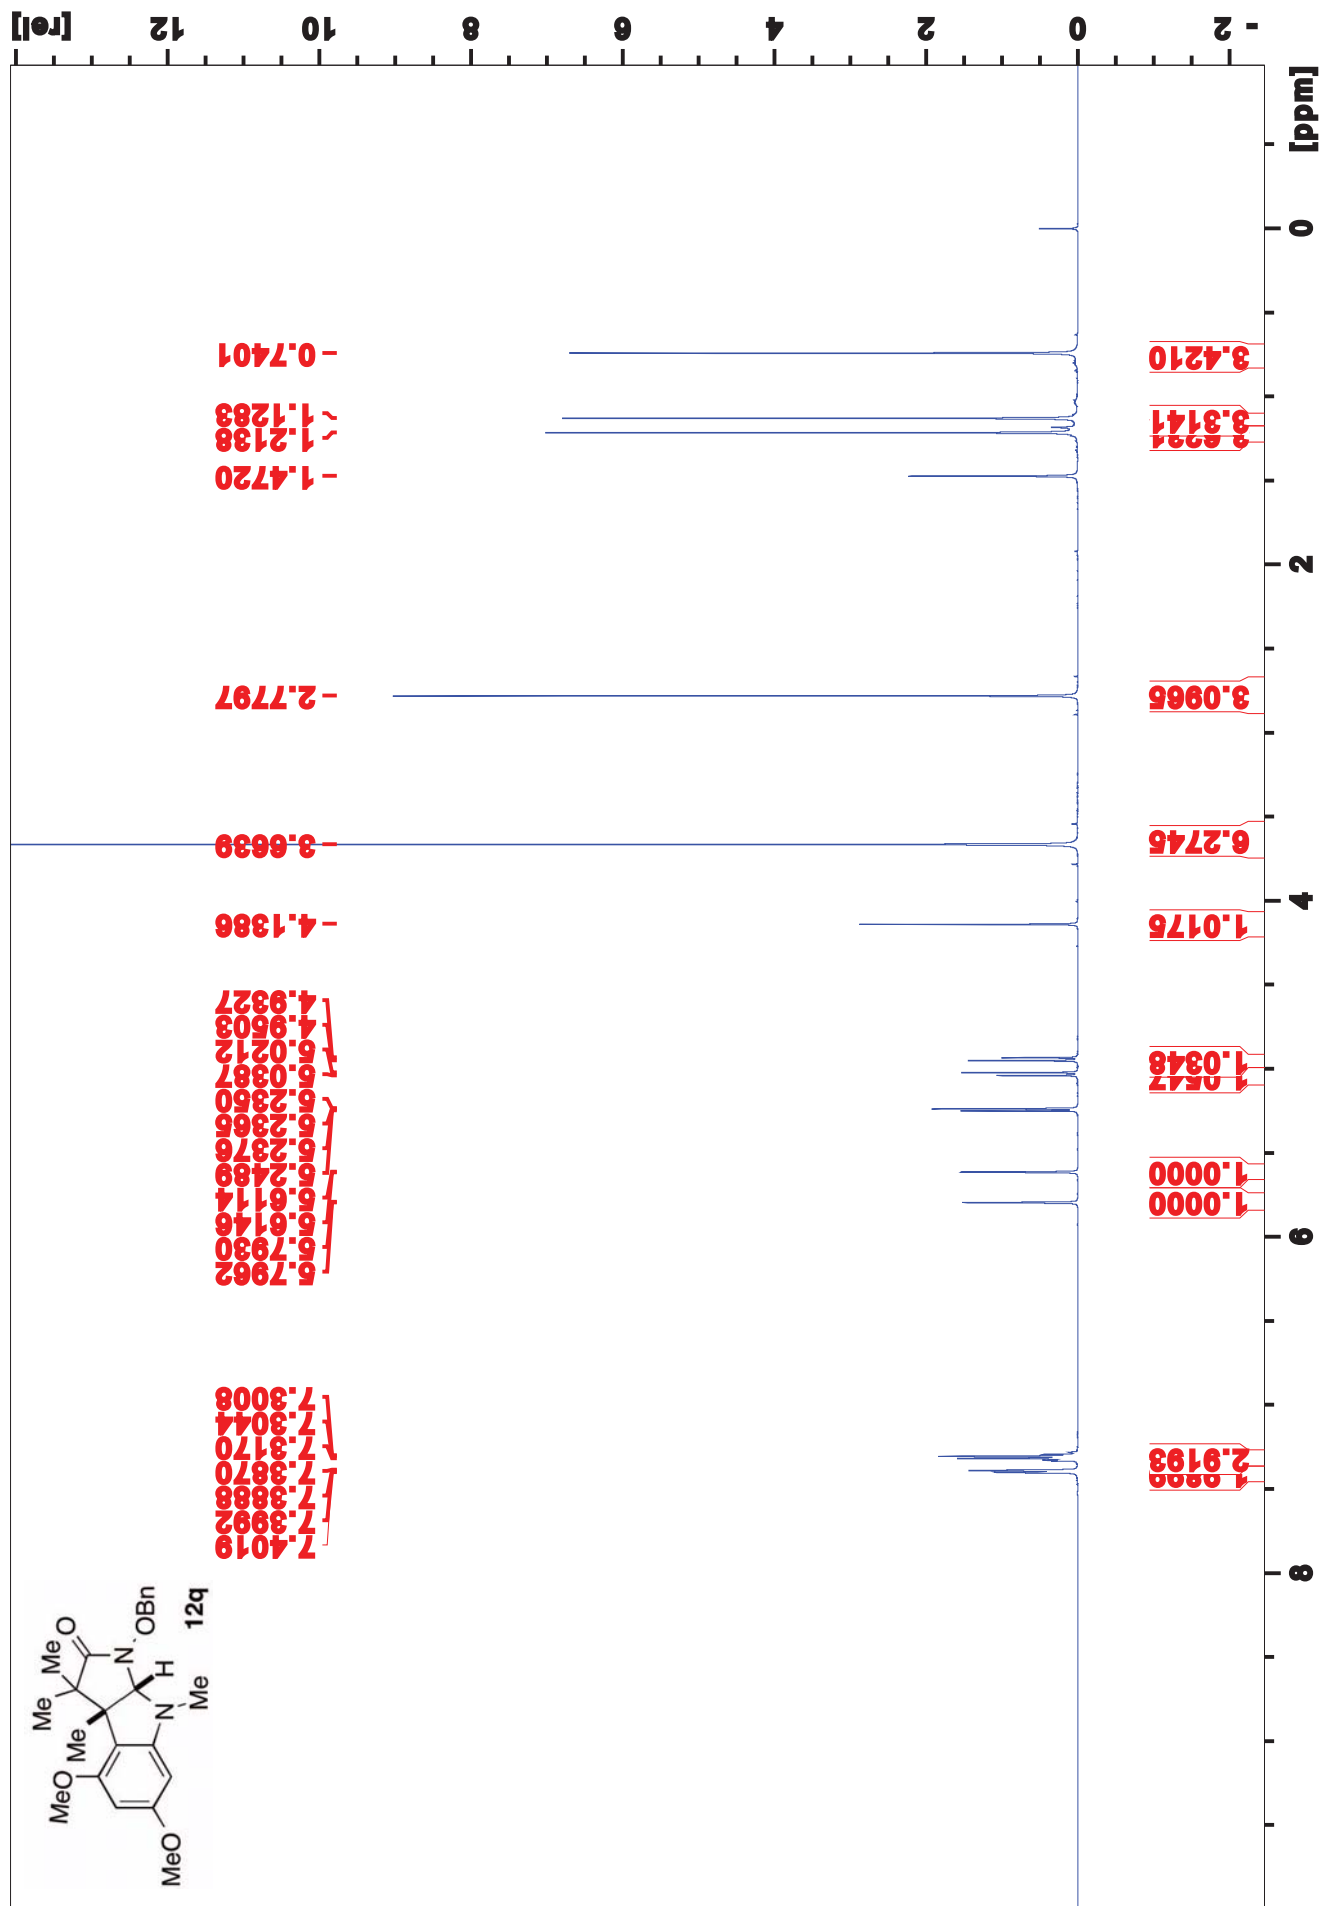

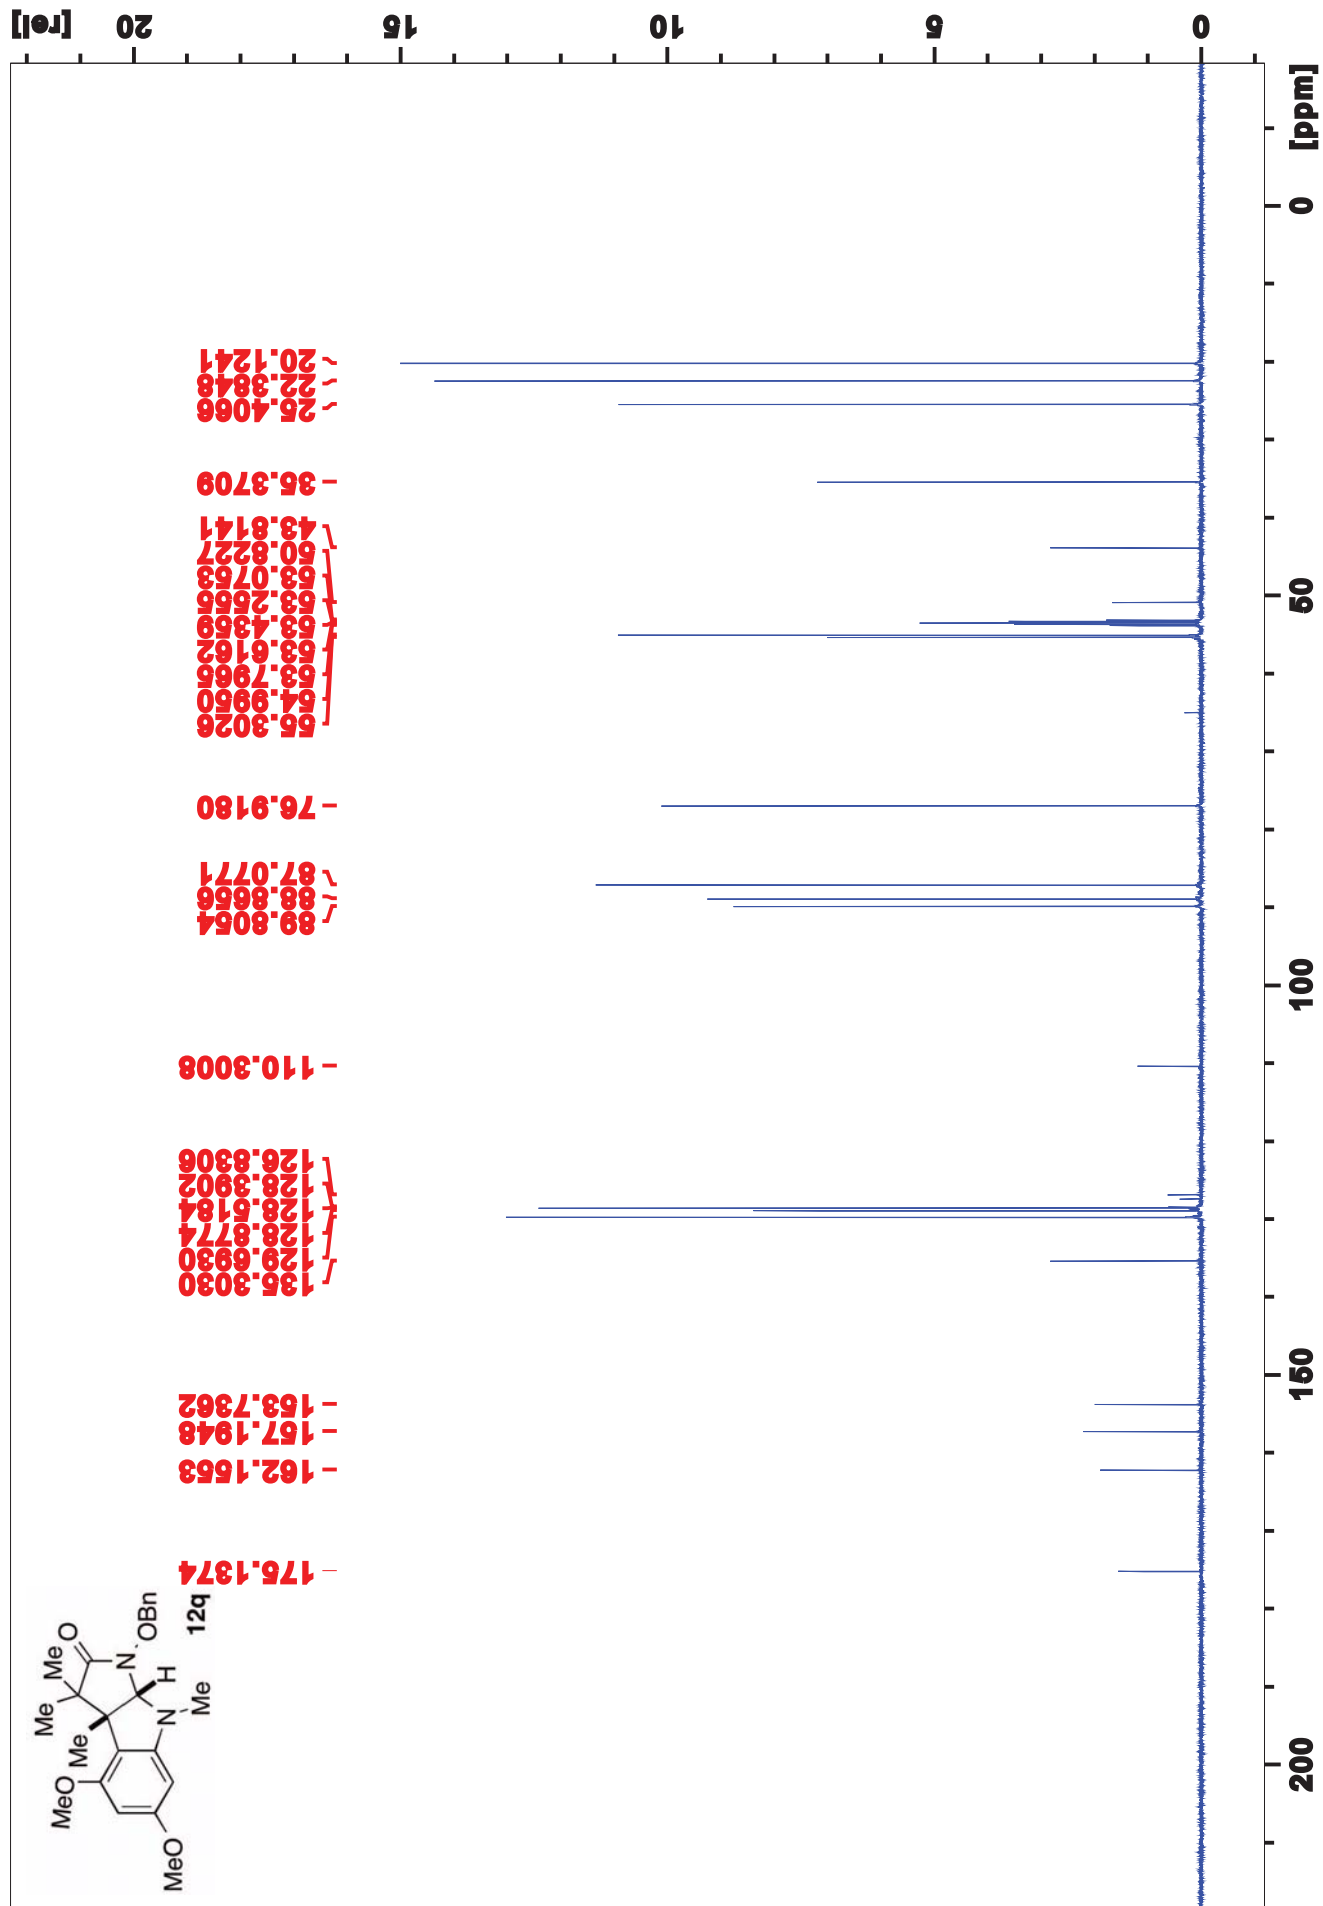



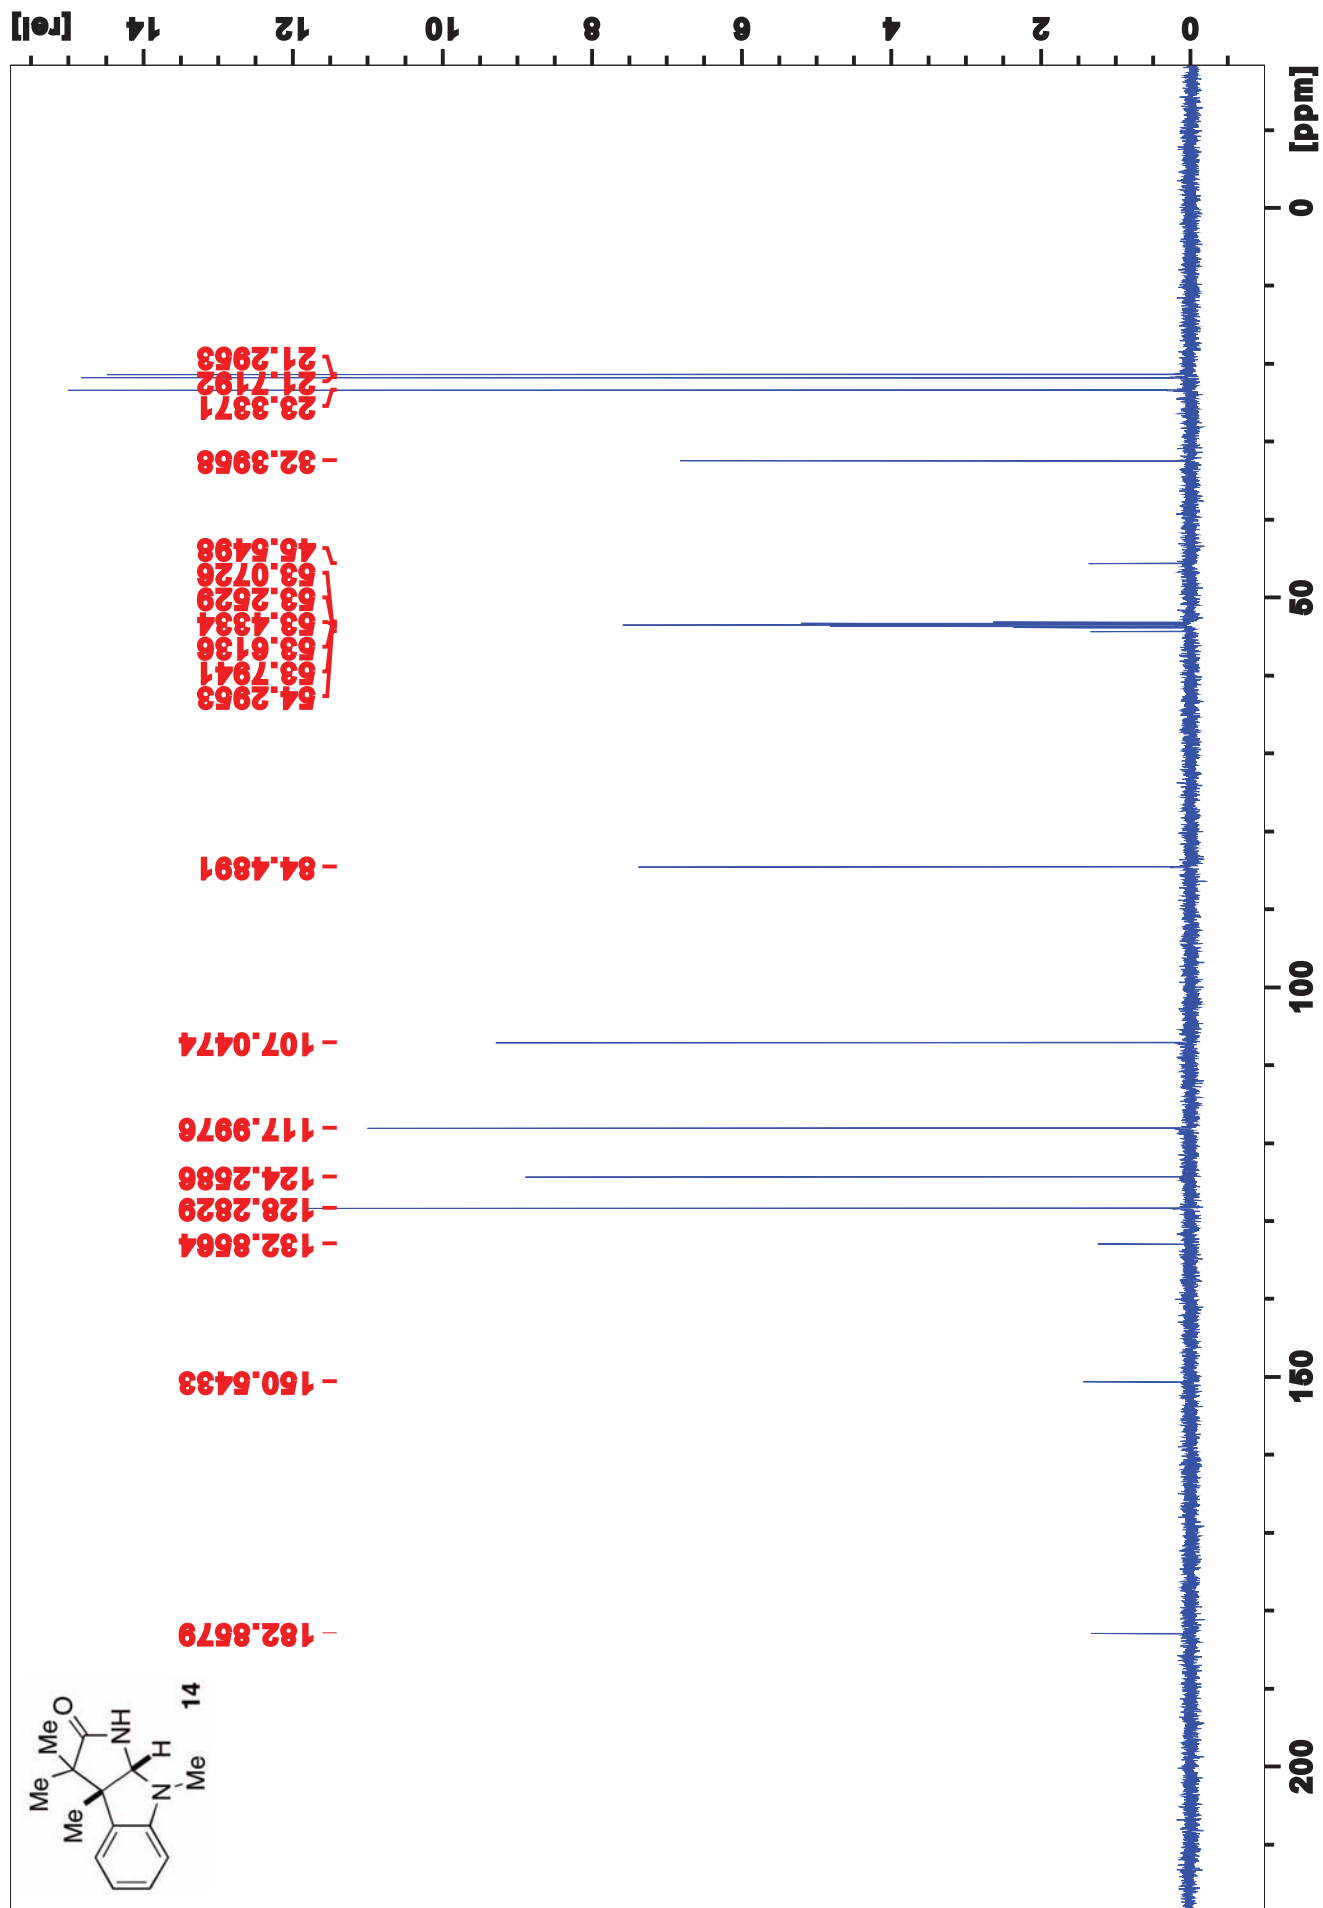



"MCD-06-041\_proton" 10 1 "/Users/mariacdipoto/Desktop/(3+2) Cycloaddition Reactions NMR"

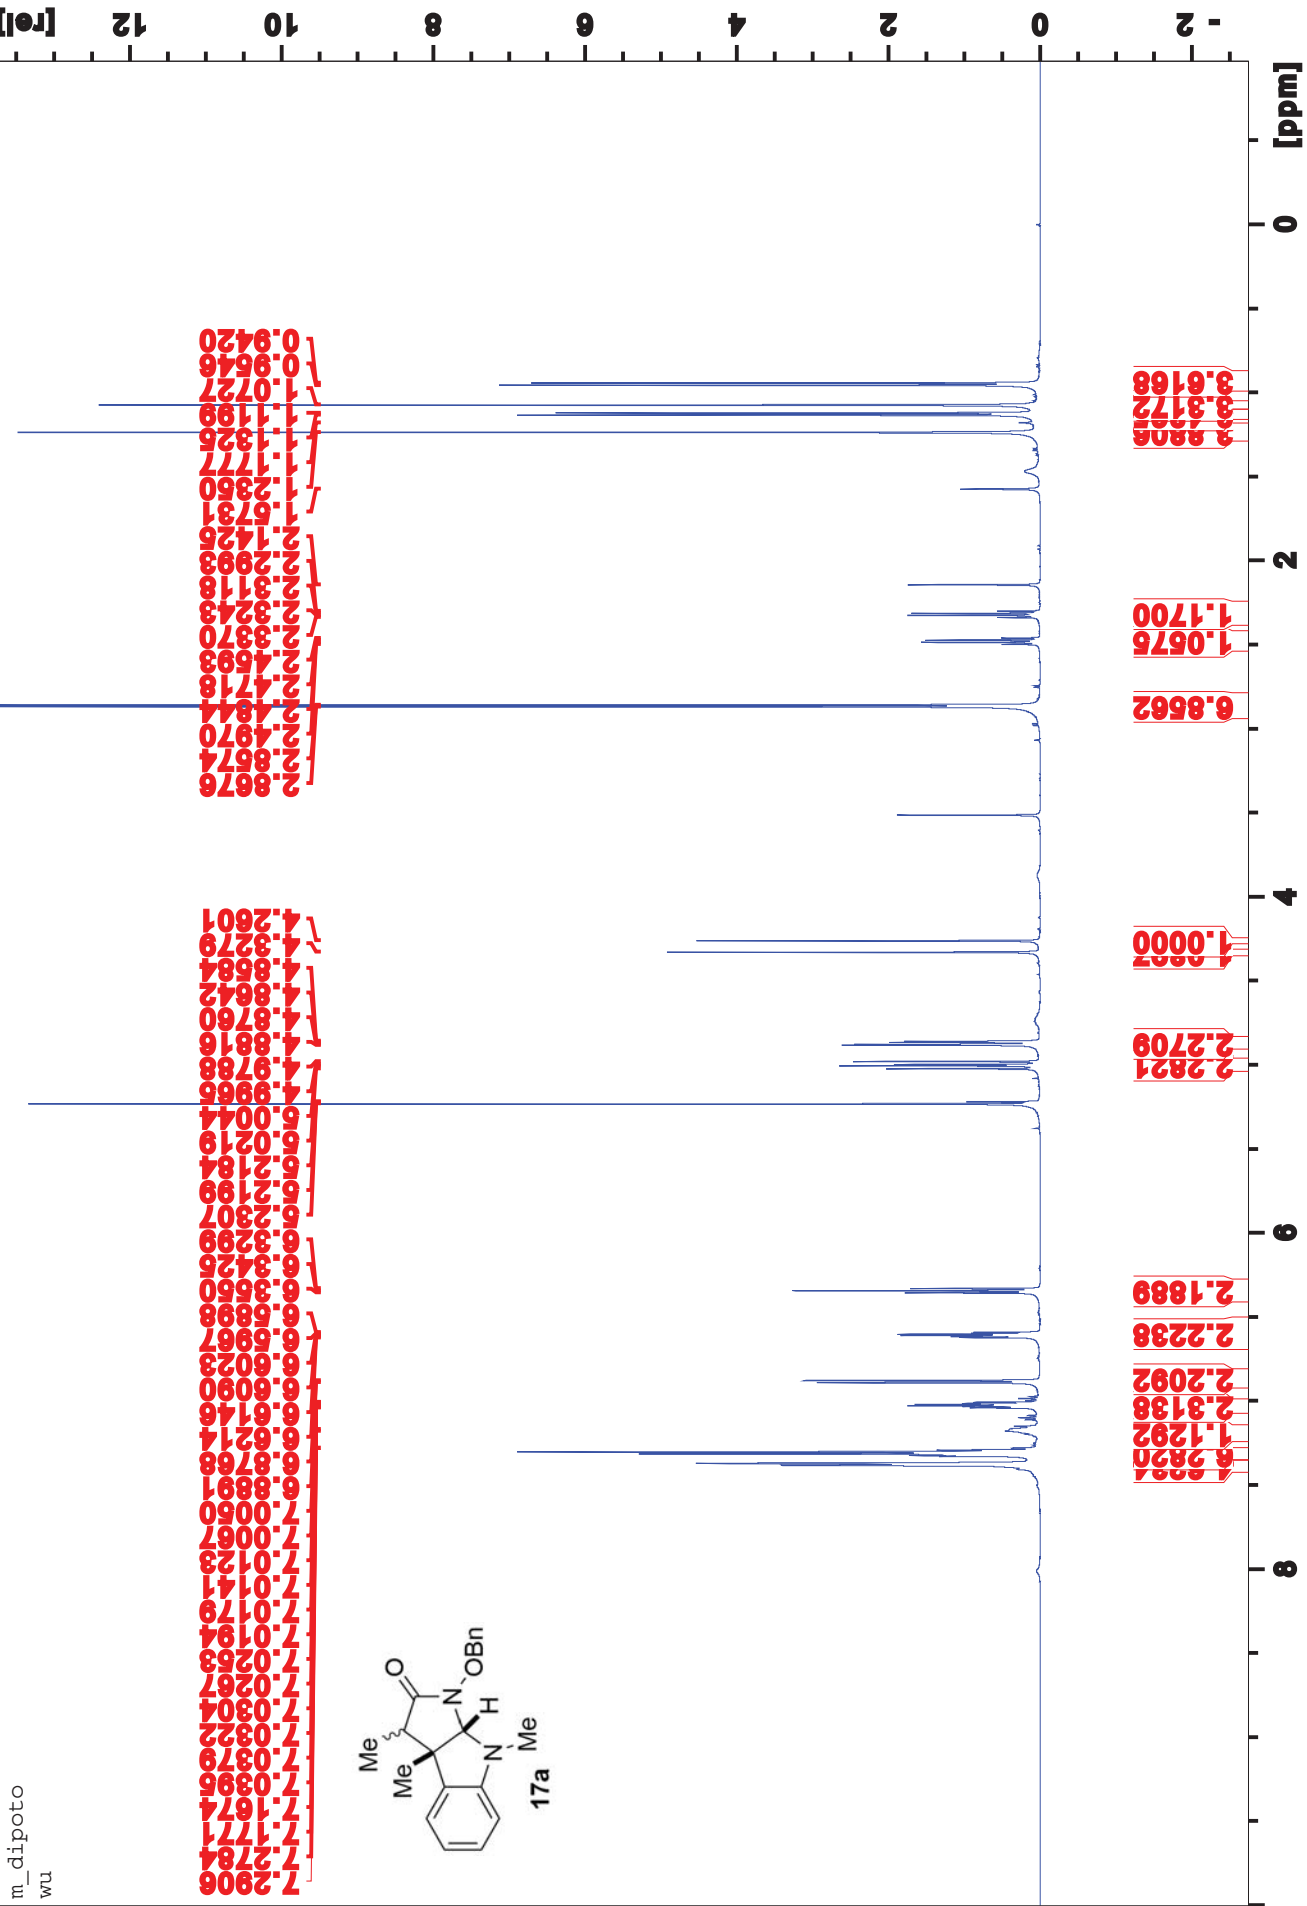

"MCD-06-041 carbon" 11 1 "/Users/mariacdipoto/Desktop/(3+2) Cycloaddition Reactions NMR"

m\_dipoto  
wu

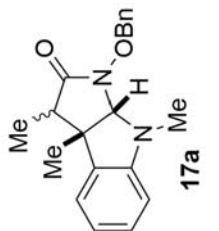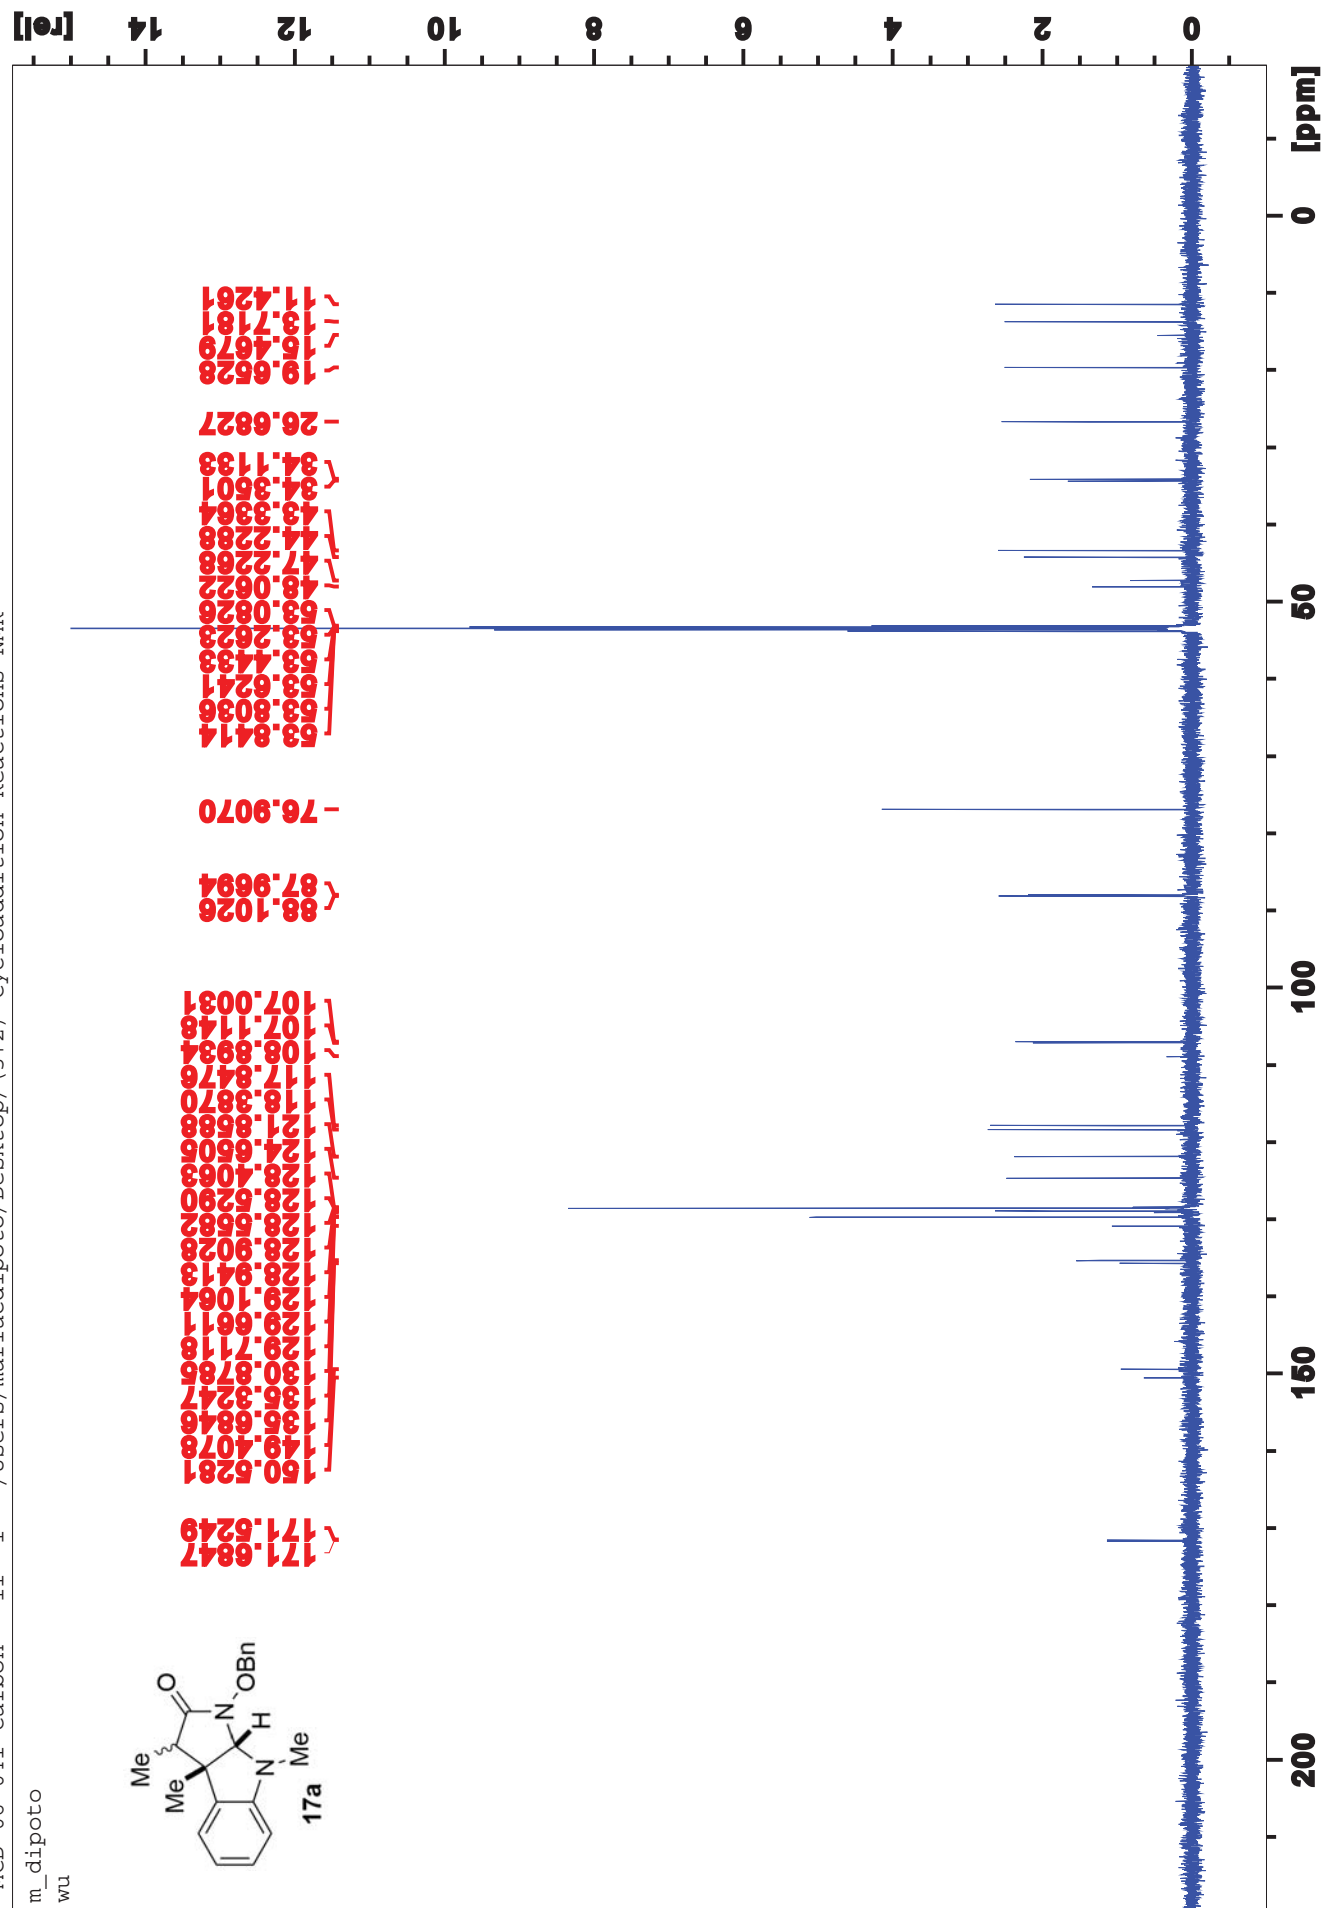

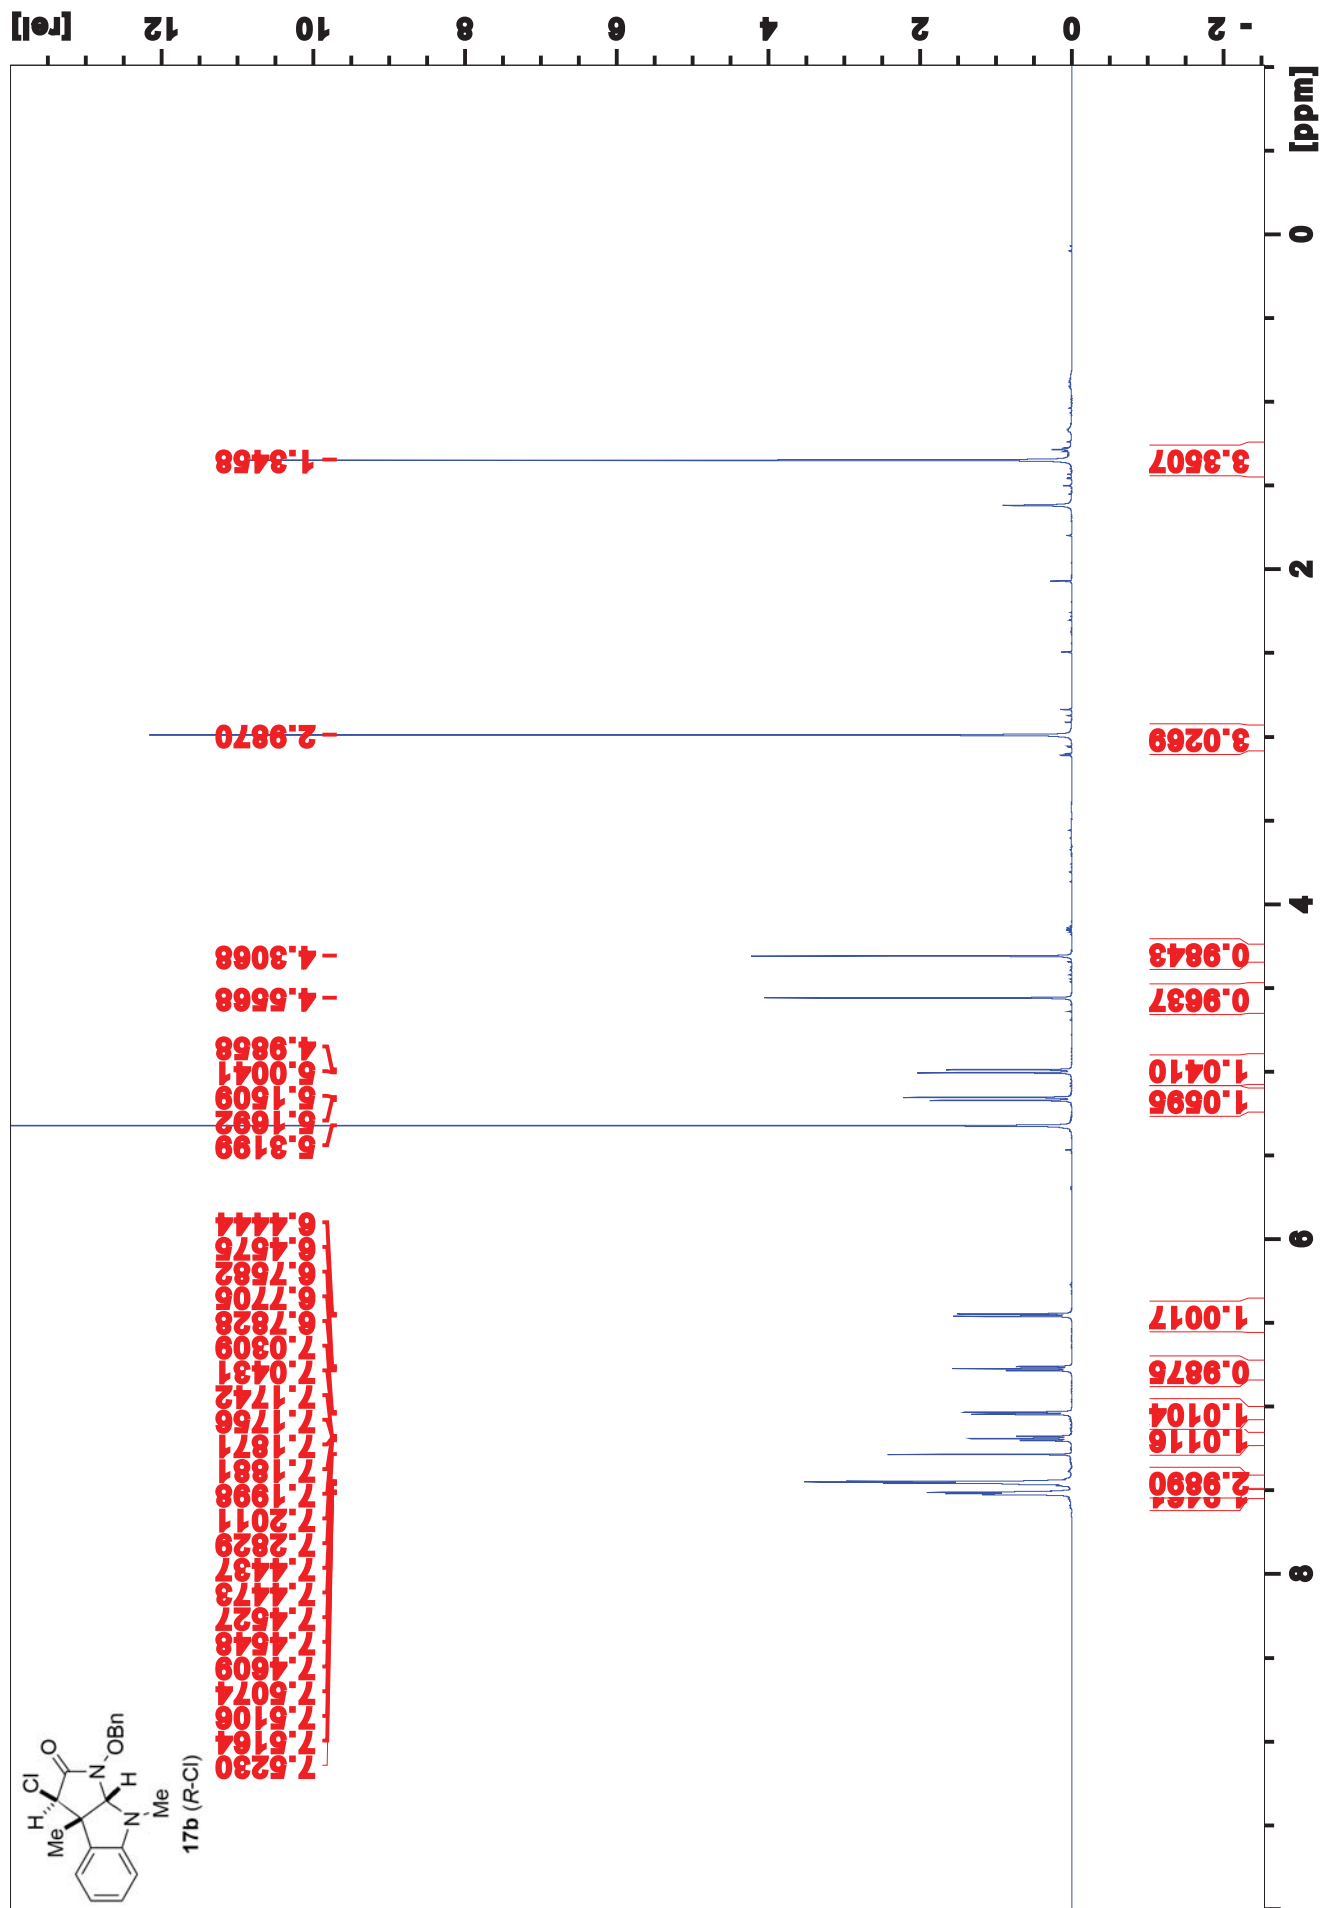

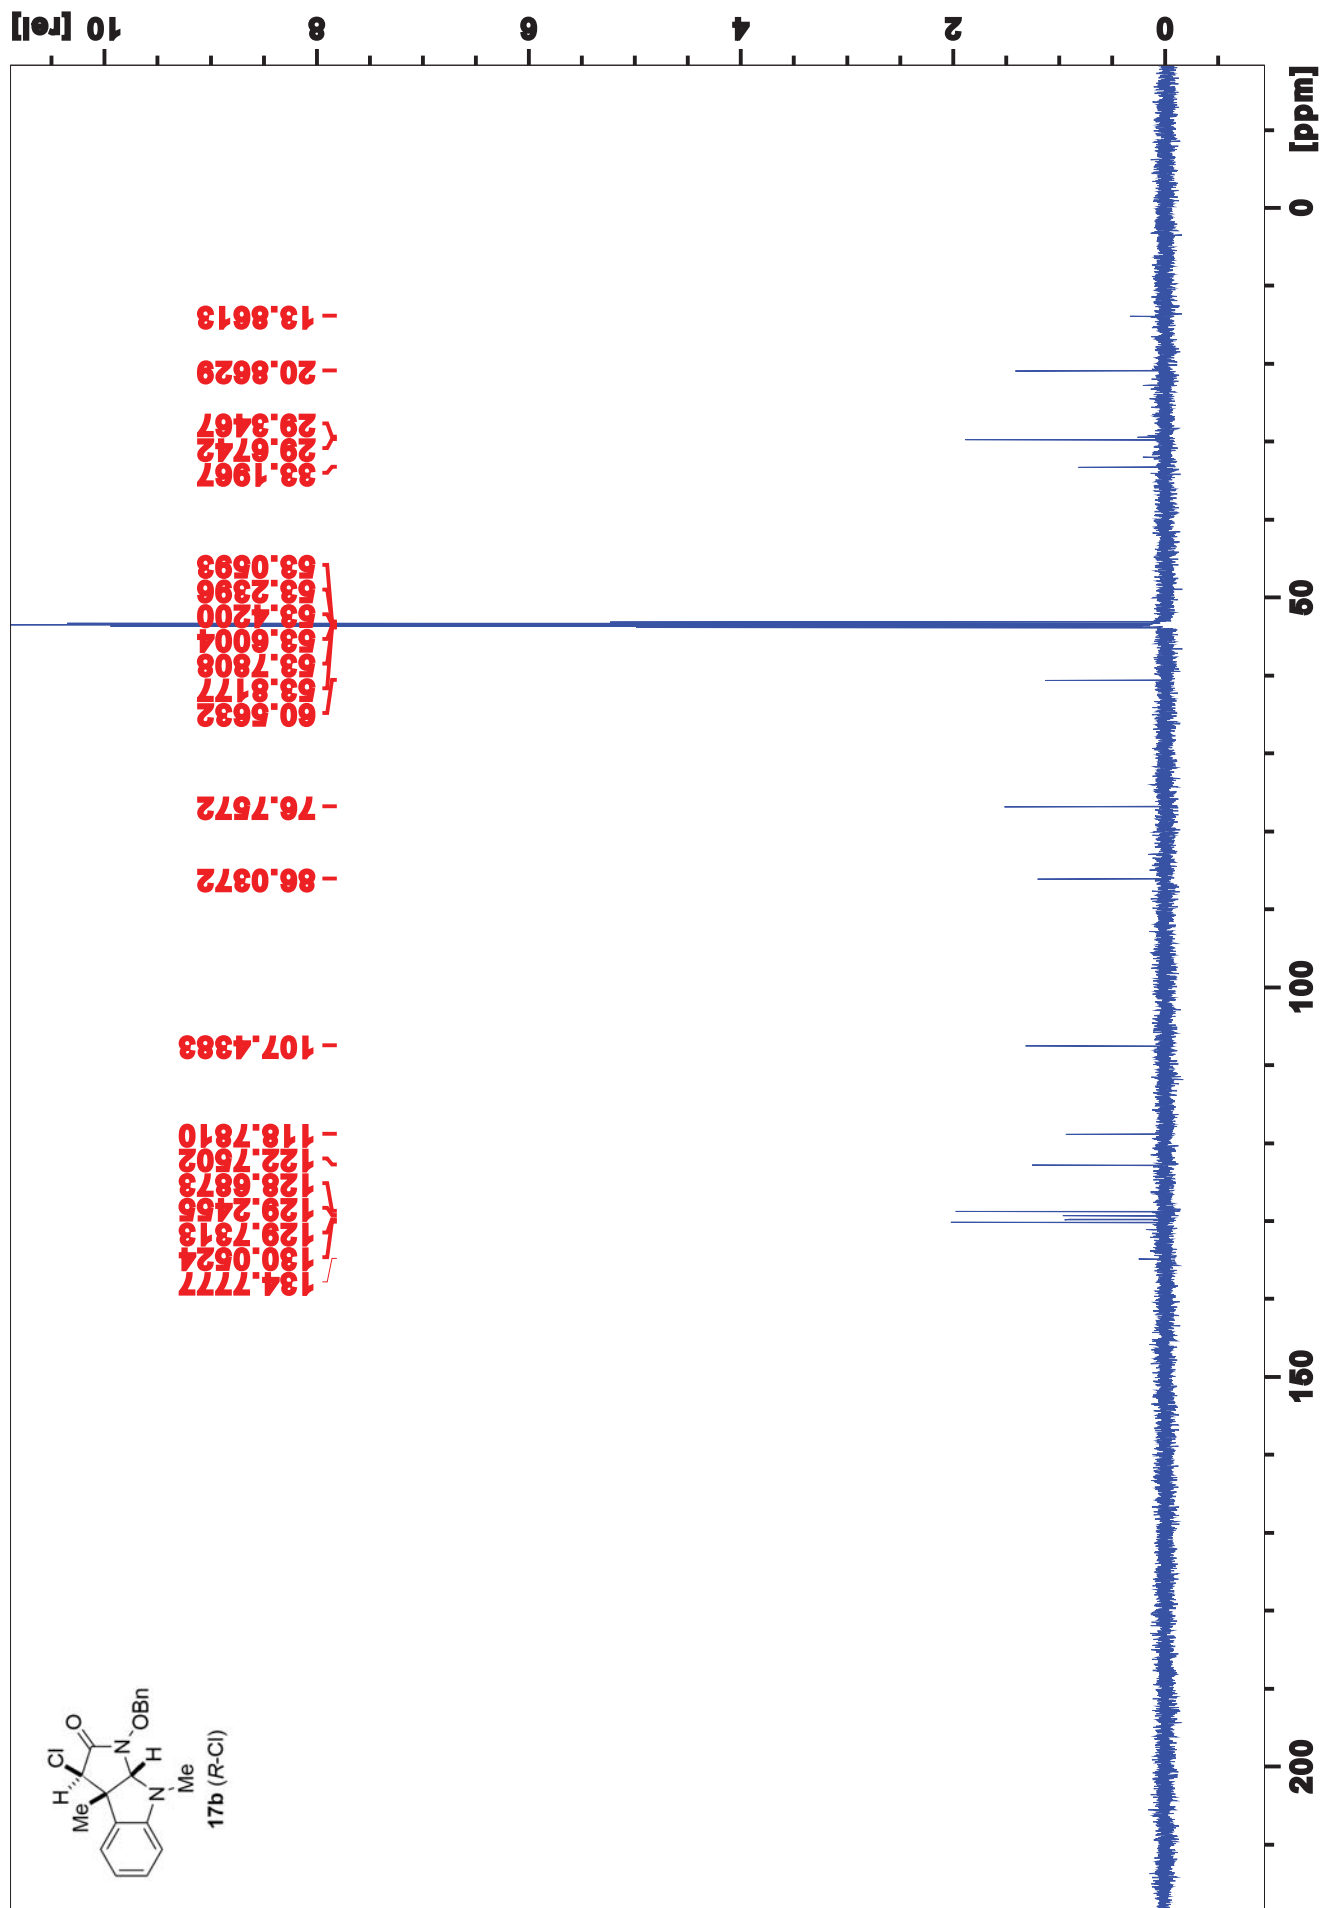

NOESY

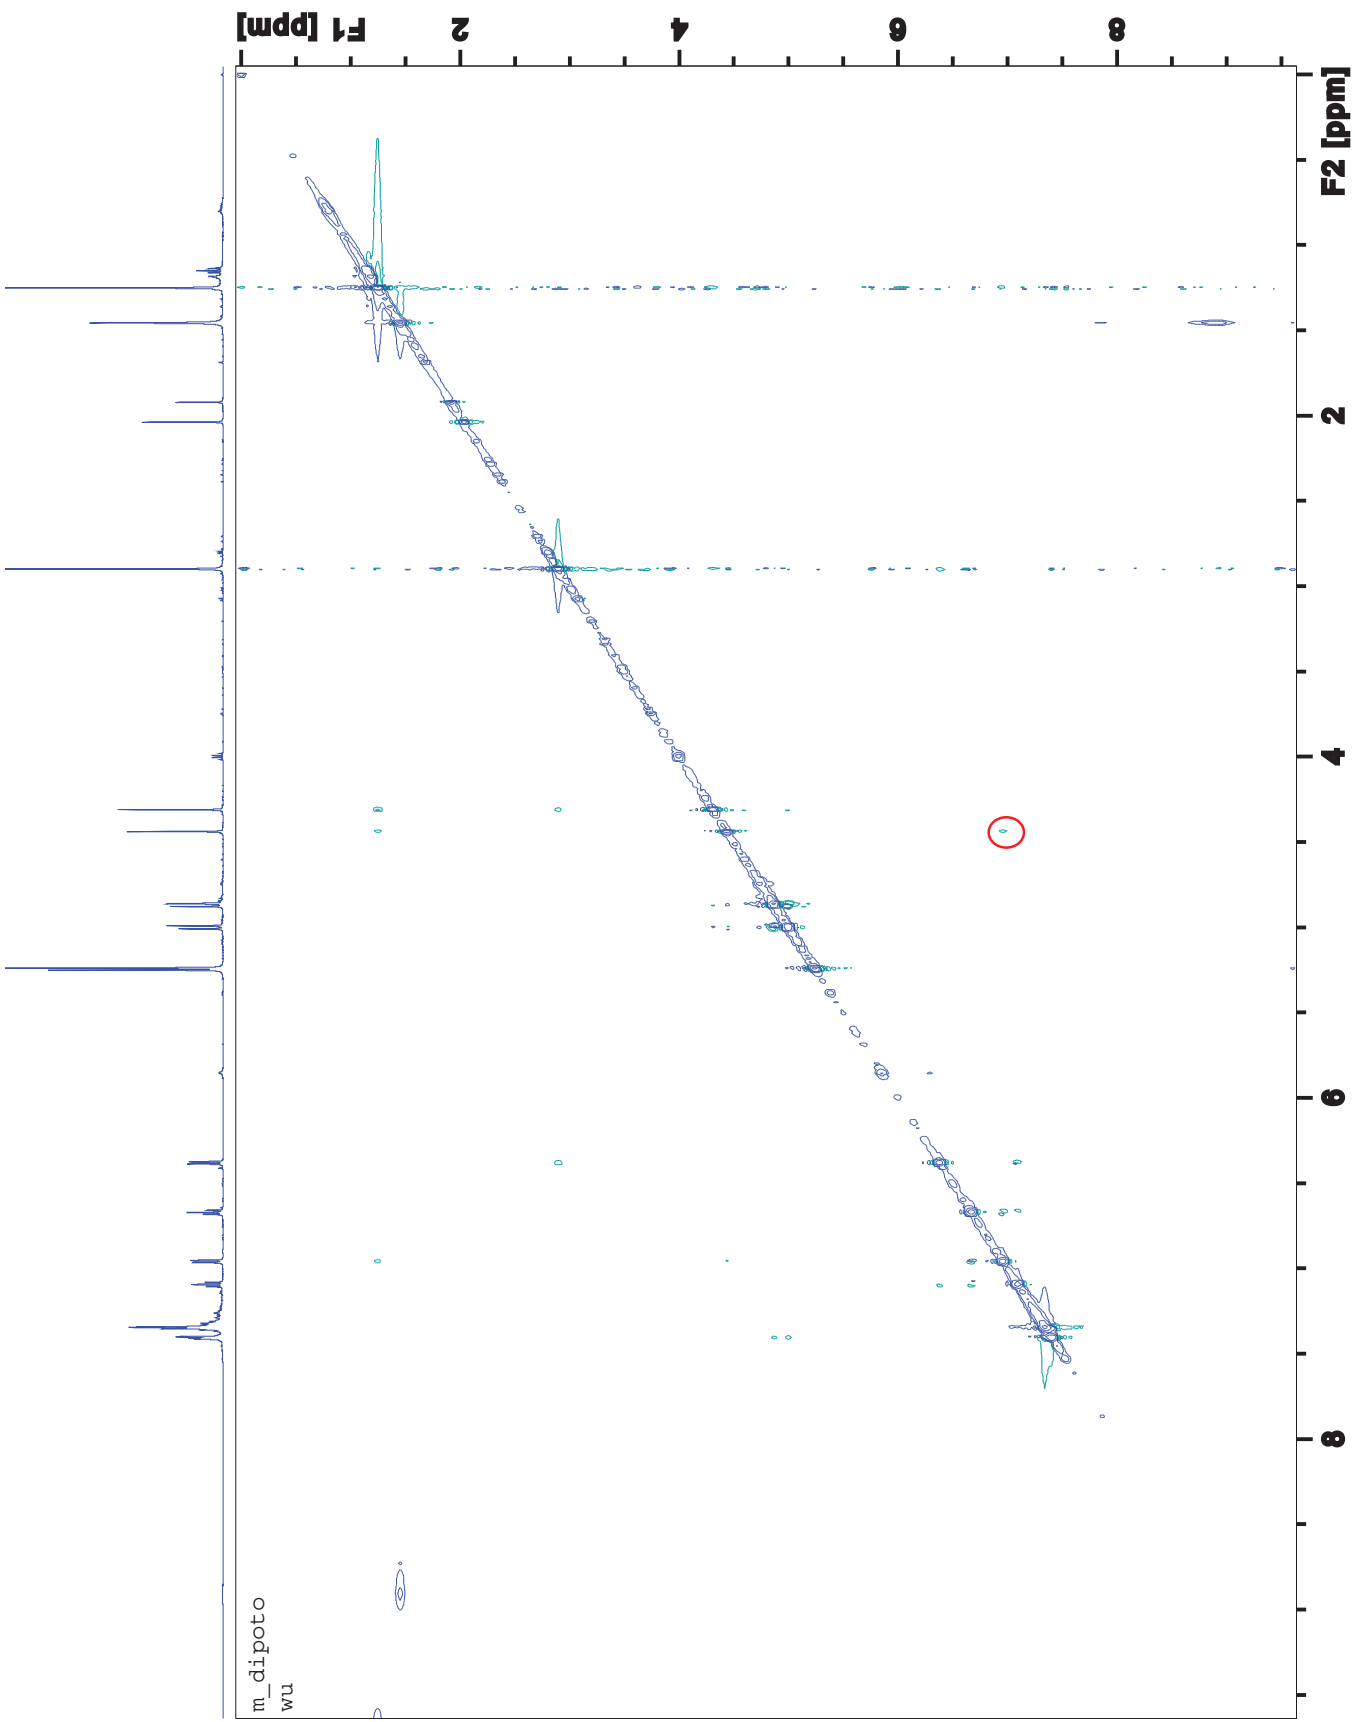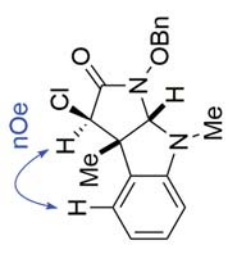

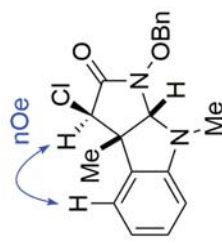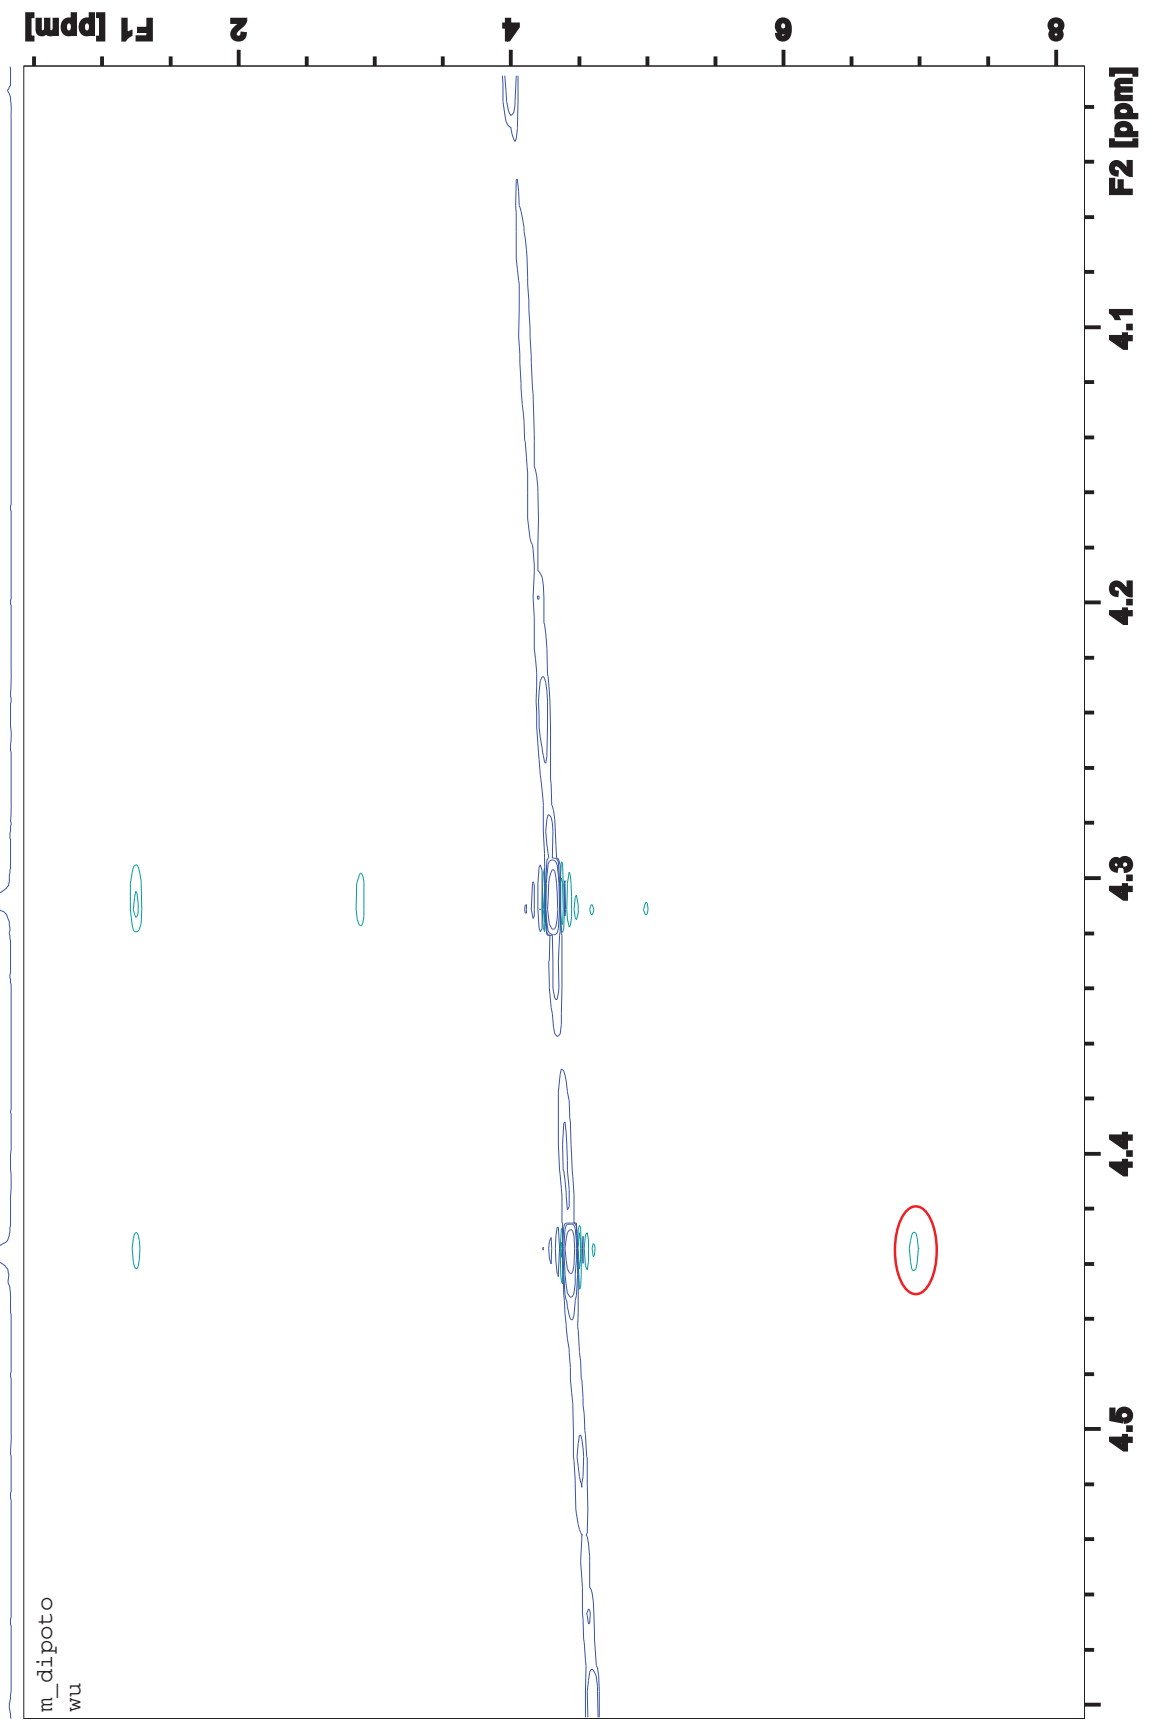

17b (R-Cl)

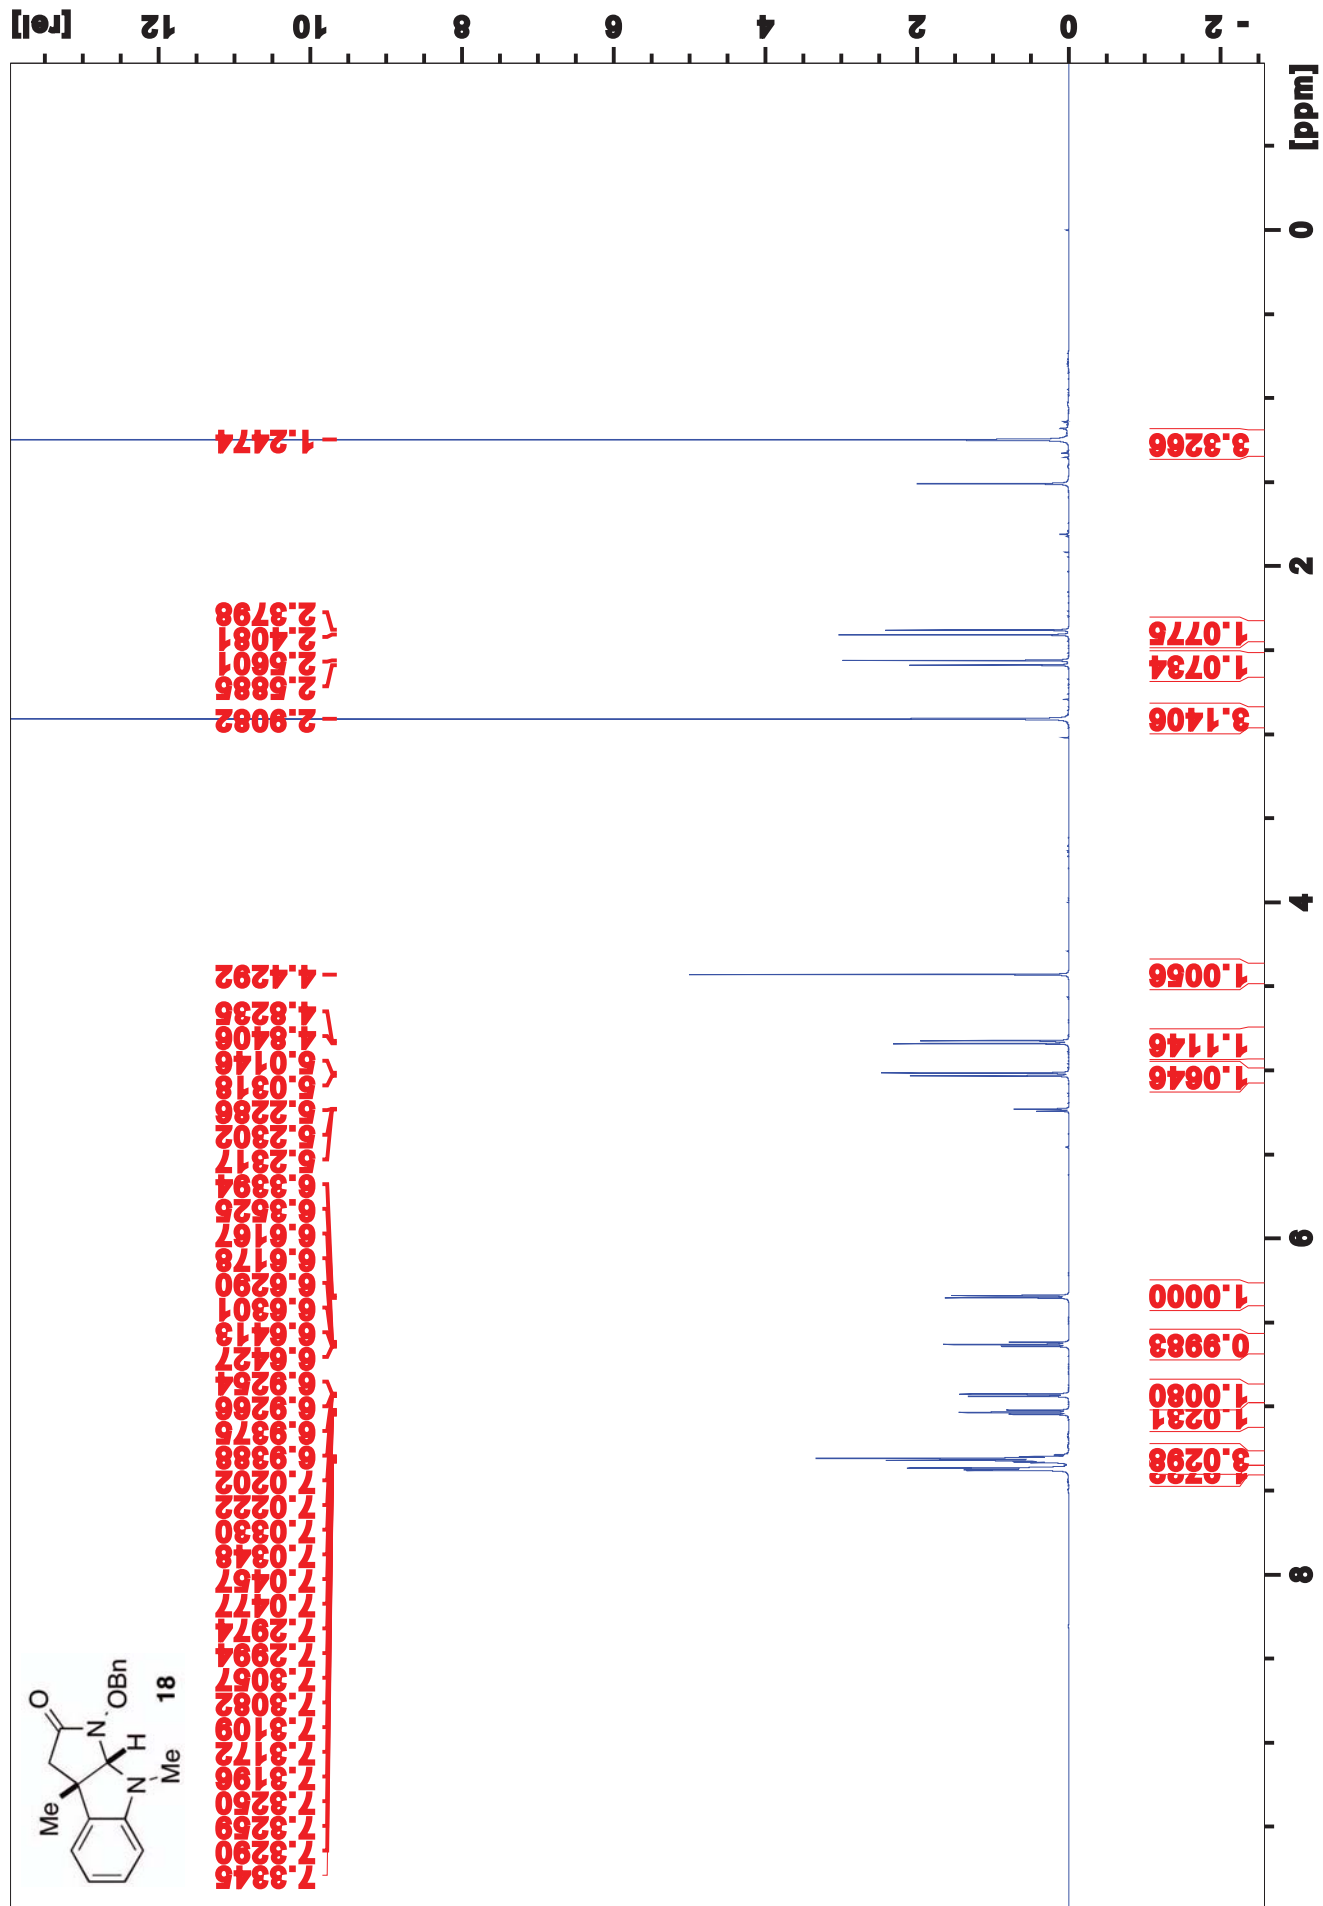

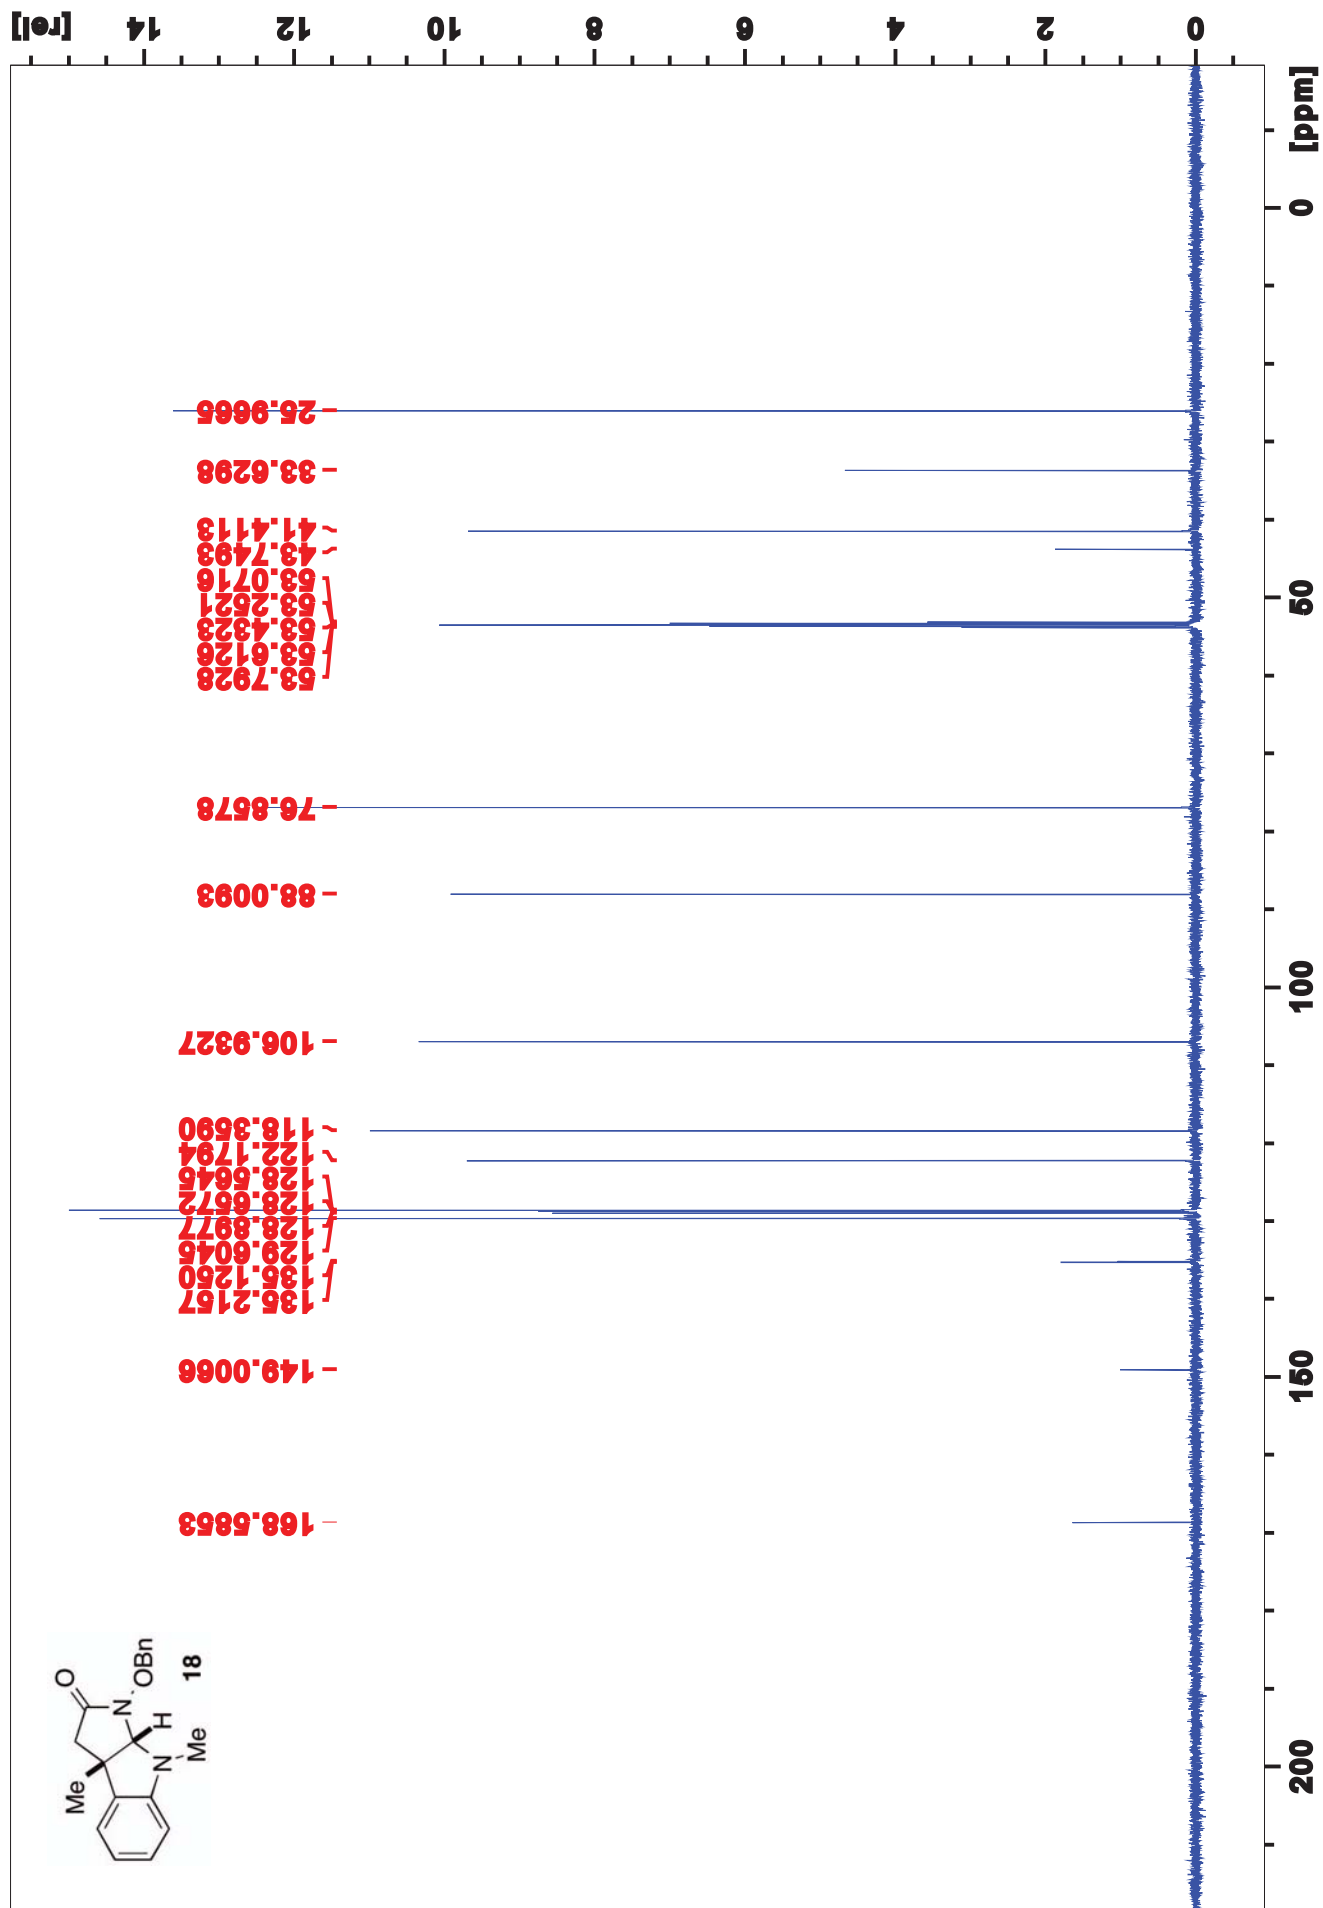

Supplement: ja5b10221_si_001.pdf [file ja5b10221_si_001.pdf]
